# Supplementary material for: Shatavari supplementation in postmenopausal women alters the skeletal muscle proteome and pathways involved in training adaptation
Source: Eur J Nutr. 2024 Jan 12;63(3):869–79. doi: 10.1007/s00394-023-03310-w (PMC10948523; doi:10.1007/s00394-023-03310-w)
Supplement: Supplementary file 1 — Supplementary file1 (XLSX 13 KB) [file 394_2023_3310_MOESM1_ESM.xlsx]

## Sheet: Down Pathway Collapse
CAMERA DOWN		Collapsed Themes
Viral Infection Pathways		Viral Infection
Metabolism of RNA		Translation/Amino Acid Metabolism
Metabolism of amino acids and derivatives		ROBO Pathways
Translation
Signaling by ROBO receptors
Regulation of expression of SLITs and ROBOs
Influenza Infection
Eukaryotic Translation Initiation
Cap-dependent Translation Initiation
Striated Muscle Contraction
Selenoamino acid metabolism
GTP hydrolysis and joining of the 60S ribosomal subunit
Influenza Viral RNA Transcription and Replication
L13a-mediated translational silencing of Ceruloplasmin expression
Cellular response to starvation
DNA Damage/Telomere Stress Induced Senescence
SRP-dependent cotranslational protein targeting to membrane
Formation of a pool of free 40S subunits
Eukaryotic Translation Elongation
Nonsense-Mediated Decay (NMD)
Nonsense Mediated Decay (NMD) enhanced by the Exon Junction Complex (EJC)
rRNA processing
Eukaryotic Translation Termination
rRNA processing in the nucleus and cytosol
Viral mRNA Translation
Peptide chain elongation
Nonsense Mediated Decay (NMD) independent of the Exon Junction Complex (EJC)
Selenocysteine synthesis
Major pathway of rRNA processing in the nucleolus and cytosol
Response of EIF2AK4 (GCN2) to amino acid deficiency

## Sheet: UP Pathway Collapse
PADOG and CAMERA UP	CAMERA ONLY UP	PADOG		Collapsed Themes
GABA receptor activation	Common Pathway of Fibrin Clot Formation	Activation of GABAB receptors		Transmission Across Chemical Synapses
Integration of energy metabolism	Formation of Fibrin Clot (Clotting Cascade)	Activation, translocation and oligomerization of BAX		Metabolism/Insulin Secretion
Integrin signaling		Adenylate cyclase inhibitory pathway		Neutrophil Degranulation
MAP2K and MAPK activation	Hemostasis	ADORA2B mediated anti-inflammatory cytokines production		Haemostasis/Platelets/Fibrin
Neutrophil degranulation	Neuronal System	ADP signalling through P2Y purinoceptor 12		Cellular Signal Transduction, General
Oncogenic MAPK signaling	Platelet activation, signaling and aggregation	Adrenaline,noradrenaline inhibits insulin secretion		Integrin/MAPK/BRAF/RAF Signalling
p130Cas linkage to MAPK signaling for integrins	Platelet degranulation	Cellular response to heat stress		Cell proliferation/senescence/DNA repair/cell death
Paradoxical activation of RAF signaling by kinase inactive BRAF	RAC1 GTPase cycle	Disease		Uncategorised
Platelet Aggregation (Plug Formation)	Response to elevated platelet cytosolic Ca2+	Formyl peptide receptors bind formyl peptides and many other ligands
Regulation of insulin secretion	Signal Transduction	G alpha (s) signalling events
RHOB GTPase cycle	Transmission across Chemical Synapses	G alpha (z) signalling events
Signaling by BRAF and RAF1 fusions		GABA B receptor activation
Signaling by high-kinase activity BRAF mutants		GPER1 signaling
Signaling by moderate kinase activity BRAF mutants		G-protein mediated events
Signaling by RAF1 mutants
Signaling by RAS mutants		Insulin effects increased synthesis of Xylulose-5-Phosphate
Signaling downstream of RAS mutants		Integrin cell surface interactions
GRB2:SOS provides linkage to MAPK signaling for Integrins		Interconversion of nucleotide di- and triphosphates
		Interleukin-4 and Interleukin-13 signaling
		Iron uptake and transport
		NFE2L2 regulates pentose phosphate pathway genes
		NTRK3 as a dependence receptor
		OAS antiviral response
		PI and PC transport between ER and Golgi membranes
		Post-translational modification: synthesis of GPI-anchored proteins
		Release of apoptotic factors from the mitochondria
		RHOC GTPase cycle
		Signal amplification
		Thrombin signalling through proteinase activated receptors (PARs)
		TP53 Regulates Transcription of Cell Death Genes
		TP53 Regulates Transcription of Genes Involved in Cytochrome C Release
		TP53 Regulates Transcription of Genes Involved in G2 Cell Cycle Arrest
