# Supplementary material for: Shatavari supplementation in postmenopausal women alters the skeletal muscle proteome and pathways involved in training adaptation
Source: Eur J Nutr. 2024 Jan 12;63(3):869–79. doi: 10.1007/s00394-023-03310-w (PMC10948523; doi:10.1007/s00394-023-03310-w)
Supplement: Supplementary file 4 — Supplementary file4 (XLSX 232 KB) [file 394_2023_3310_MOESM4_ESM.xlsx]

## Sheet: Pathways
Name	Direction.PROTEOMICS_INT_1	FDR.PROTEOMICS_INT_1	PValue.PROTEOMICS_INT_1	NGenes.PROTEOMICS_INT_1	av_foldchange.PROTEOMICS_INT_1
Response of EIF2AK4 (GCN2) to amino acid deficiency	Down	5.44409e-15	3.33788e-18	38	-0.315488
Selenocysteine synthesis	Down	7.82403e-15	1.43912e-17	37	-0.314382
Major pathway of rRNA processing in the nucleolus and cytosol	Down	7.82403e-15	1.43912e-17	37	-0.314382
Nonsense-Mediated Decay (NMD)	Down	1.82112e-14	5.86354e-17	43	-0.280943
Nonsense Mediated Decay (NMD) enhanced by the Exon Junction Complex (EJC)	Down	1.82112e-14	5.86354e-17	43	-0.280943
Nonsense Mediated Decay (NMD) independent of the Exon Junction Complex (EJC)	Down	1.82112e-14	6.77058e-17	38	-0.302336
Peptide chain elongation	Down	1.82112e-14	7.81597e-17	38	-0.301198
SRP-dependent cotranslational protein targeting to membrane	Down	1.89852e-14	1.05738e-16	44	-0.269804
rRNA processing	Down	1.89852e-14	1.13111e-16	41	-0.284355
rRNA processing in the nucleus and cytosol	Down	1.89852e-14	1.16402e-16	39	-0.294833
Formation of a pool of free 40S subunits	Down	3.47822e-14	2.40331e-16	43	-0.274166
Eukaryotic Translation Termination	Down	3.47822e-14	2.55909e-16	39	-0.291562
Viral mRNA Translation	Down	3.64638e-14	2.90637e-16	38	-0.296596
L13a-mediated translational silencing of Ceruloplasmin expression	Down	5.15838e-14	4.4278e-16	46	-0.259855
Eukaryotic Translation Elongation	Down	7.82909e-14	7.20026e-16	41	-0.276173
GTP hydrolysis and joining of the 60S ribosomal subunit	Down	1.47017e-13	1.44222e-15	47	-0.251683
Cellular response to starvation	Down	2.50474e-13	2.6107e-15	43	-0.261596
Influenza Viral RNA Transcription and Replication	Down	4.4414e-13	4.9016e-15	45	-0.259742
Eukaryotic Translation Initiation	Down	5.77505e-12	7.08161e-14	50	-0.224089
Cap-dependent Translation Initiation	Down	5.77505e-12	7.08161e-14	50	-0.224089
Selenoamino acid metabolism	Down	9.56887e-11	1.23204e-12	45	-0.226843
Influenza Infection	Down	4.23736e-10	5.71562e-12	51	-0.207414
Regulation of expression of SLITs and ROBOs	Down	2.48524e-09	3.50462e-11	65	-0.15931
Signaling by ROBO receptors	Down	5.90973e-07	8.69611e-09	75	-0.117508
Translation	Down	1.65542e-06	2.53743e-08	110	-0.0766922
p130Cas linkage to MAPK signaling for integrins	Up	4.051e-05	6.45775e-07	7	0.655654
Metabolism of amino acids and derivatives	Down	5.85912e-05	9.69933e-07	101	-0.0657024
Metabolism of RNA	Down	0.000154817	2.69765e-06	132	-0.0478045
Striated Muscle Contraction	Down	0.000154817	2.75272e-06	19	-0.225686
MAP2K and MAPK activation	Up	0.000343386	6.73718e-06	11	0.492156
Signaling by high-kinase activity BRAF mutants	Up	0.000343386	6.73718e-06	11	0.492156
Signaling by RAF1 mutants	Up	0.000343386	6.73718e-06	11	0.492156
Signaling by BRAF and RAF1 fusions	Up	0.000370077	7.48776e-06	14	0.437473
Integrin signaling	Up	0.000963402	2.06739e-05	8	0.560639
GRB2:SOS provides linkage to MAPK signaling for Integrins	Up	0.000963402	2.06739e-05	8	0.560639
Signaling by moderate kinase activity BRAF mutants	Up	0.00102505	2.45107e-05	12	0.455814
Signaling by RAS mutants	Up	0.00102505	2.45107e-05	12	0.455814
Paradoxical activation of RAF signaling by kinase inactive BRAF	Up	0.00102505	2.45107e-05	12	0.455814
Signaling downstream of RAS mutants	Up	0.00102505	2.45107e-05	12	0.455814
Platelet activation, signaling and aggregation	Up	0.00242079	5.93696e-05	49	0.292506
Platelet Aggregation (Plug Formation)	Up	0.00348804	8.76822e-05	10	0.485438
Oncogenic MAPK signaling	Up	0.00393245	0.000101265	17	0.371253
Formation of Fibrin Clot (Clotting Cascade)	Up	0.00961808	0.00025412	8	0.528655
Common Pathway of Fibrin Clot Formation	Up	0.00961808	0.00025947	5	0.64218
DNA Damage/Telomere Stress Induced Senescence	Down	0.0105737	0.000294919	8	-0.266308
Hemostasis	Up	0.0105737	0.000298215	88	0.240435
Platelet degranulation	Up	0.0110584	0.000318665	34	0.306138
Response to elevated platelet cytosolic Ca2+	Up	0.014817	0.000436062	36	0.295739
Viral Infection Pathways	Down	0.0157734	0.00047388	144	-0.0134553
GABA receptor activation	Up	0.0202129	0.000619648	4	0.539851
Transmission across Chemical Synapses	Up	0.0321022	0.00100381	19	0.299015
Signal Transduction	Up	0.0347412	0.00110763	257	0.187469
Integration of energy metabolism	Up	0.0379807	0.00124951	15	0.303973
Neuronal System	Up	0.0379807	0.00125749	25	0.266745
RAC1 GTPase cycle	Up	0.0407622	0.00137457	15	0.33556
RHOB GTPase cycle	Up	0.0419535	0.00144046	4	0.53083
Regulation of insulin secretion	Up	0.0457077	0.00159739	7	0.391961
Neutrophil degranulation	Up	0.0473737	0.00168466	98	0.204363
Cellular responses to stimuli	Down	0.0572387	0.00207056	169	0.00637706
Nonhomologous End-Joining (NHEJ)	Down	0.0573383	0.00210932	9	-0.244769
RAC3 GTPase cycle	Up	0.0594123	0.00225481	17	0.309967
DNA Double-Strand Break Repair	Down	0.0594123	0.00225847	13	-0.175871
Formation of Senescence-Associated Heterochromatin Foci (SAHF)	Down	0.0617092	0.00238362	4	-0.259045
2-LTR circle formation	Down	0.0648066	0.00254299	4	-0.272837
G alpha (z) signalling events	Up	0.066237	0.00263973	4	0.46888
Cellular responses to stress	Down	0.0668663	0.00270581	168	0.00789776
Cell-extracellular matrix interactions	Up	0.0686507	0.00282011	8	0.401643
Diseases of Immune System	Up	0.0737541	0.00327371	5	0.617342
Diseases associated with the TLR signaling cascade	Up	0.0737541	0.00327371	5	0.617342
MyD88 deficiency (TLR2/4)	Up	0.0737541	0.00327371	5	0.617342
IRAK4 deficiency (TLR2/4)	Up	0.0737541	0.00327371	5	0.617342
Regulation of TLR by endogenous ligand	Up	0.0737541	0.00327371	5	0.617342
RAC2 GTPase cycle	Up	0.0737541	0.00330107	18	0.29644
Adrenaline,noradrenaline inhibits insulin secretion	Up	0.0753935	0.00342067	4	0.456861
Release of apoptotic factors from the mitochondria	Up	0.0789171	0.0037257	1	0.73871
Activation, translocation and oligomerization of BAX	Up	0.0789171	0.0037257	1	0.73871
NTRK3 as a dependence receptor	Up	0.0789171	0.0037257	1	0.73871
RAB GEFs exchange GTP for GDP on RABs	Up	0.0932215	0.00445817	10	0.29165
GPCR downstream signalling	Up	0.0946725	0.00458561	20	0.274404
ADP signalling through P2Y purinoceptor 12	Up	0.0966219	0.00491699	3	0.516498
Signal amplification	Up	0.0966219	0.00491699	3	0.516498
GABA B receptor activation	Up	0.0966219	0.00491699	3	0.516498
Activation of GABAB receptors	Up	0.0966219	0.00491699	3	0.516498
Cellular Senescence	Down	0.101351	0.00537939	14	-0.125046
G alpha (i) signalling events	Up	0.101351	0.0054088	11	0.327903
Axon guidance	Down	0.101351	0.00547407	116	0.00692328
Nervous system development	Down	0.101351	0.00547407	116	0.00692328
Signaling by GPCR	Up	0.101351	0.00550783	21	0.26767
Neurotransmitter receptors and postsynaptic signal transmission	Up	0.101351	0.0055305	17	0.283865
Rab regulation of trafficking	Up	0.112906	0.00623026	18	0.267272
Signaling by Rho GTPases, Miro GTPases and RHOBTB3	Up	0.117708	0.00656738	111	0.203155
TP53 Regulates Transcription of Genes Involved in Cytochrome C Release	Up	0.120239	0.00678847	2	0.535633
Phospholipid metabolism	Up	0.120239	0.00685607	20	0.233398
G alpha (s) signalling events	Up	0.121012	0.00712271	4	0.43476
GPER1 signaling	Up	0.121012	0.00712271	4	0.43476
ADORA2B mediated anti-inflammatory cytokines production	Up	0.121012	0.00712271	4	0.43476
RAB geranylgeranylation	Up	0.129789	0.00771888	10	0.282315
Signaling by Rho GTPases	Up	0.131122	0.00787856	109	0.202843
Extra-nuclear estrogen signaling	Up	0.135096	0.00823822	6	0.371938
EPHB-mediated forward signaling	Up	0.135096	0.00828303	7	0.373379
Formation of the ternary complex, and subsequently, the 43S complex	Down	0.144466	0.0089461	21	-0.0286429
Cell junction organization	Up	0.146754	0.00917772	12	0.311851
GPCR ligand binding	Up	0.146834	0.00927277	8	0.369989
RHO GTPase Effectors	Up	0.162853	0.0103843	56	0.225634
MyD88:MAL(TIRAP) cascade initiated on plasma membrane	Up	0.166433	0.0110207	12	0.360808
Toll Like Receptor TLR1:TLR2 Cascade	Up	0.166433	0.0110207	12	0.360808
Toll Like Receptor TLR6:TLR2 Cascade	Up	0.166433	0.0110207	12	0.360808
Toll Like Receptor 2 (TLR2) Cascade	Up	0.166433	0.0110207	12	0.360808
Toll Like Receptor 4 (TLR4) Cascade	Up	0.171295	0.0114928	15	0.323043
Keratan sulfate/keratin metabolism	Up	0.171295	0.0121605	2	0.618781
Keratan sulfate biosynthesis	Up	0.171295	0.0121605	2	0.618781
Keratan sulfate degradation	Up	0.171295	0.0121605	2	0.618781
Defective CHST6 causes MCDC1	Up	0.171295	0.0121605	2	0.618781
Defective ST3GAL3 causes MCT12 and EIEE15	Up	0.171295	0.0121605	2	0.618781
Defective B4GALT1 causes B4GALT1-CDG (CDG-2d)	Up	0.171295	0.0121605	2	0.618781
Toll-like Receptor Cascades	Up	0.171295	0.0121828	17	0.302514
HIV Life Cycle	Down	0.173245	0.0125285	23	-0.0408428
Drug ADME	Up	0.173245	0.0125474	8	0.353931
Extracellular matrix organization	Up	0.173245	0.0127897	31	0.234459
Translation initiation complex formation	Down	0.173245	0.0130651	23	-0.0177957
Activation of the mRNA upon binding of the cap-binding complex and eIFs, and subsequent binding to 43S	Down	0.173245	0.0130651	23	-0.0177957
Ribosomal scanning and start codon recognition	Down	0.173245	0.0130651	23	-0.0177957
Immune System	Up	0.173245	0.0130651	266	0.164238
PI Metabolism	Up	0.176543	0.0134643	7	0.311303
Integration of provirus	Down	0.176543	0.0136385	5	-0.188764
Early Phase of HIV Life Cycle	Down	0.176543	0.0136385	5	-0.188764
Interleukin-4 and Interleukin-13 signaling	Up	0.185072	0.0144109	8	0.333121
RHOC GTPase cycle	Up	0.18641	0.0146294	5	0.409686
L1CAM interactions	Up	0.187375	0.0149442	22	0.238334
TP53 Regulates Transcription of Cell Death Genes	Up	0.187375	0.0150006	3	0.41321
Infectious disease	Down	0.187375	0.0150497	169	0.0217721
Metabolism of carbohydrates	Up	0.203146	0.016441	48	0.190814
Developmental Biology	Down	0.206039	0.0168015	138	0.0239473
NFE2L2 regulates pentose phosphate pathway genes	Up	0.206749	0.0169861	3	0.384813
Insulin effects increased synthesis of Xylulose-5-Phosphate	Up	0.209998	0.0173818	2	0.433656
RHOA GTPase cycle	Up	0.211932	0.0176719	10	0.289754
Mitochondrial protein import	Down	0.218603	0.0183621	25	-0.0053124
Mitochondrial translation	Down	0.219368	0.0186954	32	0.00574779
Mitochondrial translation elongation	Down	0.219368	0.0186954	32	0.00574779
Regulation of cytoskeletal remodeling and cell spreading by IPP complex components	Up	0.230025	0.0197447	4	0.355527
TP53 Regulates Transcription of Genes Involved in G2 Cell Cycle Arrest	Up	0.231883	0.0200463	2	0.4817
Signaling by Receptor Tyrosine Kinases	Up	0.234454	0.0204123	61	0.187246
Mitochondrial translation initiation	Down	0.235176	0.0207636	30	0.00531992
Mitochondrial translation termination	Down	0.235176	0.0207636	30	0.00531992
EPH-Ephrin signaling	Up	0.24595	0.0218655	15	0.257175
Intrinsic Pathway for Apoptosis	Up	0.2517	0.0225311	8	0.265737
G alpha (q) signalling events	Up	0.254115	0.023196	9	0.309565
Homology Directed Repair	Down	0.254115	0.0231985	8	-0.187265
Cytosolic sensors of pathogen-associated DNA	Down	0.254115	0.0232146	5	-0.128943
Oxidative Stress Induced Senescence	Down	0.254528	0.0234085	6	-0.213541
GP1b-IX-V activation signalling	Up	0.256419	0.02387	3	0.556652
RHO GTPases Activate WASPs and WAVEs	Up	0.256419	0.0239886	9	0.308275
Apoptotic factor-mediated response	Up	0.256419	0.0241743	2	0.453451
Signaling by VEGF	Up	0.256419	0.0243684	13	0.256147
VEGFA-VEGFR2 Pathway	Up	0.256419	0.0243684	13	0.256147
TP53 Regulates Transcription of Cell Cycle Genes	Up	0.261647	0.0250257	3	0.39191
Innate Immune System	Up	0.262368	0.0252555	171	0.169282
Cilium Assembly	Up	0.262441	0.0254235	21	0.233932
Signaling by NTRKs	Up	0.272407	0.0266371	22	0.204258
Recycling pathway of L1	Up	0.272407	0.0280086	12	0.258422
Intrinsic Pathway of Fibrin Clot Formation	Up	0.272407	0.0281607	6	0.360726
Opioid Signalling	Up	0.272407	0.0283868	7	0.298713
RHOF GTPase cycle	Up	0.272407	0.0283952	9	0.383803
Neurotransmitter release cycle	Up	0.272407	0.0287272	1	0.577631
Neurotransmitter clearance	Up	0.272407	0.0287272	1	0.577631
Norepinephrine Neurotransmitter Release Cycle	Up	0.272407	0.0287272	1	0.577631
Enzymatic degradation of dopamine by COMT	Up	0.272407	0.0287272	1	0.577631
Enzymatic degradation of Dopamine by monoamine oxidase	Up	0.272407	0.0287272	1	0.577631
Dopamine clearance from the synaptic cleft	Up	0.272407	0.0287272	1	0.577631
Metabolism of serotonin	Up	0.272407	0.0287272	1	0.577631
Serotonin clearance from the synaptic cleft	Up	0.272407	0.0287272	1	0.577631
Defective MAOA causes BRUNS	Up	0.272407	0.0287272	1	0.577631
Thrombin signalling through proteinase activated receptors (PARs)	Up	0.273555	0.029016	3	0.436996
Glycosaminoglycan metabolism	Up	0.283599	0.0304291	4	0.434544
Diseases associated with glycosaminoglycan metabolism	Up	0.283599	0.0304291	4	0.434544
Cooperation of PDCL (PhLP1) and TRiC/CCT in G-protein beta folding	Up	0.287751	0.031051	6	0.319702
TBC/RABGAPs	Up	0.300516	0.0326127	12	0.272363
Formyl peptide receptors bind formyl peptides and many other ligands	Up	0.304641	0.0332472	2	0.497192
Base Excision Repair	Down	0.30468	0.0334556	6	-0.186474
Inflammasomes	Down	0.30468	0.0339329	3	-0.179442
The NLRP3 inflammasome	Down	0.30468	0.0339329	3	-0.179442
G beta:gamma signalling through PI3Kgamma	Up	0.30468	0.0339986	3	0.413931
Regulation of Insulin-like Growth Factor (IGF) transport and uptake by Insulin-like Growth Factor Binding Proteins (IGFBPs)	Up	0.317023	0.0355703	21	0.238417
G-protein beta:gamma signalling	Up	0.320869	0.0361986	5	0.343524
OAS antiviral response	Up	0.321898	0.036512	2	0.665229
Dissolution of Fibrin Clot	Up	0.324891	0.0370507	5	0.378341
Biological oxidations	Up	0.325891	0.0373646	25	0.216106
Post-translational protein phosphorylation	Up	0.328056	0.0383515	19	0.240879
mRNA Editing: C to U Conversion	Down	0.328056	0.0390046	1	-0.351106
mRNA Editing	Down	0.328056	0.0390046	1	-0.351106
Formation of the Editosome	Down	0.328056	0.0390046	1	-0.351106
RHOQ GTPase cycle	Up	0.328056	0.0394809	8	0.296315
HDR through MMEJ (alt-NHEJ)	Down	0.328056	0.0399326	2	-0.213228
Mitotic Prometaphase	Up	0.328056	0.0415091	26	0.229629
Activation of G protein gated Potassium channels	Up	0.328056	0.0418367	2	0.478366
G protein gated Potassium channels	Up	0.328056	0.0418367	2	0.478366
G-protein activation	Up	0.328056	0.0418367	2	0.478366
Class B/2 (Secretin family receptors)	Up	0.328056	0.0418367	2	0.478366
Prostacyclin signalling through prostacyclin receptor	Up	0.328056	0.0418367	2	0.478366
G alpha (12/13) signalling events	Up	0.328056	0.0418367	2	0.478366
G beta:gamma signalling through PLC beta	Up	0.328056	0.0418367	2	0.478366
ADP signalling through P2Y purinoceptor 1	Up	0.328056	0.0418367	2	0.478366
Glucagon-type ligand receptors	Up	0.328056	0.0418367	2	0.478366
Thromboxane signalling through TP receptor	Up	0.328056	0.0418367	2	0.478366
Activation of kainate receptors upon glutamate binding	Up	0.328056	0.0418367	2	0.478366
Presynaptic function of Kainate receptors	Up	0.328056	0.0418367	2	0.478366
G beta:gamma signalling through BTK	Up	0.328056	0.0418367	2	0.478366
Inhibition of voltage gated Ca2+ channels via Gbeta/gamma subunits	Up	0.328056	0.0418367	2	0.478366
Condensation of Prophase Chromosomes	Down	0.328337	0.0420738	5	-0.225286
PECAM1 interactions	Up	0.329205	0.0423869	2	0.460911
EML4 and NUDC in mitotic spindle formation	Up	0.330847	0.0428012	22	0.242725
Adenylate cyclase inhibitory pathway	Up	0.332828	0.0432615	1	0.592762
Signal transduction by L1	Up	0.340474	0.0446031	4	0.349869
HCMV Late Events	Down	0.340474	0.0446728	16	-0.0621551
Branched-chain amino acid catabolism	Down	0.344051	0.0454745	9	-0.0461642
Nucleotide-binding domain, leucine rich repeat containing receptor (NLR) signaling pathways	Down	0.344051	0.0461323	4	-0.12775
Glycerophospholipid biosynthesis	Up	0.344051	0.0465488	14	0.203735
Formation of the beta-catenin:TCF transactivating complex	Down	0.344051	0.0485956	4	-0.275227
PRC2 methylates histones and DNA	Down	0.344051	0.0485956	4	-0.275227
SIRT1 negatively regulates rRNA expression	Down	0.344051	0.0485956	4	-0.275227
ERCC6 (CSB) and EHMT2 (G9a) positively regulate rRNA expression	Down	0.344051	0.0485956	4	-0.275227
NoRC negatively regulates rRNA expression	Down	0.344051	0.0485956	4	-0.275227
Negative epigenetic regulation of rRNA expression	Down	0.344051	0.0485956	4	-0.275227
DNA methylation	Down	0.344051	0.0485956	4	-0.275227
Activated PKN1 stimulates transcription of AR (androgen receptor) regulated genes KLK2 and KLK3	Down	0.344051	0.0485956	4	-0.275227
RNA Polymerase I Promoter Opening	Down	0.344051	0.0485956	4	-0.275227
RNA Polymerase I Promoter Escape	Down	0.344051	0.0485956	4	-0.275227
RNA Polymerase I Promoter Clearance	Down	0.344051	0.0485956	4	-0.275227
Defective pyroptosis	Down	0.344051	0.0485956	4	-0.275227
Anti-inflammatory response favouring Leishmania parasite infection	Up	0.344051	0.0487283	7	0.307542
Leishmania parasite growth and survival	Up	0.344051	0.0487283	7	0.307542
Downregulation of ERBB4 signaling	Down	0.344486	0.0492346	1	-0.296341
Glucagon signaling in metabolic regulation	Up	0.344486	0.0496347	3	0.382092
Vasopressin regulates renal water homeostasis via Aquaporins	Up	0.344486	0.0496347	3	0.382092
Aquaporin-mediated transport	Up	0.344486	0.0496347	3	0.382092
Cross-presentation of particulate exogenous antigens (phagosomes)	Up	0.344769	0.0498869	1	0.646264
RHO GTPases activate PAKs	Up	0.345356	0.0501835	11	0.324185
RHO GTPase cycle	Up	0.347361	0.0509034	62	0.185249
RHOG GTPase cycle	Up	0.347361	0.0509437	13	0.258434
G beta:gamma signalling through CDC42	Up	0.347361	0.0511138	4	0.35814
SARS-CoV-1 modulates host translation machinery	Down	0.35022	0.0519078	14	-0.00629146
Resolution of Sister Chromatid Cohesion	Up	0.35022	0.051964	21	0.243199
Vesicle-mediated transport	Up	0.352553	0.0525263	129	0.164116
Gene Silencing by RNA	Down	0.354937	0.0530991	14	-0.11775
Meiotic recombination	Down	0.359048	0.054391	6	-0.185703
Gap junction trafficking and regulation	Up	0.359048	0.0545939	8	0.266312
Gap junction trafficking	Up	0.359048	0.0545939	8	0.266312
DNA Repair	Down	0.359048	0.0546576	33	-0.00670512
Anchoring of the basal body to the plasma membrane	Up	0.359048	0.0548149	11	0.240554
Muscle contraction	Down	0.373563	0.0572599	47	0.0102647
CDC42 GTPase cycle	Up	0.374913	0.0580707	8	0.285683
RHO GTPases Activate Formins	Up	0.374913	0.0592537	25	0.229991
SARS-CoV-2 modulates host translation machinery	Down	0.374913	0.0592608	17	0.00316132
Recruitment of NuMA to mitotic centrosomes	Up	0.374913	0.0600537	12	0.243071
Chondroitin sulfate biosynthesis	Up	0.374913	0.0604191	1	0.58649
Dermatan sulfate biosynthesis	Up	0.374913	0.0604191	1	0.58649
CS/DS degradation	Up	0.374913	0.0604191	1	0.58649
Defective CHST3 causes SEDCJD	Up	0.374913	0.0604191	1	0.58649
Defective CHST14 causes EDS, musculocontractural type	Up	0.374913	0.0604191	1	0.58649
Defective CHSY1 causes TPBS	Up	0.374913	0.0604191	1	0.58649
Class A/1 (Rhodopsin-like receptors)	Up	0.374913	0.0608926	6	0.333863
Peptide ligand-binding receptors	Up	0.374913	0.0608926	6	0.333863
Integration of viral DNA into host genomic DNA	Down	0.374913	0.0620879	2	-0.213351
Autointegration results in viral DNA circles	Down	0.374913	0.0620879	2	-0.213351
Recognition and association of DNA glycosylase with site containing an affected pyrimidine	Down	0.374913	0.0631139	3	-0.316235
Cleavage of the damaged pyrimidine	Down	0.374913	0.0631139	3	-0.316235
Recognition and association of DNA glycosylase with site containing an affected purine	Down	0.374913	0.0631139	3	-0.316235
Cleavage of the damaged purine	Down	0.374913	0.0631139	3	-0.316235
Packaging Of Telomere Ends	Down	0.374913	0.0631139	3	-0.316235
Deposition of new CENPA-containing nucleosomes at the centromere	Down	0.374913	0.0631139	3	-0.316235
Depurination	Down	0.374913	0.0631139	3	-0.316235
Depyrimidination	Down	0.374913	0.0631139	3	-0.316235
Base-Excision Repair, AP Site Formation	Down	0.374913	0.0631139	3	-0.316235
Nucleosome assembly	Down	0.374913	0.0631139	3	-0.316235
Activation of anterior HOX genes in hindbrain development during early embryogenesis	Down	0.374913	0.0639126	5	-0.209886
Activation of HOX genes during differentiation	Down	0.374913	0.0639126	5	-0.209886
Inhibition of DNA recombination at telomere	Down	0.374913	0.0639126	5	-0.209886
SEMA3A-Plexin repulsion signaling by inhibiting Integrin adhesion	Up	0.374913	0.0640556	2	0.381687
Diseases of signal transduction by growth factor receptors and second messengers	Up	0.374913	0.0641329	68	0.173239
MAPK family signaling cascades	Up	0.382778	0.0658804	55	0.18202
Cell-Cell communication	Up	0.382778	0.0659476	19	0.233419
Acetylcholine regulates insulin secretion	Up	0.38943	0.0674891	1	0.541047
Glycogen breakdown (glycogenolysis)	Up	0.38943	0.0675712	7	0.244895
Glucagon-like Peptide-1 (GLP1) regulates insulin secretion	Up	0.38968	0.0679949	4	0.332993
RHOJ GTPase cycle	Up	0.38968	0.0680925	8	0.283794
Localization of the PINCH-ILK-PARVIN complex to focal adhesions	Up	0.390442	0.0685092	1	0.550205
Defective factor VIII causes hemophilia A	Up	0.390442	0.0691671	2	0.410714
Defective F8 cleavage by thrombin	Up	0.390442	0.0691671	2	0.410714
Transport of nucleosides and free purine and pyrimidine bases across the plasma membrane	Up	0.390442	0.0691832	2	0.363371
ROS and RNS production in phagocytes	Up	0.390872	0.069499	2	0.441032
Pre-NOTCH Processing in Golgi	Up	0.393766	0.0702778	3	0.311758
Recruitment and ATM-mediated phosphorylation of repair and signaling proteins at DNA double strand breaks	Down	0.393766	0.0707378	6	-0.206926
DNA Double Strand Break Response	Down	0.393766	0.0707378	6	-0.206926
G-protein mediated events	Up	0.396397	0.0714535	2	0.391153
Formation of tubulin folding intermediates by CCT/TriC	Up	0.397507	0.0718973	8	0.272431
HDR through Homologous Recombination (HRR) or Single Strand Annealing (SSA)	Down	0.410492	0.0747493	7	-0.173891
Processing of DNA double-strand break ends	Down	0.410492	0.0747493	7	-0.173891
vRNA Synthesis	Down	0.412493	0.0753667	1	-0.280877
Membrane Trafficking	Up	0.418805	0.0767766	119	0.158859
Pre-NOTCH Transcription and Translation	Down	0.421898	0.0776024	5	-0.205296
Response to metal ions	Down	0.427121	0.0795994	1	-0.2491
Metallothioneins bind metals	Down	0.427121	0.0795994	1	-0.2491
Syndecan interactions	Up	0.427121	0.0798133	2	0.426359
Rap1 signalling	Up	0.427121	0.0798368	4	0.310779
Signaling by NTRK1 (TRKA)	Up	0.427121	0.0798724	20	0.183543
Pyrimidine biosynthesis	Down	0.428313	0.0803579	1	-0.289493
Polo-like kinase mediated events	Up	0.44717	0.08417	1	1.09946
Translocation of SLC2A4 (GLUT4) to the plasma membrane	Up	0.4512	0.0852052	18	0.201819
Phase I - Functionalization of compounds	Up	0.453167	0.0858545	10	0.229934
Defects of contact activation system (CAS) and kallikrein/kinin system (KKS)	Up	0.457649	0.0872647	3	0.373998
Diseases of hemostasis	Up	0.457649	0.0872647	3	0.373998
tRNA processing in the nucleus	Down	0.461254	0.0882351	8	-0.0669897
Clathrin-mediated endocytosis	Up	0.464459	0.0891329	27	0.181856
POLB-Dependent Long Patch Base Excision Repair	Down	0.468971	0.0915959	2	-0.151205
RAF/MAP kinase cascade	Up	0.468971	0.0915966	48	0.182004
Golgi Associated Vesicle Biogenesis	Up	0.468971	0.0920505	8	0.206468
Mitotic Spindle Checkpoint	Up	0.468971	0.0926056	18	0.229778
RMTs methylate histone arginines	Down	0.468971	0.0930112	6	-0.0475001
RHOV GTPase cycle	Up	0.468971	0.0932054	9	0.233039
Aggrephagy	Up	0.468971	0.0938283	11	0.230567
Leishmania infection	Up	0.468971	0.0939096	23	0.194568
Parasitic Infection Pathways	Up	0.468971	0.0939096	23	0.194568
tRNA processing	Down	0.468971	0.094088	10	-0.0438679
Loss of Nlp from mitotic centrosomes	Up	0.468971	0.0943119	10	0.226794
Recruitment of mitotic centrosome proteins and complexes	Up	0.468971	0.0943119	10	0.226794
Loss of proteins required for interphase microtubule organization from the centrosome	Up	0.468971	0.0943119	10	0.226794
Centrosome maturation	Up	0.468971	0.0943119	10	0.226794
AURKA Activation by TPX2	Up	0.468971	0.0943119	10	0.226794
Ribavirin ADME	Up	0.470489	0.0949402	2	0.326749
Cytokine Signaling in Immune system	Up	0.470489	0.095194	87	0.156448
Vitamin B5 (pantothenate) metabolism	Up	0.476019	0.0966047	3	0.288248
MAPK1/MAPK3 signaling	Up	0.476433	0.0969809	49	0.180006
Defective F8 binding to von Willebrand factor	Up	0.477161	0.0974217	1	0.467172
Glycogen metabolism	Up	0.486651	0.0999277	10	0.211919
Erythrocytes take up oxygen and release carbon dioxide	Up	0.486651	0.100012	2	0.415657
Reproduction	Down	0.486651	0.100553	8	-0.113927
Meiosis	Down	0.486651	0.100553	8	-0.113927
Retrograde neurotrophin signalling	Up	0.488832	0.101964	4	0.251413
WNT5A-dependent internalization of FZD4	Up	0.488832	0.102749	3	0.273536
WNT5A-dependent internalization of FZD2, FZD5 and ROR2	Up	0.488832	0.102749	3	0.273536
VLDLR internalisation and degradation	Up	0.488832	0.102749	3	0.273536
LDL clearance	Up	0.488832	0.102749	3	0.273536
Post-translational protein modification	Up	0.488832	0.102802	191	0.141386
Metabolism of proteins	Down	0.491381	0.103639	325	0.0624808
Asparagine N-linked glycosylation	Up	0.49242	0.10416	62	0.170053
Platelet homeostasis	Up	0.493795	0.104891	10	0.221451
Regulation of TP53 Expression and Degradation	Up	0.493795	0.105056	4	0.272727
Binding and Uptake of Ligands by Scavenger Receptors	Up	0.494948	0.105605	11	0.23789
Integrin cell surface interactions	Up	0.501631	0.107659	12	0.234558
Endosomal Sorting Complex Required For Transport (ESCRT)	Down	0.501631	0.108486	11	-0.00316108
HDACs deacetylate histones	Down	0.501631	0.108653	1	-0.699546
Recycling of bile acids and salts	Up	0.501631	0.109184	1	0.454262
Heme biosynthesis	Up	0.501631	0.109184	1	0.454262
Prednisone ADME	Up	0.501631	0.109184	1	0.454262
Ciprofloxacin ADME	Up	0.501631	0.109184	1	0.454262
STING mediated induction of host immune responses	Down	0.509041	0.111594	3	-0.140963
IRF3-mediated induction of type I IFN	Down	0.509041	0.111594	3	-0.140963
PERK regulates gene expression	Down	0.509041	0.111852	2	-0.154306
Vpr-mediated nuclear import of PICs	Down	0.509041	0.112045	7	-0.0878643
Aspirin ADME	Up	0.50999	0.112567	2	0.407491
Regulation of FOXO transcriptional activity by acetylation	Down	0.51966	0.11502	2	-0.142727
Surfactant metabolism	Down	0.520066	0.115499	1	-0.184694
Amplification of signal from the kinetochores	Up	0.520066	0.116252	17	0.228778
Amplification of signal from unattached kinetochores via a MAD2 inhibitory signal	Up	0.520066	0.116252	17	0.228778
Synthesis of PIPs at the plasma membrane	Up	0.520066	0.116447	4	0.258483
Regulation of HMOX1 expression and activity	Down	0.520066	0.117086	1	-0.252847
Purine catabolism	Down	0.520066	0.117342	3	-0.0925336
Nucleotide catabolism	Down	0.520066	0.117342	3	-0.0925336
Adaptive Immune System	Up	0.520437	0.117744	111	0.163116
MTOR signalling	Up	0.527489	0.119663	9	0.210476
Chaperone Mediated Autophagy	Up	0.528524	0.120489	5	0.276102
Ion transport by P-type ATPases	Up	0.528524	0.120546	6	0.228304
Transcriptional regulation of granulopoiesis	Down	0.551807	0.126576	5	-0.182702
ER to Golgi Anterograde Transport	Up	0.551807	0.126872	41	0.180713
Transport to the Golgi and subsequent modification	Up	0.551807	0.126872	41	0.180713
PI and PC transport between ER and Golgi membranes	Up	0.562477	0.12996	1	0.363448
Diseases of metabolism	Up	0.562477	0.130015	26	0.188938
Coenzyme A biosynthesis	Up	0.563546	0.130607	2	0.297357
Elastic fibre formation	Up	0.564182	0.131446	3	0.272845
Molecules associated with elastic fibres	Up	0.564182	0.131446	3	0.272845
Signaling by Interleukins	Up	0.581164	0.135759	62	0.156967
Small interfering RNA (siRNA) biogenesis	Down	0.581394	0.13617	3	-0.224442
Budding and maturation of HIV virion	Down	0.583887	0.137111	9	-0.00764736
Late Phase of HIV Life Cycle	Down	0.584578	0.137632	19	0.00799813
Transport of vitamins, nucleosides, and related molecules	Up	0.585722	0.138261	3	0.277173
Intra-Golgi traffic	Down	0.592364	0.140218	4	-0.034647
Bile acid and bile salt metabolism	Up	0.592364	0.140555	4	0.255562
EPH-ephrin mediated repulsion of cells	Up	0.596982	0.142025	4	0.237789
Protein localization	Down	0.596982	0.142535	47	0.0494803
Signaling by FLT3 fusion proteins	Down	0.596982	0.143415	3	-0.0904923
Infection with Mycobacterium tuberculosis	Up	0.596982	0.143835	3	0.276934
Response of Mtb to phagocytosis	Up	0.596982	0.143835	3	0.276934
Post-translational modification: synthesis of GPI-anchored proteins	Up	0.596982	0.144382	1	0.324525
Post-chaperonin tubulin folding pathway	Up	0.596982	0.145526	6	0.262896
Deregulated CDK5 triggers multiple neurodegenerative pathways in Alzheimer's disease models	Up	0.596982	0.145575	3	0.24422
Neurodegenerative Diseases	Up	0.596982	0.145575	3	0.24422
Defective Intrinsic Pathway for Apoptosis	Up	0.596982	0.145575	3	0.24422
ZBP1(DAI) mediated induction of type I IFNs	Down	0.596982	0.146661	1	-0.146271
RIP-mediated NFkB activation via ZBP1	Down	0.596982	0.146661	1	-0.146271
DEx/H-box helicases activate type I IFN and inflammatory cytokines production	Down	0.596982	0.146661	1	-0.146271
SARS-CoV-2 modulates autophagy	Up	0.596982	0.146775	1	0.459086
Early SARS-CoV-2 Infection Events	Down	0.600361	0.147974	7	-0.0103066
RNA Polymerase I Transcription	Down	0.606179	0.149779	5	-0.182948
Smooth Muscle Contraction	Up	0.609058	0.150864	17	0.221515
Translation of Replicase and Assembly of the Replication Transcription Complex	Down	0.610399	0.152374	5	-0.0322053
Translation of Replicase and Assembly of the Replication Transcription Complex	Down	0.610399	0.152374	5	-0.0322053
Iron uptake and transport	Up	0.610399	0.152389	8	0.228056
Glyoxylate metabolism and glycine degradation	Down	0.610399	0.154222	8	-0.00960575
Reelin signalling pathway	Down	0.610399	0.154408	1	-0.16549
COPI-dependent Golgi-to-ER retrograde traffic	Up	0.610399	0.15503	22	0.199436
Meiotic synapsis	Down	0.610399	0.157201	5	-0.14918
Cobalamin (Cbl, vitamin B12) transport and metabolism	Up	0.610399	0.157523	1	0.434039
Defects in cobalamin (B12) metabolism	Up	0.610399	0.157523	1	0.434039
Defective MMAA causes MMA, cblA type	Up	0.610399	0.157523	1	0.434039
Defective MUT causes MMAM	Up	0.610399	0.157523	1	0.434039
Cobalamin (Cbl) metabolism	Up	0.610399	0.157523	1	0.434039
Diseases of mitochondrial beta oxidation	Up	0.610399	0.157523	1	0.434039
Diseases of propionyl-CoA catabolism	Up	0.610399	0.157523	1	0.434039
Gap junction degradation	Up	0.610399	0.157565	4	0.228133
Formation of annular gap junctions	Up	0.610399	0.157565	4	0.228133
Parasite infection	Up	0.610399	0.158307	14	0.195716
Leishmania phagocytosis	Up	0.610399	0.158307	14	0.195716
FCGR3A-mediated phagocytosis	Up	0.610399	0.158307	14	0.195716
COPI-mediated anterograde transport	Up	0.613519	0.159492	30	0.188971
Scavenging of heme from plasma	Up	0.615334	0.160342	8	0.250868
Collagen degradation	Down	0.616864	0.161118	3	-0.102313
RHOD GTPase cycle	Up	0.621655	0.162761	13	0.234316
Transcriptional regulation by small RNAs	Down	0.621655	0.163357	12	-0.0750617
Plasma lipoprotein assembly, remodeling, and clearance	Up	0.621655	0.163518	11	0.204211
Fcgamma receptor (FCGR) dependent phagocytosis	Up	0.621655	0.164276	15	0.190378
Regulation of actin dynamics for phagocytic cup formation	Up	0.621655	0.164276	15	0.190378
Collagen chain trimerization	Down	0.633837	0.167883	2	-0.152815
Activation of BAD and translocation to mitochondria	Up	0.638891	0.170397	4	0.231334
Regulation of localization of FOXO transcription factors	Up	0.638891	0.170397	4	0.231334
SARS-CoV-2 targets host intracellular signalling and regulatory pathways	Up	0.638891	0.170397	4	0.231334
Defective GFPT1 causes CMSTA1	Down	0.642215	0.171851	1	-0.217089
Mitotic Prophase	Down	0.642215	0.172071	19	-0.0307174
ECM proteoglycans	Up	0.644088	0.173178	9	0.241798
Interleukin-12 family signaling	Up	0.644088	0.173363	18	0.18598
Chromatin modifying enzymes	Down	0.646657	0.176365	13	-0.0194493
Chromatin organization	Down	0.646657	0.176365	13	-0.0194493
Microtubule-dependent trafficking of connexons from Golgi to the plasma membrane	Up	0.646657	0.176433	4	0.304492
Gap junction assembly	Up	0.646657	0.176433	4	0.304492
Transport of connexons to the plasma membrane	Up	0.646657	0.176433	4	0.304492
Carboxyterminal post-translational modifications of tubulin	Up	0.646657	0.176433	4	0.304492
Phenylalanine and tyrosine metabolism	Down	0.646661	0.177227	1	-0.156476
Phenylalanine metabolism	Down	0.646661	0.177227	1	-0.156476
Phase II - Conjugation of compounds	Up	0.647883	0.177959	14	0.209288
Crosslinking of collagen fibrils	Up	0.649639	0.17884	2	0.357672
HIV Infection	Down	0.65221	0.179947	51	0.0432125
Entry of Influenza Virion into Host Cell via Endocytosis	Up	0.654981	0.181114	1	0.308801
Prolonged ERK activation events	Up	0.661962	0.183856	5	0.224867
Frs2-mediated activation	Up	0.661962	0.183856	5	0.224867
Synthesis of PIPs at the Golgi membrane	Up	0.668703	0.186313	1	0.515407
Intraflagellar transport	Up	0.668703	0.186548	6	0.25078
Stimuli-sensing channels	Down	0.671389	0.187709	8	-0.014946
Antigen processing-Cross presentation	Up	0.672851	0.18853	29	0.213518
Amine Oxidase reactions	Up	0.674963	0.191308	2	0.305345
Biogenic amines are oxidatively deaminated to aldehydes by MAOA and MAOB	Up	0.674963	0.191308	2	0.305345
rRNA processing in the mitochondrion	Down	0.674963	0.19349	2	-0.0800242
Selective autophagy	Up	0.674963	0.193993	20	0.173007
Neurexins and neuroligins	Up	0.674963	0.194052	5	0.203933
Protein-protein interactions at synapses	Up	0.674963	0.194052	5	0.203933
Diseases associated with N-glycosylation of proteins	Down	0.674963	0.194233	1	-0.148206
Defective MOGS causes CDG-2b	Down	0.674963	0.194233	1	-0.148206
Maturation of spike protein	Down	0.674963	0.194233	1	-0.148206
Reduction of cytosolic Ca++ levels	Up	0.674963	0.194253	3	0.249847
Platelet calcium homeostasis	Up	0.674963	0.194253	3	0.249847
Metabolism of water-soluble vitamins and cofactors	Up	0.674963	0.194419	15	0.170066
Purine ribonucleoside monophosphate biosynthesis	Up	0.674963	0.194761	2	0.276657
Metal sequestration by antimicrobial proteins	Up	0.674963	0.194916	2	0.495516
Vpr-mediated induction of apoptosis by mitochondrial outer membrane permeabilization	Up	0.681196	0.197133	1	0.390148
Activation of BH3-only proteins	Up	0.68218	0.197836	5	0.206319
FLT3 signaling in disease	Down	0.684796	0.199443	4	-0.0468404
Inwardly rectifying K+ channels	Up	0.684796	0.199855	3	0.308131
Potassium Channels	Up	0.684796	0.199855	3	0.308131
SUMOylation of DNA damage response and repair proteins	Down	0.686226	0.200693	8	-0.0447916
Pyrimidine catabolism	Down	0.688901	0.204012	2	-0.0772474
Paracetamol ADME	Up	0.688901	0.204484	3	0.346232
Prevention of phagosomal-lysosomal fusion	Up	0.688901	0.205619	1	0.395966
Suppression of autophagy	Up	0.688901	0.205619	1	0.395966
RUNX1 regulates transcription of genes involved in differentiation of HSCs	Down	0.688901	0.205629	24	0.0149822
SUMO E3 ligases SUMOylate target proteins	Down	0.688901	0.205787	9	-0.0349378
Transcription of the HIV genome	Down	0.688901	0.206256	3	-0.042112
ER Quality Control Compartment (ERQC)	Up	0.688901	0.206306	1	0.357806
Calnexin/calreticulin cycle	Up	0.688901	0.206306	1	0.357806
Plasma lipoprotein clearance	Up	0.688901	0.207032	6	0.211938
Positive epigenetic regulation of rRNA expression	Down	0.688901	0.207443	6	-0.128245
B-WICH complex positively regulates rRNA expression	Down	0.688901	0.207443	6	-0.128245
Gene and protein expression by JAK-STAT signaling after Interleukin-12 stimulation	Up	0.688901	0.207662	16	0.1828
Interleukin-12 signaling	Up	0.688901	0.207662	16	0.1828
Sema4D mediated inhibition of cell attachment and migration	Up	0.688901	0.207811	1	0.378799
Golgi-to-ER retrograde transport	Up	0.700362	0.212083	37	0.171983
Regulation of TP53 Degradation	Up	0.700362	0.212127	3	0.240479
Hypusine synthesis from eIF5A-lysine	Down	0.705381	0.214079	2	-0.0884778
RUNX1 regulates genes involved in megakaryocyte differentiation and platelet function	Down	0.708574	0.21565	5	-0.154977
Folding of actin by CCT/TriC	Up	0.708574	0.215917	4	0.240371
APOBEC3G mediated resistance to HIV-1 infection	Down	0.715376	0.2186	3	-0.0930574
Antimicrobial peptides	Up	0.715376	0.219658	6	0.296249
Antigen activates B Cell Receptor (BCR) leading to generation of second messengers	Down	0.715376	0.219699	5	-0.00543879
Attenuation phase	Up	0.715376	0.219745	3	0.236453
E2F mediated regulation of DNA replication	Up	0.718517	0.22115	3	0.314348
Nuclear events stimulated by ALK signaling in cancer	Up	0.719624	0.221932	4	0.203603
Protein repair	Down	0.72655	0.224513	4	-0.0345723
E2F-enabled inhibition of pre-replication complex formation	Up	0.727228	0.225615	2	0.380614
CDC6 association with the ORC:origin complex	Up	0.727228	0.225615	2	0.380614
RHO GTPases Activate NADPH Oxidases	Up	0.728765	0.226824	4	0.371598
Interleukin-10 signaling	Up	0.728765	0.226985	2	0.238888
Apoptosis induced DNA fragmentation	Down	0.731175	0.228184	5	-0.0309104
Interleukin-1 processing	Up	0.7373	0.230999	1	0.290376
Interleukin-18 signaling	Up	0.7373	0.230999	1	0.290376
Molybdenum cofactor biosynthesis	Up	0.738243	0.231748	1	0.296541
MHC class II antigen presentation	Up	0.74117	0.234153	27	0.165654
Resolution of AP sites via the multiple-nucleotide patch replacement pathway	Down	0.74117	0.234731	3	-0.0567132
Resolution of Abasic Sites (AP sites)	Down	0.74117	0.234731	3	-0.0567132
AKT phosphorylates targets in the cytosol	Up	0.74117	0.234939	2	0.265927
Constitutive Signaling by AKT1 E17K in Cancer	Up	0.74117	0.234939	2	0.265927
Suppression of phagosomal maturation	Up	0.745373	0.236751	2	0.292004
Formation of ATP by chemiosmotic coupling	Down	0.745373	0.237185	9	0.0272838
Metabolism of vitamins and cofactors	Up	0.745634	0.238213	27	0.158299
Carnitine metabolism	Down	0.745634	0.238734	5	-0.00616592
Transport of Mature mRNA derived from an Intron-Containing Transcript	Down	0.745634	0.239097	12	-0.0132115
Transport of Mature Transcript to Cytoplasm	Down	0.745634	0.239097	12	-0.0132115
Peptide hormone metabolism	Up	0.745782	0.239601	3	0.295636
Activation of ATR in response to replication stress	Up	0.753575	0.243029	3	0.297833
Activation of the pre-replicative complex	Up	0.753575	0.243029	3	0.297833
Signalling to ERKs	Up	0.75424	0.244004	10	0.179418
SUMOylation	Down	0.75424	0.244172	10	-0.0206065
Interconversion of nucleotide di- and triphosphates	Down	0.75424	0.244631	5	0.00260533
TALDO1 deficiency: failed conversion of SH7P, GA3P to Fru(6)P, E4P	Up	0.765622	0.250761	1	0.311584
TALDO1 deficiency: failed conversion of Fru(6)P, E4P to SH7P, GA3P	Up	0.765622	0.250761	1	0.311584
Netrin-1 signaling	Up	0.765622	0.252919	7	0.193296
STAT3 nuclear events downstream of ALK signaling	Up	0.765622	0.25326	2	0.278434
Resolution of D-Loop Structures	Down	0.765622	0.254425	1	-0.145579
Sensing of DNA Double Strand Breaks	Down	0.765622	0.254425	1	-0.145579
Resolution of D-loop Structures through Synthesis-Dependent Strand Annealing (SDSA)	Down	0.765622	0.254425	1	-0.145579
Resolution of D-loop Structures through Holliday Junction Intermediates	Down	0.765622	0.254425	1	-0.145579
Defective homologous recombination repair (HRR) due to BRCA1 loss of function	Down	0.765622	0.254425	1	-0.145579
Defective homologous recombination repair (HRR) due to PALB2 loss of function	Down	0.765622	0.254425	1	-0.145579
Defective HDR through Homologous Recombination Repair (HRR) due to PALB2 loss of BRCA1 binding function	Down	0.765622	0.254425	1	-0.145579
Defective HDR through Homologous Recombination Repair (HRR) due to PALB2 loss of BRCA2/RAD51/RAD51C binding function	Down	0.765622	0.254425	1	-0.145579
Impaired BRCA2 binding to PALB2	Down	0.765622	0.254425	1	-0.145579
NCAM signaling for neurite out-growth	Down	0.766626	0.255326	4	-0.0584957
Axonal growth inhibition (RHOA activation)	Up	0.766626	0.256169	1	0.33547
p75NTR regulates axonogenesis	Up	0.766626	0.256169	1	0.33547
Potential therapeutics for SARS	Up	0.767575	0.256971	14	0.166341
Pentose phosphate pathway	Up	0.767575	0.257427	7	0.194686
Semaphorin interactions	Up	0.769065	0.258398	9	0.197142
Chk1/Chk2(Cds1) mediated inactivation of Cyclin B:Cdk1 complex	Up	0.770925	0.260837	3	0.213425
SARS-CoV-1 targets host intracellular signalling and regulatory pathways	Up	0.770925	0.260837	3	0.213425
SARS-CoV-1 Infection	Down	0.770925	0.260905	32	0.0535549
tRNA processing in the mitochondrion	Down	0.770925	0.261447	1	-0.112867
tRNA modification in the mitochondrion	Down	0.770925	0.261447	1	-0.112867
Toll Like Receptor 3 (TLR3) Cascade	Up	0.770925	0.261859	8	0.186222
Transport of small molecules	Up	0.776365	0.26649	79	0.138645
trans-Golgi Network Vesicle Budding	Up	0.776365	0.267692	11	0.155917
Apoptotic cleavage of cellular proteins	Up	0.776365	0.268913	8	0.192856
Apoptotic cleavage of cell adhesion proteins	Up	0.776365	0.269258	2	0.347651
Regulation of TP53 Expression	Up	0.776365	0.269395	1	0.369469
MicroRNA (miRNA) biogenesis	Down	0.776365	0.271938	4	-0.129824
Activation of NMDA receptors and postsynaptic events	Up	0.776365	0.275236	11	0.195864
Glucose metabolism	Up	0.776365	0.275736	24	0.146111
Metabolism of lipids	Up	0.776365	0.276209	84	0.139225
Azathioprine ADME	Up	0.776365	0.278606	2	0.266857
SHC1 events in ERBB2 signaling	Down	0.776365	0.278939	1	-0.104466
SHC1 events in ERBB4 signaling	Down	0.776365	0.278939	1	-0.104466
Regulation of KIT signaling	Down	0.776365	0.278939	1	-0.104466
GRB2 events in EGFR signaling	Down	0.776365	0.278939	1	-0.104466
SHC1 events in EGFR signaling	Down	0.776365	0.278939	1	-0.104466
GRB2 events in ERBB2 signaling	Down	0.776365	0.278939	1	-0.104466
PI3K events in ERBB2 signaling	Down	0.776365	0.278939	1	-0.104466
DAP12 interactions	Down	0.776365	0.278939	1	-0.104466
EGFR Transactivation by Gastrin	Down	0.776365	0.278939	1	-0.104466
DAP12 signaling	Down	0.776365	0.278939	1	-0.104466
SHC-related events triggered by IGF1R	Down	0.776365	0.278939	1	-0.104466
SHC-mediated cascade:FGFR1	Down	0.776365	0.278939	1	-0.104466
SHC-mediated cascade:FGFR2	Down	0.776365	0.278939	1	-0.104466
SHC-mediated cascade:FGFR3	Down	0.776365	0.278939	1	-0.104466
SHC-mediated cascade:FGFR4	Down	0.776365	0.278939	1	-0.104466
Signaling by FGFR4 in disease	Down	0.776365	0.278939	1	-0.104466
Signaling by FGFR3 in disease	Down	0.776365	0.278939	1	-0.104466
MET activates RAS signaling	Down	0.776365	0.278939	1	-0.104466
MET activates PI3K/AKT signaling	Down	0.776365	0.278939	1	-0.104466
Activated NTRK2 signals through RAS	Down	0.776365	0.278939	1	-0.104466
Activated NTRK2 signals through PI3K	Down	0.776365	0.278939	1	-0.104466
Activated NTRK3 signals through RAS	Down	0.776365	0.278939	1	-0.104466
WNT ligand biogenesis and trafficking	Up	0.779535	0.282249	3	0.23584
Metabolism of vitamin K	Up	0.779535	0.284673	2	0.2906
Nef Mediated CD4 Down-regulation	Up	0.779535	0.286534	2	0.255903
Nef Mediated CD8 Down-regulation	Up	0.779535	0.286534	2	0.255903
Trafficking of AMPA receptors	Up	0.779535	0.286534	2	0.255903
Glutamate binding, activation of AMPA receptors and synaptic plasticity	Up	0.779535	0.286534	2	0.255903
Trafficking of GluR2-containing AMPA receptors	Up	0.779535	0.286534	2	0.255903
Laminin interactions	Up	0.779535	0.286838	7	0.224285
Regulation of PLK1 Activity at G2/M Transition	Up	0.779535	0.289289	13	0.175589
Cholesterol biosynthesis	Down	0.779535	0.289366	4	-0.0135699
Glycolysis	Up	0.779535	0.29198	20	0.14895
Deactivation of the beta-catenin transactivating complex	Up	0.779535	0.293047	2	0.278964
Estrogen-dependent nuclear events downstream of ESR-membrane signaling	Up	0.779535	0.293047	2	0.278964
HS-GAG biosynthesis	Down	0.779535	0.29348	1	-0.0858755
HS-GAG degradation	Down	0.779535	0.29348	1	-0.0858755
Defective EXT2 causes exostoses 2	Down	0.779535	0.29348	1	-0.0858755
Defective EXT1 causes exostoses 1, TRPS2 and CHDS	Down	0.779535	0.29348	1	-0.0858755
Arachidonic acid metabolism	Up	0.779535	0.295563	5	0.228663
HIV Transcription Initiation	Down	0.779535	0.295926	2	-0.0423239
RNA Polymerase II HIV Promoter Escape	Down	0.779535	0.295926	2	-0.0423239
RNA Polymerase II Promoter Escape	Down	0.779535	0.295926	2	-0.0423239
RNA Polymerase II Transcription Pre-Initiation And Promoter Opening	Down	0.779535	0.295926	2	-0.0423239
RNA Polymerase II Transcription Initiation	Down	0.779535	0.295926	2	-0.0423239
RNA Polymerase II Transcription Initiation And Promoter Clearance	Down	0.779535	0.295926	2	-0.0423239
Signaling by ERBB2 in Cancer	Down	0.779535	0.296328	2	-0.0452347
Constitutive Signaling by Ligand-Responsive EGFR Cancer Variants	Down	0.779535	0.296328	2	-0.0452347
Signaling by EGFR in Cancer	Down	0.779535	0.296328	2	-0.0452347
Constitutive Signaling by EGFRvIII	Down	0.779535	0.296328	2	-0.0452347
Signaling by EGFRvIII in Cancer	Down	0.779535	0.296328	2	-0.0452347
Signaling by Ligand-Responsive EGFR Variants in Cancer	Down	0.779535	0.296328	2	-0.0452347
Constitutive Signaling by Overexpressed ERBB2	Down	0.779535	0.296328	2	-0.0452347
Signaling by ERBB2 KD Mutants	Down	0.779535	0.296328	2	-0.0452347
Signaling by ERBB2 ECD mutants	Down	0.779535	0.296328	2	-0.0452347
Signaling by ERBB2 TMD/JMD mutants	Down	0.779535	0.296328	2	-0.0452347
Processing of Capped Intron-Containing Pre-mRNA	Down	0.780842	0.297304	49	0.0488522
Diseases of glycosylation	Up	0.780859	0.297789	9	0.209775
MyD88-independent TLR4 cascade	Up	0.780868	0.29875	9	0.174876
TRIF(TICAM1)-mediated TLR4 signaling	Up	0.780868	0.29875	9	0.174876
Interactions of Vpr with host cellular proteins	Down	0.781374	0.299423	8	-0.0281128
Transport of bile salts and organic acids, metal ions and amine compounds	Down	0.783108	0.301534	1	-0.114611
Proton-coupled monocarboxylate transport	Down	0.783108	0.301534	1	-0.114611
Toll Like Receptor 9 (TLR9) Cascade	Up	0.783108	0.302266	9	0.171121
SOS-mediated signalling	Down	0.783108	0.303359	2	-0.0402819
Inhibition of the proteolytic activity of APC/C required for the onset of anaphase by mitotic spindle checkpoint components	Up	0.783108	0.303778	2	0.243367
Inactivation of APC/C via direct inhibition of the APC/C complex	Up	0.783108	0.303778	2	0.243367
APC-Cdc20 mediated degradation of Nek2A	Up	0.783108	0.303778	2	0.243367
MET activates RAP1 and RAC1	Up	0.783108	0.303973	4	0.243957
Cargo trafficking to the periciliary membrane	Up	0.783108	0.305162	6	0.221811
Prolactin receptor signaling	Up	0.783108	0.30526	3	0.19054
Ca2+ pathway	Up	0.783108	0.305418	6	0.20513
Signaling by ERBB4	Down	0.783108	0.306305	4	0.00335273
CREB phosphorylation	Up	0.783108	0.306329	2	0.258203
Tristetraprolin (TTP, ZFP36) binds and destabilizes mRNA	Up	0.783506	0.306965	4	0.190406
Presynaptic depolarization and calcium channel opening	Up	0.788343	0.309344	1	0.277949
MAPK targets/ Nuclear events mediated by MAP kinases	Up	0.790809	0.313534	4	0.200596
Telomere Maintenance	Down	0.790809	0.313609	9	-0.0492558
Chromosome Maintenance	Down	0.790809	0.313609	9	-0.0492558
Negative regulation of MET activity	Down	0.790809	0.313808	3	-0.0115515
InlB-mediated entry of Listeria monocytogenes into host cell	Down	0.790809	0.313808	3	-0.0115515
Listeria monocytogenes entry into host cells	Down	0.790809	0.313808	3	-0.0115515
Separation of Sister Chromatids	Up	0.790809	0.314734	42	0.162249
Ketone body metabolism	Down	0.790809	0.315928	3	-0.0270897
Utilization of Ketone Bodies	Down	0.790809	0.315928	3	-0.0270897
Organelle biogenesis and maintenance	Up	0.790809	0.316402	48	0.149386
RNA polymerase II transcribes snRNA genes	Up	0.790809	0.316681	3	0.196932
Erythrocytes take up carbon dioxide and release oxygen	Up	0.790809	0.316788	3	0.269756
O2/CO2 exchange in erythrocytes	Up	0.790809	0.316788	3	0.269756
RHO GTPases activate IQGAPs	Up	0.790809	0.317209	7	0.230904
Interleukin-9 signaling	Up	0.790809	0.318069	3	0.224963
Interleukin-21 signaling	Up	0.790809	0.318069	3	0.224963
mRNA Splicing - Major Pathway	Down	0.795475	0.322114	42	0.0546479
mRNA Splicing	Down	0.795475	0.322114	42	0.0546479
Methylation	Up	0.795475	0.322285	3	0.226015
Negative regulation of MAPK pathway	Up	0.795475	0.322966	6	0.182963
Transcriptional regulation by RUNX1	Down	0.795475	0.323367	27	0.0312645
mTORC1-mediated signalling	Up	0.795475	0.324161	5	0.186626
The role of Nef in HIV-1 replication and disease pathogenesis	Up	0.795475	0.324248	4	0.203915
Purinergic signaling in leishmaniasis infection	Down	0.795475	0.324335	5	-0.000799478
Cell recruitment (pro-inflammatory response)	Down	0.795475	0.324335	5	-0.000799478
SARS-CoV-2-host interactions	Down	0.797814	0.326862	35	0.0563921
Metabolism of Angiotensinogen to Angiotensins	Up	0.797814	0.329312	2	0.33429
ESR-mediated signaling	Up	0.797814	0.329352	15	0.130044
Kinesins	Up	0.797814	0.330757	8	0.198836
The phototransduction cascade	Down	0.797814	0.332967	3	-0.0489682
Inactivation, recovery and regulation of the phototransduction cascade	Down	0.797814	0.332967	3	-0.0489682
SARS-CoV-2 Infection	Down	0.797814	0.333602	50	0.0630432
VEGFR2 mediated vascular permeability	Up	0.797814	0.334487	3	0.214721
Sensory processing of sound by outer hair cells of the cochlea	Up	0.797814	0.336139	9	0.182851
Signaling by the B Cell Receptor (BCR)	Down	0.797814	0.336679	28	0.0578575
Cyclin A/B1/B2 associated events during G2/M transition	Up	0.797814	0.33733	3	0.234684
RAS processing	Up	0.797814	0.338037	3	0.219607
Role of LAT2/NTAL/LAB on calcium mobilization	Down	0.797814	0.33822	2	-0.0239638
Visual phototransduction	Down	0.797814	0.338456	8	0.0292169
Protein ubiquitination	Up	0.797814	0.338902	14	0.153246
Estrogen-dependent gene expression	Down	0.797814	0.340269	8	-0.0505818
Assembly of the ORC complex at the origin of replication	Down	0.797814	0.340383	7	-0.0703296
Nuclear Events (kinase and transcription factor activation)	Up	0.797814	0.340453	6	0.180499
BBSome-mediated cargo-targeting to cilium	Up	0.797814	0.340628	3	0.227065
Regulation of PTEN localization	Up	0.797814	0.342088	1	0.254561
Butyrate Response Factor 1 (BRF1) binds and destabilizes mRNA	Up	0.797814	0.343534	3	0.193723
Respiratory electron transport, ATP synthesis by chemiosmotic coupling, and heat production by uncoupling proteins.	Down	0.797814	0.344534	57	0.0680974
FCERI mediated Ca+2 mobilization	Down	0.797814	0.344771	4	-0.00218348
NR1H3 & NR1H2 regulate gene expression linked to cholesterol transport and efflux	Down	0.797814	0.345305	4	0.00915047
Advanced glycosylation endproduct receptor signaling	Down	0.797814	0.345649	2	0.00362487
Signaling by Hippo	Up	0.797814	0.347185	1	0.247449
Nef mediated downregulation of CD28 cell surface expression	Up	0.797814	0.347599	1	0.288136
DCC mediated attractive signaling	Up	0.797814	0.347764	2	0.265086
Association of TriC/CCT with target proteins during biosynthesis	Up	0.797814	0.347828	6	0.18461
Effects of PIP2 hydrolysis	Up	0.797814	0.348171	3	0.197436
Mitotic G2-G2/M phases	Up	0.797814	0.348479	40	0.160775
G2/M Transition	Up	0.797814	0.348479	40	0.160775
Defective factor XII causes hereditary angioedema	Up	0.797814	0.348836	2	0.327411
Class I MHC mediated antigen processing & presentation	Up	0.797814	0.349266	64	0.154469
Depolymerization of the Nuclear Lamina	Down	0.797814	0.349421	5	-0.0110679
Post NMDA receptor activation events	Up	0.797814	0.349956	10	0.191549
Toll Like Receptor 10 (TLR10) Cascade	Up	0.797814	0.349997	7	0.17757
Toll Like Receptor 5 (TLR5) Cascade	Up	0.797814	0.349997	7	0.17757
Toll Like Receptor 7/8 (TLR7/8) Cascade	Up	0.797814	0.349997	7	0.17757
TRAF6 mediated induction of NFkB and MAP kinases upon TLR7/8 or 9 activation	Up	0.797814	0.349997	7	0.17757
MyD88 dependent cascade initiated on endosome	Up	0.797814	0.349997	7	0.17757
MyD88 cascade initiated on plasma membrane	Up	0.797814	0.349997	7	0.17757
E3 ubiquitin ligases ubiquitinate target proteins	Up	0.797814	0.350358	9	0.174481
LRR FLII-interacting protein 1 (LRRFIP1) activates type I IFN production	Down	0.797814	0.350973	1	-0.0755579
p38MAPK events	Up	0.797814	0.351332	4	0.193578
Gluconeogenesis	Up	0.797814	0.351792	9	0.16506
Inactivation of CDC42 and RAC1	Up	0.797814	0.35445	1	0.360194
Gamma-carboxylation of protein precursors	Up	0.797814	0.355541	1	0.354256
Transport of gamma-carboxylated protein precursors from the endoplasmic reticulum to the Golgi apparatus	Up	0.797814	0.355541	1	0.354256
Removal of aminoterminal propeptides from gamma-carboxylated proteins	Up	0.797814	0.355541	1	0.354256
Gamma-carboxylation, transport, and amino-terminal cleavage of proteins	Up	0.797814	0.355541	1	0.354256
Signaling by NOTCH1	Up	0.797814	0.356162	1	0.235443
NOTCH1 Intracellular Domain Regulates Transcription	Up	0.797814	0.356162	1	0.235443
Signaling by NOTCH1 PEST Domain Mutants in Cancer	Up	0.797814	0.356162	1	0.235443
Signaling by NOTCH1 in Cancer	Up	0.797814	0.356162	1	0.235443
FBXW7 Mutants and NOTCH1 in Cancer	Up	0.797814	0.356162	1	0.235443
Constitutive Signaling by NOTCH1 PEST Domain Mutants	Up	0.797814	0.356162	1	0.235443
Loss of Function of FBXW7 in Cancer and NOTCH1 Signaling	Up	0.797814	0.356162	1	0.235443
Signaling by NOTCH1 HD+PEST Domain Mutants in Cancer	Up	0.797814	0.356162	1	0.235443
Constitutive Signaling by NOTCH1 HD+PEST Domain Mutants	Up	0.797814	0.356162	1	0.235443
Regulation of BACH1 activity	Up	0.797814	0.356162	1	0.235443
RND2 GTPase cycle	Up	0.797814	0.356628	8	0.216759
RHOU GTPase cycle	Up	0.797814	0.357496	10	0.164472
RPIA deficiency: failed conversion of R5P to RU5P	Down	0.797814	0.357692	1	-0.0674322
RPIA deficiency: failed conversion of RU5P to R5P	Down	0.797814	0.357692	1	-0.0674322
Antigen Presentation: Folding, assembly and peptide loading of class I MHC	Up	0.797814	0.358155	4	0.196218
Regulation of TP53 Activity through Phosphorylation	Down	0.797814	0.358528	6	0.0247329
Signaling by FGFR2 in disease	Down	0.797814	0.359077	2	-0.0264934
Assembly and cell surface presentation of NMDA receptors	Up	0.797814	0.359138	5	0.23014
Mitochondrial tRNA aminoacylation	Up	0.797814	0.359553	7	0.173067
Basigin interactions	Up	0.797814	0.36078	2	0.202697
Interleukin-2 signaling	Up	0.797814	0.360997	1	0.252062
Erythropoietin activates STAT5	Up	0.797814	0.360997	1	0.252062
Activation of AMPK downstream of NMDARs	Up	0.798798	0.362861	7	0.216434
SUMOylation of SUMOylation proteins	Down	0.798798	0.363891	6	-0.0349544
SUMOylation of chromatin organization proteins	Down	0.798798	0.363891	6	-0.0349544
SUMOylation of RNA binding proteins	Down	0.798798	0.363891	6	-0.0349544
SUMOylation of DNA replication proteins	Down	0.798798	0.363891	6	-0.0349544
Lysine catabolism	Down	0.804951	0.367301	3	0.00366254
tRNA Aminoacylation	Up	0.804951	0.367682	15	0.150224
Nuclear Envelope Breakdown	Down	0.805856	0.368589	11	-0.000993537
Glutamate and glutamine metabolism	Up	0.808378	0.370238	1	0.304503
Cytosolic sulfonation of small molecules	Up	0.81097	0.371923	1	0.49474
Regulation of HSF1-mediated heat shock response	Up	0.812785	0.373591	16	0.124951
COPI-independent Golgi-to-ER retrograde traffic	Up	0.812785	0.37423	19	0.168091
Pyruvate metabolism	Up	0.812785	0.374428	11	0.161203
Abnormal conversion of 2-oxoglutarate to 2-hydroxyglutarate	Up	0.812785	0.375246	1	0.302797
NADPH regeneration	Up	0.812785	0.375246	1	0.302797
HSP90 chaperone cycle for steroid hormone receptors (SHR) in the presence of ligand	Up	0.814196	0.376397	19	0.167116
Sensory Perception	Down	0.822716	0.381935	21	0.0708892
Suppression of apoptosis	Up	0.822716	0.382354	1	0.246794
Maturation of nucleoprotein	Up	0.822716	0.382354	1	0.246794
Maturation of nucleoprotein	Up	0.822716	0.382354	1	0.246794
Interleukin-17 signaling	Up	0.823587	0.383768	5	0.181528
MAP kinase activation	Up	0.823587	0.383768	5	0.181528
Signaling by cytosolic FGFR1 fusion mutants	Down	0.830752	0.387616	7	0.0338521
Constitutive Signaling by Aberrant PI3K in Cancer	Down	0.831572	0.38881	3	0.00118384
Regulation of beta-cell development	Up	0.831572	0.389974	2	0.281428
Regulation of gene expression in beta cells	Up	0.831572	0.389974	2	0.281428
NR1H2 & NR1H3 regulate gene expression linked to triglyceride lipolysis in adipose	Up	0.831572	0.390038	1	0.40425
Intra-Golgi and retrograde Golgi-to-ER traffic	Up	0.835984	0.39262	42	0.150073
Unwinding of DNA	Up	0.837026	0.393623	1	0.464811
ARMS-mediated activation	Up	0.838408	0.394787	2	0.216572
Metabolism of nucleotides	Down	0.839911	0.39601	17	0.0502753
Epigenetic regulation of gene expression	Down	0.845865	0.399336	9	-0.0413332
Interleukin-20 family signaling	Up	0.847644	0.40149	4	0.189751
Role of second messengers in netrin-1 signaling	Up	0.847644	0.40151	1	0.269801
Signal attenuation	Down	0.847644	0.401734	4	0.0426937
Synthesis of PA	Up	0.851082	0.405198	5	0.156904
Sphingolipid de novo biosynthesis	Up	0.851082	0.408746	3	0.197103
Sphingolipid metabolism	Up	0.851082	0.408746	3	0.197103
DNA strand elongation	Up	0.851082	0.409348	2	0.29854
Galactose catabolism	Up	0.851082	0.410487	2	0.181328
Caspase activation via Dependence Receptors in the absence of ligand	Up	0.851082	0.410525	1	0.257761
Caspase activation via extrinsic apoptotic signalling pathway	Up	0.851082	0.410525	1	0.257761
Signaling by NTRK3 (TRKC)	Up	0.851082	0.411907	3	0.219382
Late SARS-CoV-2 Infection Events	Up	0.851082	0.412345	8	0.156323
PKB-mediated events	Up	0.851082	0.415821	1	0.28506
Downregulation of ERBB2:ERBB3 signaling	Up	0.851082	0.415821	1	0.28506
Activation of AKT2	Up	0.851082	0.415821	1	0.28506
PDE3B signalling	Up	0.851082	0.415821	1	0.28506
Inhibition of TSC complex formation by PKB	Up	0.851082	0.415821	1	0.28506
AKT phosphorylates targets in the nucleus	Up	0.851082	0.415821	1	0.28506
AKT-mediated inactivation of FOXO1A	Up	0.851082	0.415821	1	0.28506
CD28 dependent PI3K/Akt signaling	Up	0.851082	0.415821	1	0.28506
Regulation of TP53 Activity through Association with Co-factors	Up	0.851082	0.415821	1	0.28506
RUNX2 regulates genes involved in cell migration	Up	0.851082	0.415821	1	0.28506
Lipid particle organization	Up	0.851082	0.415915	2	0.283948
Glutathione conjugation	Up	0.851082	0.41625	8	0.180036
CTLA4 inhibitory signaling	Up	0.851082	0.420014	4	0.186511
Costimulation by the CD28 family	Up	0.851082	0.42029	8	0.170109
Synthesis of PIPs in the nucleus	Up	0.851082	0.420694	1	0.240498
Interferon Signaling	Up	0.851082	0.422205	20	0.147301
RHOBTB3 ATPase cycle	Up	0.851082	0.422927	2	0.19669
Energy dependent regulation of mTOR by LKB1-AMPK	Up	0.851082	0.425836	6	0.177208
PP2A-mediated dephosphorylation of key metabolic factors	Up	0.851082	0.42606	2	0.222682
Synthesis of Ketone Bodies	Down	0.851082	0.426266	2	-0.0249403
GAB1 signalosome	Down	0.851082	0.427737	2	-0.0101752
Tie2 Signaling	Down	0.851082	0.427737	2	-0.0101752
Downstream signaling of activated FGFR1	Down	0.851082	0.427737	2	-0.0101752
PI-3K cascade:FGFR1	Down	0.851082	0.427737	2	-0.0101752
FRS-mediated FGFR1 signaling	Down	0.851082	0.427737	2	-0.0101752
PI-3K cascade:FGFR2	Down	0.851082	0.427737	2	-0.0101752
Downstream signaling of activated FGFR2	Down	0.851082	0.427737	2	-0.0101752
FRS-mediated FGFR2 signaling	Down	0.851082	0.427737	2	-0.0101752
FRS-mediated FGFR3 signaling	Down	0.851082	0.427737	2	-0.0101752
Downstream signaling of activated FGFR3	Down	0.851082	0.427737	2	-0.0101752
PI-3K cascade:FGFR3	Down	0.851082	0.427737	2	-0.0101752
FRS-mediated FGFR4 signaling	Down	0.851082	0.427737	2	-0.0101752
Downstream signaling of activated FGFR4	Down	0.851082	0.427737	2	-0.0101752
PI-3K cascade:FGFR4	Down	0.851082	0.427737	2	-0.0101752
MET activates PTPN11	Down	0.851082	0.427737	2	-0.0101752
Signaling by NTRK2 (TRKB)	Down	0.851082	0.427737	2	-0.0101752
Activated NTRK2 signals through FRS2 and FRS3	Down	0.851082	0.427737	2	-0.0101752
Synthesis of bile acids and bile salts	Up	0.851082	0.427889	3	0.189328
Uptake and actions of bacterial toxins	Up	0.860548	0.433176	3	0.21092
MET promotes cell motility	Up	0.861177	0.434021	8	0.187163
RNA Polymerase II Pre-transcription Events	Down	0.864103	0.436025	6	0.0518198
Regulation of pyruvate dehydrogenase (PDH) complex	Up	0.86483	0.438141	6	0.164804
RAF activation	Up	0.86483	0.439059	8	0.157141
Cell surface interactions at the vascular wall	Up	0.86483	0.441204	13	0.130737
Apoptosis	Up	0.86483	0.442774	43	0.127347
Induction of Cell-Cell Fusion	Up	0.86483	0.443528	1	0.262481
RNA Polymerase II Transcription Termination	Down	0.86483	0.446755	11	0.0360923
Synthesis of Prostaglandins (PG) and Thromboxanes (TX)	Up	0.86483	0.447073	2	0.238381
Histidine catabolism	Up	0.86483	0.447612	1	0.318898
Regulation of cortical dendrite branching	Down	0.86483	0.449966	1	-0.0596367
Viral Messenger RNA Synthesis	Down	0.86483	0.451049	6	-0.0228115
VxPx cargo-targeting to cilium	Up	0.86483	0.453211	2	0.301456
Senescence-Associated Secretory Phenotype (SASP)	Down	0.86483	0.455247	7	-0.0555077
HSF1 activation	Up	0.86483	0.455471	3	0.157362
ERK/MAPK targets	Up	0.86483	0.455509	3	0.188051
Regulation of RUNX2 expression and activity	Down	0.86483	0.45552	24	0.0681876
FLT3 Signaling	Up	0.86483	0.455618	5	0.187788
RHO GTPases activate PKNs	Down	0.86483	0.456801	13	0.00163396
Lipophagy	Up	0.86483	0.459618	3	0.184782
Synthesis of Leukotrienes (LT) and Eoxins (EX)	Up	0.86483	0.46005	1	0.238231
activated TAK1 mediates p38 MAPK activation	Up	0.86483	0.46005	1	0.238231
RHO GTPases activate KTN1	Up	0.86483	0.46077	4	0.182644
Immunoregulatory interactions between a Lymphoid and a non-Lymphoid cell	Up	0.86483	0.461366	4	0.268074
Nef and signal transduction	Up	0.86483	0.461484	1	0.24347
Regulation of PAK-2p34 activity by PS-GAP/RHG10	Up	0.86483	0.461484	1	0.24347
Stimulation of the cell death response by PAK-2p34	Up	0.86483	0.461484	1	0.24347
Olfactory Signaling Pathway	Down	0.86483	0.462403	1	-0.0383855
Expression and translocation of olfactory receptors	Down	0.86483	0.462403	1	-0.0383855
TICAM1, RIP1-mediated IKK complex recruitment	Up	0.86483	0.463194	1	0.246781
APC/C:Cdc20 mediated degradation of Cyclin B	Up	0.86483	0.463194	1	0.246781
Conversion from APC/C:Cdc20 to APC/C:Cdh1 in late anaphase	Up	0.86483	0.463194	1	0.246781
Phosphorylation of the APC/C	Up	0.86483	0.463194	1	0.246781
Signaling by BMP	Up	0.86483	0.463194	1	0.246781
Transcriptional Regulation by VENTX	Up	0.86483	0.463194	1	0.246781
IKK complex recruitment mediated by RIP1	Up	0.86483	0.463194	1	0.246781
Diseases of mitotic cell cycle	Up	0.86483	0.463194	1	0.246781
Aberrant regulation of mitotic exit in cancer due to RB1 defects	Up	0.86483	0.463194	1	0.246781
Aberrant regulation of mitotic cell cycle due to RB1 defects	Up	0.86483	0.463194	1	0.246781
Synthesis of GDP-mannose	Up	0.86483	0.46327	2	0.197391
Factors involved in megakaryocyte development and platelet production	Up	0.86483	0.4633	20	0.167641
Fructose metabolism	Up	0.86483	0.463546	1	0.232756
Fructose biosynthesis	Up	0.86483	0.463546	1	0.232756
Generation of second messenger molecules	Up	0.86483	0.463589	3	0.17636
Initiation of Nuclear Envelope (NE) Reformation	Down	0.86483	0.463651	6	0.0210786
Transport of the SLBP independent Mature mRNA	Down	0.86483	0.46389	5	-0.0376696
Transport of the SLBP Dependant Mature mRNA	Down	0.86483	0.46389	5	-0.0376696
Transport of Mature mRNA Derived from an Intronless Transcript	Down	0.86483	0.46389	5	-0.0376696
Transport of Mature mRNAs Derived from Intronless Transcripts	Down	0.86483	0.46389	5	-0.0376696
Regulation of Glucokinase by Glucokinase Regulatory Protein	Down	0.86483	0.46389	5	-0.0376696
SUMOylation of ubiquitinylation proteins	Down	0.86483	0.46389	5	-0.0376696
SLC transporter disorders	Down	0.86483	0.46389	5	-0.0376696
Defective TPR may confer susceptibility towards thyroid papillary carcinoma (TPC)	Down	0.86483	0.46389	5	-0.0376696
Metabolic disorders of biological oxidation enzymes	Up	0.86483	0.463965	5	0.178447
Purine salvage	Up	0.865658	0.465275	5	0.158858
G2/M DNA damage checkpoint	Down	0.865658	0.465471	9	-0.0617317
rRNA modification in the mitochondrion	Down	0.870289	0.468934	1	-0.0471818
Interferon alpha/beta signaling	Up	0.870289	0.469296	6	0.164112
NFE2L2 regulating anti-oxidant/detoxification enzymes	Down	0.870289	0.469993	3	0.00442445
Nef-mediates down modulation of cell surface receptors by recruiting them to clathrin adapters	Up	0.870289	0.470283	3	0.19073
Transcriptional regulation of white adipocyte differentiation	Up	0.870289	0.47113	4	0.277584
SARS-CoV-1-host interactions	Down	0.870289	0.471606	24	0.0667267
MAPK1 (ERK2) activation	Up	0.870289	0.471696	2	0.212499
Signaling by FGFR in disease	Down	0.870888	0.473039	9	0.0507904
RNA Polymerase I Transcription Termination	Up	0.870888	0.473088	1	0.186169
RSK activation	Up	0.872047	0.47494	1	0.278175
Sealing of the nuclear envelope (NE) by ESCRT-III	Down	0.872047	0.4753	11	0.0660417
PKA-mediated phosphorylation of key metabolic factors	Up	0.872047	0.475322	1	0.263547
Signaling by ALK	Up	0.873811	0.476907	3	0.19359
Uptake and function of anthrax toxins	Up	0.873811	0.478658	2	0.223068
Negative feedback regulation of MAPK pathway	Up	0.873811	0.478658	2	0.223068
Signaling by MAP2K mutants	Up	0.873811	0.478658	2	0.223068
Synthesis of PC	Up	0.873811	0.478962	2	0.188591
Acyl chain remodelling of PC	Up	0.874234	0.480802	1	0.312403
Acyl chain remodelling of PS	Up	0.874234	0.480802	1	0.312403
Acyl chain remodelling of PE	Up	0.874234	0.480802	1	0.312403
Scavenging by Class A Receptors	Up	0.874614	0.481547	4	0.179675
Formation of Incision Complex in GG-NER	Down	0.875793	0.482733	9	0.0371514
COPII-mediated vesicle transport	Up	0.877167	0.48438	15	0.148553
Cellular response to heat stress	Up	0.877167	0.485718	20	0.118645
Bacterial Infection Pathways	Up	0.877167	0.486337	9	0.158768
HCMV Infection	Down	0.877167	0.488322	24	0.0435334
Glycerophospholipid catabolism	Up	0.877167	0.488948	1	0.266333
Defective PGM1 causes PGM1-CDG	Up	0.877167	0.488952	1	0.200836
Androgen biosynthesis	Up	0.877167	0.490003	1	0.264432
Antiviral mechanism by IFN-stimulated genes	Up	0.877167	0.490549	17	0.148677
Adherens junctions interactions	Up	0.877167	0.490694	2	0.187456
Cell-cell junction organization	Up	0.877167	0.490694	2	0.187456
FGFR1 mutant receptor activation	Down	0.877167	0.49096	8	0.0507044
Signaling by FGFR1 in disease	Down	0.877167	0.49096	8	0.0507044
mRNA 3'-end processing	Down	0.877167	0.49123	9	0.0351894
Transcription-Coupled Nucleotide Excision Repair (TC-NER)	Up	0.877167	0.491712	12	0.137409
ROBO receptors bind AKAP5	Up	0.877167	0.491866	1	0.199987
Nuclear signaling by ERBB4	Up	0.877167	0.492998	2	0.207109
Biotin transport and metabolism	Down	0.877167	0.493048	4	0.0439422
Signaling by SCF-KIT	Up	0.877167	0.493171	6	0.179452
Activation of NIMA Kinases NEK9, NEK6, NEK7	Up	0.877216	0.494589	1	0.232759
Plasma lipoprotein remodeling	Up	0.877216	0.49575	5	0.184156
Deadenylation-dependent mRNA decay	Up	0.877216	0.496227	7	0.168123
NPAS4 regulates expression of target genes	Up	0.877216	0.496486	1	0.272867
Response of EIF2AK1 (HRI) to heme deficiency	Down	0.877216	0.496551	2	0.0328864
CRMPs in Sema3A signaling	Up	0.877216	0.498775	1	0.334775
Growth hormone receptor signaling	Up	0.877216	0.500641	4	0.174698
CD28 co-stimulation	Up	0.877216	0.501548	5	0.179978
Insulin processing	Up	0.877216	0.503207	1	0.218328
Acyl chain remodeling of DAG and TAG	Up	0.877216	0.504076	1	0.216995
Arachidonate production from DAG	Up	0.877216	0.504076	1	0.216995
rRNA modification in the nucleus and cytosol	Down	0.877216	0.5044	4	0.0303003
Deadenylation of mRNA	Up	0.877216	0.50466	2	0.188067
SARS-CoV-2 activates/modulates innate and adaptive immune responses	Down	0.877216	0.506148	13	0.0411968
Formation of HIV elongation complex in the absence of HIV Tat	Down	0.877216	0.506222	2	0.00489547
HIV Transcription Elongation	Down	0.877216	0.506222	2	0.00489547
Formation of HIV-1 elongation complex containing HIV-1 Tat	Down	0.877216	0.506222	2	0.00489547
Pausing and recovery of Tat-mediated HIV elongation	Down	0.877216	0.506222	2	0.00489547
Tat-mediated HIV elongation arrest and recovery	Down	0.877216	0.506222	2	0.00489547
Tat-mediated elongation of the HIV-1 transcript	Down	0.877216	0.506222	2	0.00489547
HIV elongation arrest and recovery	Down	0.877216	0.506222	2	0.00489547
Pausing and recovery of HIV elongation	Down	0.877216	0.506222	2	0.00489547
TP53 Regulates Transcription of DNA Repair Genes	Down	0.877216	0.506222	2	0.00489547
snRNP Assembly	Down	0.877216	0.508455	9	0.0100021
Metabolism of non-coding RNA	Down	0.877216	0.508455	9	0.0100021
Defective OPLAH causes OPLAHD	Down	0.877216	0.509374	1	-0.0320701
Signaling by ALK in cancer	Up	0.877216	0.509499	15	0.133074
Signaling by ALK fusions and activated point mutants	Up	0.877216	0.509499	15	0.133074
NrCAM interactions	Up	0.877216	0.51035	1	0.342515
Neurofascin interactions	Up	0.877216	0.51035	1	0.342515
Unblocking of NMDA receptors, glutamate binding and activation	Down	0.877216	0.514199	1	-0.0672665
Ras activation upon Ca2+ influx through NMDA receptor	Down	0.877216	0.514199	1	-0.0672665
Long-term potentiation	Down	0.877216	0.514199	1	-0.0672665
Physiological factors	Up	0.877216	0.514223	1	0.36072
ATP sensitive Potassium channels	Down	0.877216	0.516269	1	-0.0323414
Defective ABCC9 causes CMD10, ATFB12 and Cantu syndrome	Down	0.877216	0.516269	1	-0.0323414
Platelet Adhesion to exposed collagen	Up	0.877216	0.516947	3	0.186557
Autophagy	Up	0.877216	0.517161	35	0.143915
NFE2L2 regulating TCA cycle genes	Up	0.877216	0.51975	2	0.206409
ABC-family proteins mediated transport	Down	0.877216	0.520024	26	0.0723781
Myogenesis	Up	0.877216	0.520951	3	0.200047
Mitochondrial iron-sulfur cluster biogenesis	Down	0.877216	0.521841	3	0.0223672
ER-Phagosome pathway	Up	0.877216	0.522802	27	0.173528
Golgi Cisternae Pericentriolar Stack Reorganization	Up	0.877216	0.522878	2	0.185956
Glycogen storage diseases	Up	0.877216	0.52354	4	0.185796
Disease	Down	0.877216	0.523811	242	0.0792401
Role of ABL in ROBO-SLIT signaling	Up	0.877216	0.525262	2	0.180296
NS1 Mediated Effects on Host Pathways	Down	0.877216	0.525484	8	0.0097096
Assembly of the pre-replicative complex	Down	0.877216	0.52606	29	0.057923
TNFR1-induced proapoptotic signaling	Down	0.877216	0.526269	2	0.0258795
Inactivation of CSF3 (G-CSF) signaling	Up	0.877216	0.527904	6	0.155572
Transcriptional Regulation by TP53	Up	0.877216	0.528985	41	0.123603
Formation of TC-NER Pre-Incision Complex	Up	0.877216	0.529346	11	0.137876
Metalloprotease DUBs	Up	0.877216	0.529519	3	0.16987
Ovarian tumor domain proteases	Up	0.877216	0.53053	6	0.158985
Transferrin endocytosis and recycling	Up	0.877216	0.536702	1	0.235799
Nucleotide salvage	Up	0.877216	0.536933	6	0.142572
Sema3A PAK dependent Axon repulsion	Up	0.877216	0.538814	2	0.179552
CD209 (DC-SIGN) signaling	Up	0.877216	0.538814	2	0.179552
Triglyceride metabolism	Up	0.877216	0.539421	9	0.148264
Metabolism of steroids	Up	0.877216	0.539768	18	0.134914
TP53 regulates transcription of additional cell cycle genes whose exact role in the p53 pathway remain uncertain	Up	0.877216	0.53987	1	0.212328
Signaling by WNT	Up	0.877216	0.540675	44	0.108958
Synthesis of IP3 and IP4 in the cytosol	Up	0.877216	0.541964	2	0.205127
Beta-catenin phosphorylation cascade	Up	0.877216	0.542445	2	0.188434
Disassembly of the destruction complex and recruitment of AXIN to the membrane	Up	0.877216	0.542445	2	0.188434
Signaling by AXIN mutants	Up	0.877216	0.542445	2	0.188434
Signaling by CTNNB1 phospho-site mutants	Up	0.877216	0.542445	2	0.188434
Signaling by APC mutants	Up	0.877216	0.542445	2	0.188434
Signaling by AMER1 mutants	Up	0.877216	0.542445	2	0.188434
Signaling by GSK3beta mutants	Up	0.877216	0.542445	2	0.188434
CTNNB1 S33 mutants aren't phosphorylated	Up	0.877216	0.542445	2	0.188434
CTNNB1 S37 mutants aren't phosphorylated	Up	0.877216	0.542445	2	0.188434
CTNNB1 S45 mutants aren't phosphorylated	Up	0.877216	0.542445	2	0.188434
CTNNB1 T41 mutants aren't phosphorylated	Up	0.877216	0.542445	2	0.188434
APC truncation mutants have impaired AXIN binding	Up	0.877216	0.542445	2	0.188434
AXIN missense mutants destabilize the destruction complex	Up	0.877216	0.542445	2	0.188434
Truncations of AMER1 destabilize the destruction complex	Up	0.877216	0.542445	2	0.188434
Respiratory electron transport	Down	0.877216	0.543015	48	0.07575
Diseases of carbohydrate metabolism	Up	0.877216	0.543515	6	0.164556
Vitamin D (calciferol) metabolism	Down	0.877216	0.543984	1	-0.0213782
SUMO is proteolytically processed	Down	0.877216	0.543984	1	-0.0213782
SUMOylation of transcription factors	Down	0.877216	0.543984	1	-0.0213782
SUMOylation of intracellular receptors	Down	0.877216	0.543984	1	-0.0213782
Josephin domain DUBs	Down	0.877216	0.545481	3	0.0308768
Signaling by Type 1 Insulin-like Growth Factor 1 Receptor (IGF1R)	Down	0.877216	0.545713	5	0.048784
IGF1R signaling cascade	Down	0.877216	0.545713	5	0.048784
IRS-related events triggered by IGF1R	Down	0.877216	0.545713	5	0.048784
Interleukin-7 signaling	Up	0.877216	0.547135	3	0.154454
Translation of Structural Proteins	Up	0.877216	0.549733	7	0.141157
XBP1(S) activates chaperone genes	Up	0.877216	0.551942	10	0.127503
IRE1alpha activates chaperones	Up	0.877216	0.551942	10	0.127503
Metabolism of steroid hormones	Up	0.877216	0.55295	3	0.170659
tRNA modification in the nucleus and cytosol	Up	0.877216	0.555638	1	0.210105
Metabolism of ingested SeMet, Sec, MeSec into H2Se	Up	0.877216	0.55746	1	0.213976
Defective AHCY causes HMAHCHD	Up	0.877216	0.55746	1	0.213976
Interleukin-35 Signalling	Up	0.877216	0.558296	2	0.211414
Interleukin-27 signaling	Up	0.877216	0.558296	2	0.211414
Heparan sulfate/heparin (HS-GAG) metabolism	Up	0.877216	0.560847	2	0.250307
Chondroitin sulfate/dermatan sulfate metabolism	Up	0.877216	0.560847	2	0.250307
A tetrasaccharide linker sequence is required for GAG synthesis	Up	0.877216	0.560847	2	0.250307
Defective B4GALT7 causes EDS, progeroid type	Up	0.877216	0.560847	2	0.250307
Defective B3GAT3 causes JDSSDHD	Up	0.877216	0.560847	2	0.250307
Defective B3GALT6 causes EDSP2 and SEMDJL1	Up	0.877216	0.560847	2	0.250307
Activation of NF-kappaB in B cells	Down	0.877216	0.561336	20	0.0730241
SCF-beta-TrCP mediated degradation of Emi1	Down	0.877216	0.561336	20	0.0730241
Vpu mediated degradation of CD4	Down	0.877216	0.561336	20	0.0730241
SCF(Skp2)-mediated degradation of p27/p21	Down	0.877216	0.561336	20	0.0730241
Autodegradation of the E3 ubiquitin ligase COP1	Down	0.877216	0.561336	20	0.0730241
Regulation of ornithine decarboxylase (ODC)	Down	0.877216	0.561336	20	0.0730241
Asymmetric localization of PCP proteins	Down	0.877216	0.561336	20	0.0730241
Degradation of AXIN	Down	0.877216	0.561336	20	0.0730241
Stabilization of p53	Down	0.877216	0.561336	20	0.0730241
p53-Dependent G1 DNA Damage Response	Down	0.877216	0.561336	20	0.0730241
p53-Dependent G1/S DNA damage checkpoint	Down	0.877216	0.561336	20	0.0730241
Ubiquitin Mediated Degradation of Phosphorylated Cdc25A	Down	0.877216	0.561336	20	0.0730241
p53-Independent DNA Damage Response	Down	0.877216	0.561336	20	0.0730241
p53-Independent G1/S DNA damage checkpoint	Down	0.877216	0.561336	20	0.0730241
G1/S DNA Damage Checkpoints	Down	0.877216	0.561336	20	0.0730241
Ubiquitin-dependent degradation of Cyclin D	Down	0.877216	0.561336	20	0.0730241
Transcriptional regulation by RUNX3	Down	0.877216	0.561336	20	0.0730241
Regulation of RUNX3 expression and activity	Down	0.877216	0.561336	20	0.0730241
Signaling by ERBB2	Down	0.877216	0.563053	5	0.0499051
HDR through Single Strand Annealing (SSA)	Down	0.877216	0.563656	2	-0.00665444
HDR through Homologous Recombination (HRR)	Down	0.877216	0.563656	2	-0.00665444
Homologous DNA Pairing and Strand Exchange	Down	0.877216	0.563656	2	-0.00665444
Presynaptic phase of homologous DNA pairing and strand exchange	Down	0.877216	0.563656	2	-0.00665444
Diseases of DNA repair	Down	0.877216	0.563656	2	-0.00665444
Diseases of DNA Double-Strand Break Repair	Down	0.877216	0.563656	2	-0.00665444
Defective homologous recombination repair (HRR) due to BRCA2 loss of function	Down	0.877216	0.563656	2	-0.00665444
Impaired BRCA2 binding to RAD51	Down	0.877216	0.563656	2	-0.00665444
SARS-CoV-1 activates/modulates innate immune responses	Up	0.8791	0.565409	6	0.128575
Cargo recognition for clathrin-mediated endocytosis	Up	0.8791	0.565944	14	0.128806
Signaling by MET	Up	0.880228	0.56721	12	0.153219
DNA Replication Pre-Initiation	Down	0.882404	0.569153	30	0.0604012
SUMOylation of transcription cofactors	Down	0.884035	0.570747	2	0.0112574
Cardiac conduction	Up	0.887618	0.573605	12	0.132349
Non-integrin membrane-ECM interactions	Up	0.889608	0.575597	7	0.180469
Regulation of TP53 Activity	Up	0.889608	0.575982	12	0.134696
Signaling by Hedgehog	Up	0.8912	0.577559	29	0.130899
Methionine salvage pathway	Down	0.893273	0.580382	4	0.0344875
alpha-linolenic (omega3) and linoleic (omega6) acid metabolism	Up	0.893273	0.5812	1	0.162802
alpha-linolenic acid (ALA) metabolism	Up	0.893273	0.5812	1	0.162802
Beta-oxidation of very long chain fatty acids	Up	0.893273	0.5812	1	0.162802
Transcriptional regulation by the AP-2 (TFAP2) family of transcription factors	Up	0.893273	0.583502	1	0.244788
Chylomicron clearance	Up	0.893273	0.583502	1	0.244788
Downstream signaling events of B Cell Receptor (BCR)	Down	0.893273	0.584837	23	0.0716176
Interleukin-37 signaling	Up	0.893273	0.589068	3	0.156827
RAF-independent MAPK1/3 activation	Up	0.893273	0.589119	4	0.170766
PKA-mediated phosphorylation of CREB	Up	0.893273	0.589308	1	0.189544
Calmodulin induced events	Up	0.893273	0.589308	1	0.189544
Ca-dependent events	Up	0.893273	0.589308	1	0.189544
CaM pathway	Up	0.893273	0.589308	1	0.189544
PLC beta mediated events	Up	0.893273	0.589308	1	0.189544
DAG and IP3 signaling	Up	0.893273	0.589308	1	0.189544
PKA activation	Up	0.893273	0.589308	1	0.189544
PKA activation in glucagon signalling	Up	0.893273	0.589308	1	0.189544
CREB1 phosphorylation through the activation of Adenylate Cyclase	Up	0.893273	0.589308	1	0.189544
ALK mutants bind TKIs	Up	0.893273	0.589308	1	0.189544
Beta-catenin independent WNT signaling	Up	0.89382	0.590616	30	0.12528
Triglyceride biosynthesis	Up	0.89382	0.590765	1	0.188047
G2/M Checkpoints	Down	0.894657	0.591867	31	0.0537459
Extension of Telomeres	Up	0.894666	0.592662	4	0.151532
Diseases of programmed cell death	Down	0.894666	0.59297	7	-0.0526071
Vif-mediated degradation of APOBEC3G	Down	0.895167	0.595501	23	0.074247
p75 NTR receptor-mediated signalling	Up	0.895167	0.59612	2	0.175817
Keratinization	Up	0.895167	0.5966	9	0.164204
Formation of the cornified envelope	Up	0.895167	0.5966	9	0.164204
Macroautophagy	Up	0.895167	0.598353	32	0.136693
Disorders of transmembrane transporters	Down	0.895167	0.598817	30	0.0683293
AUF1 (hnRNP D0) binds and destabilizes mRNA	Down	0.895167	0.600967	21	0.0754612
TCF dependent signaling in response to WNT	Down	0.895167	0.601683	30	0.0563298
Prefoldin mediated transfer of substrate to CCT/TriC	Down	0.895167	0.602362	14	0.092557
Cooperation of Prefoldin and TriC/CCT in actin and tubulin folding	Down	0.895167	0.602362	14	0.092557
BH3-only proteins associate with and inactivate anti-apoptotic BCL-2 members	Up	0.895167	0.604048	1	0.187399
Signalling to STAT3	Up	0.895167	0.604048	1	0.187399
POU5F1 (OCT4), SOX2, NANOG activate genes related to proliferation	Up	0.895167	0.604048	1	0.187399
Transcriptional regulation of pluripotent stem cells	Up	0.895167	0.604048	1	0.187399
Signaling by PTK6	Up	0.895167	0.604048	1	0.187399
PTK6 Activates STAT3	Up	0.895167	0.604048	1	0.187399
MET activates STAT3	Up	0.895167	0.604048	1	0.187399
Signaling by Non-Receptor Tyrosine Kinases	Up	0.895167	0.604048	1	0.187399
Interleukin-23 signaling	Up	0.895167	0.604048	1	0.187399
Signaling by Nuclear Receptors	Up	0.895167	0.604279	29	0.116454
Cell Cycle Checkpoints	Up	0.895276	0.605288	49	0.118411
RHOT2 GTPase cycle	Up	0.895276	0.605999	1	0.206996
Miro GTPase Cycle	Up	0.895276	0.605999	1	0.206996
N-glycan trimming in the ER and Calnexin/Calreticulin cycle	Up	0.895318	0.607091	7	0.140779
DARPP-32 events	Up	0.895318	0.607125	4	0.135374
Interleukin receptor SHC signaling	Down	0.896376	0.608393	2	0.0429165
Peroxisomal protein import	Up	0.896416	0.60897	12	0.130586
Pyruvate metabolism and Citric Acid (TCA) cycle	Up	0.899953	0.612374	25	0.1275
Cristae formation	Down	0.899953	0.612639	17	0.0803444
Glutathione synthesis and recycling	Down	0.899953	0.613027	2	0.0429192
Cytosolic tRNA aminoacylation	Up	0.900097	0.615817	9	0.133139
Mitochondrial biogenesis	Down	0.900097	0.616862	27	0.0836279
Transport of Ribonucleoproteins into the Host Nucleus	Down	0.900097	0.617121	6	-5.09599e-05
Uncoating of the HIV Virion	Up	0.900097	0.617706	1	0.14753
Reverse Transcription of HIV RNA	Up	0.900097	0.617706	1	0.14753
Minus-strand DNA synthesis	Up	0.900097	0.617706	1	0.14753
Plus-strand DNA synthesis	Up	0.900097	0.617706	1	0.14753
Binding and entry of HIV virion	Up	0.900097	0.617706	1	0.14753
Signaling by Leptin	Up	0.900097	0.618999	4	0.13687
TGF-beta receptor signaling activates SMADs	Up	0.900097	0.619031	11	0.131617
TRAF3-dependent IRF activation pathway	Down	0.900097	0.620852	2	0.0205755
TRAF6 mediated IRF7 activation	Down	0.900097	0.620852	2	0.0205755
TRAF6 mediated NF-kB activation	Down	0.900097	0.620852	2	0.0205755
NF-kB activation through FADD/RIP-1 pathway mediated by caspase-8 and -10	Down	0.900097	0.620852	2	0.0205755
Synthesis of bile acids and bile salts via 7alpha-hydroxycholesterol	Up	0.901823	0.622595	2	0.165551
The citric acid (TCA) cycle and respiratory electron transport	Down	0.902832	0.623863	80	0.0865559
CD22 mediated BCR regulation	Down	0.902832	0.624399	2	0.0363926
Collagen biosynthesis and modifying enzymes	Down	0.9036	0.625484	4	0.0531965
Retinoid metabolism and transport	Down	0.904272	0.628839	5	0.0761281
Defective GALK1 causes GALCT2	Up	0.904272	0.633155	1	0.161821
Signaling by WNT in cancer	Up	0.904272	0.633942	3	0.158558
Synthesis of IP2, IP, and Ins in the cytosol	Down	0.904272	0.634062	1	0.00136373
Dual incision in TC-NER	Up	0.904272	0.634689	8	0.122935
Gap-filling DNA repair synthesis and ligation in TC-NER	Up	0.904272	0.634689	8	0.122935
Assembly of collagen fibrils and other multimeric structures	Up	0.904272	0.635063	4	0.139712
Synthesis of Dolichyl-phosphate	Down	0.904272	0.635211	1	0.00219869
Attachment and Entry	Down	0.904272	0.635825	2	0.0444401
Heme signaling	Up	0.904272	0.637157	5	0.190399
Platelet sensitization by LDL	Up	0.904272	0.638489	3	0.153661
Triglyceride catabolism	Up	0.904272	0.638798	8	0.143291
Nuclear Envelope (NE) Reassembly	Down	0.904272	0.639668	22	0.0697554
TYSND1 cleaves peroxisomal proteins	Down	0.904272	0.641115	2	0.033646
mRNA decay by 5' to 3' exoribonuclease	Up	0.904272	0.641313	3	0.171702
RHOBTB1 GTPase cycle	Down	0.904272	0.6417	9	0.066029
Transcriptional Regulation by NPAS4	Up	0.904272	0.642407	2	0.173648
Dectin-1 mediated noncanonical NF-kB signaling	Down	0.904272	0.64294	22	0.0794203
TNFR2 non-canonical NF-kB pathway	Down	0.904272	0.64294	22	0.0794203
NIK-->noncanonical NF-kB signaling	Down	0.904272	0.64294	22	0.0794203
NOSTRIN mediated eNOS trafficking	Up	0.904272	0.643061	1	0.185047
NR1H2 and NR1H3-mediated signaling	Down	0.904272	0.643518	5	0.0881704
Negative regulators of DDX58/IFIH1 signaling	Down	0.904272	0.645441	6	0.0588219
Bicarbonate transporters	Down	0.904272	0.645531	1	0.00400342
Metabolism of cofactors	Up	0.904272	0.645662	5	0.152249
Transport of inorganic cations/anions and amino acids/oligopeptides	Down	0.904272	0.645968	2	0.0236346
Nicotinate metabolism	Up	0.904272	0.646343	3	0.147897
Glycogen storage disease type XV (GYG1)	Down	0.904272	0.647495	2	0.0432865
Glycogen storage disease type 0 (muscle GYS1)	Down	0.904272	0.647495	2	0.0432865
Activation of C3 and C5	Up	0.904272	0.648078	2	0.260775
Nitric oxide stimulates guanylate cyclase	Down	0.904272	0.648954	2	0.0236272
cGMP effects	Down	0.904272	0.648954	2	0.0236272
Synthesis of UDP-N-acetyl-glucosamine	Up	0.904272	0.649519	3	0.166001
Initial triggering of complement	Up	0.904272	0.650046	5	0.20576
Metabolism of nitric oxide: NOS3 activation and regulation	Up	0.904272	0.651112	5	0.141727
Amyloid fiber formation	Up	0.904272	0.651868	10	0.102684
Recognition of DNA damage by PCNA-containing replication complex	Up	0.904272	0.652314	5	0.122485
Interleukin-6 signaling	Up	0.904272	0.652341	3	0.168981
Interleukin-6 family signaling	Up	0.904272	0.652341	3	0.168981
HATs acetylate histones	Down	0.904272	0.653049	5	-0.0411686
Interleukin-2 family signaling	Up	0.904272	0.655106	5	0.152145
Membrane binding and targetting of GAG proteins	Down	0.904272	0.65542	2	0.0322058
Synthesis And Processing Of GAG, GAGPOL Polyproteins	Down	0.904272	0.65542	2	0.0322058
Other interleukin signaling	Up	0.904272	0.655641	2	0.148581
Anchoring fibril formation	Down	0.904272	0.661191	1	0.0150122
RUNX2 regulates osteoblast differentiation	Down	0.904272	0.661191	1	0.0150122
RUNX2 regulates bone development	Down	0.904272	0.661191	1	0.0150122
Telomere Extension By Telomerase	Up	0.904272	0.661405	3	0.157953
Death Receptor Signaling	Up	0.904272	0.66408	8	0.134608
Atorvastatin ADME	Up	0.904272	0.664962	1	0.32427
Degradation of the extracellular matrix	Up	0.904272	0.665771	16	0.132698
PI5P, PP2A and IER3 Regulate PI3K/AKT Signaling	Down	0.904272	0.66631	7	0.064298
Programmed Cell Death	Up	0.904272	0.667301	52	0.113194
Downregulation of TGF-beta receptor signaling	Up	0.904272	0.670299	7	0.132347
Interleukin-3, Interleukin-5 and GM-CSF signaling	Up	0.904272	0.676198	5	0.133413
Autodegradation of Cdh1 by Cdh1:APC/C	Down	0.904272	0.676402	21	0.0812982
APC/C:Cdc20 mediated degradation of Securin	Down	0.904272	0.676402	21	0.0812982
APC/C:Cdh1 mediated degradation of Cdc20 and other APC/C:Cdh1 targeted proteins in late mitosis/early G1	Down	0.904272	0.676402	21	0.0812982
CDK-mediated phosphorylation and removal of Cdc6	Down	0.904272	0.676402	21	0.0812982
Inhibition of replication initiation of damaged DNA by RB1/E2F1	Up	0.904272	0.676712	1	0.181816
MASTL Facilitates Mitotic Progression	Up	0.904272	0.676712	1	0.181816
Cyclin D associated events in G1	Up	0.904272	0.676712	1	0.181816
G1 Phase	Up	0.904272	0.676712	1	0.181816
Regulation of Apoptosis	Down	0.904272	0.676814	21	0.0811405
Regulation of activated PAK-2p34 by proteasome mediated degradation	Down	0.904272	0.676814	21	0.0811405
Defects in vitamin and cofactor metabolism	Up	0.904272	0.677368	4	0.16523
TNFR1-mediated ceramide production	Up	0.904272	0.677466	1	0.186974
ERKs are inactivated	Up	0.904272	0.677964	2	0.142989
Inhibition of nitric oxide production	Up	0.904272	0.677994	1	0.188042
DNA Replication	Down	0.904272	0.68117	31	0.0660477
Ub-specific processing proteases	Up	0.904272	0.681941	36	0.0969508
RHO GTPases activate CIT	Down	0.904272	0.682368	5	0.0732483
Sensory processing of sound by inner hair cells of the cochlea	Down	0.904272	0.68358	11	0.0928645
Defective SERPING1 causes hereditary angioedema	Up	0.904272	0.683952	1	0.300566
TP53 regulates transcription of several additional cell death genes whose specific roles in p53-dependent apoptosis remain uncertain	Up	0.904272	0.68458	1	0.168362
Spry regulation of FGF signaling	Down	0.904272	0.684735	3	0.053822
Negative regulation of FGFR1 signaling	Down	0.904272	0.684735	3	0.053822
Negative regulation of FGFR2 signaling	Down	0.904272	0.684735	3	0.053822
Negative regulation of FGFR3 signaling	Down	0.904272	0.684735	3	0.053822
Negative regulation of FGFR4 signaling	Down	0.904272	0.684735	3	0.053822
Signaling by FGFR1	Down	0.904272	0.684735	3	0.053822
Signaling by FGFR3	Down	0.904272	0.684735	3	0.053822
Signaling by FGFR4	Down	0.904272	0.684735	3	0.053822
Amino acids regulate mTORC1	Up	0.904272	0.684793	5	0.147978
RORA activates gene expression	Up	0.904272	0.685815	1	0.224691
BMAL1:CLOCK,NPAS2 activates circadian gene expression	Up	0.904272	0.685815	1	0.224691
Synthesis of active ubiquitin: roles of E1 and E2 enzymes	Up	0.904272	0.68593	7	0.116348
Signaling by TGF-beta Receptor Complex	Up	0.904272	0.686852	15	0.124143
Signaling by TGFB family members	Up	0.904272	0.686852	15	0.124143
CHL1 interactions	Up	0.904272	0.686949	2	0.210001
Regulation of cholesterol biosynthesis by SREBP (SREBF)	Up	0.904272	0.687184	9	0.134623
Ion homeostasis	Up	0.904272	0.687738	11	0.111588
Cyclin E associated events during G1/S transition	Down	0.904272	0.688205	21	0.083121
Cyclin A:Cdk2-associated events at S phase entry	Down	0.904272	0.688205	21	0.083121
Drug-mediated inhibition of ERBB2 signaling	Down	0.904272	0.68843	1	0.0139966
Drug resistance in ERBB2 KD mutants	Down	0.904272	0.68843	1	0.0139966
Resistance of ERBB2 KD mutants to trastuzumab	Down	0.904272	0.68843	1	0.0139966
Resistance of ERBB2 KD mutants to sapitinib	Down	0.904272	0.68843	1	0.0139966
Resistance of ERBB2 KD mutants to tesevatinib	Down	0.904272	0.68843	1	0.0139966
Resistance of ERBB2 KD mutants to neratinib	Down	0.904272	0.68843	1	0.0139966
Resistance of ERBB2 KD mutants to osimertinib	Down	0.904272	0.68843	1	0.0139966
Resistance of ERBB2 KD mutants to afatinib	Down	0.904272	0.68843	1	0.0139966
Resistance of ERBB2 KD mutants to AEE788	Down	0.904272	0.68843	1	0.0139966
Resistance of ERBB2 KD mutants to lapatinib	Down	0.904272	0.68843	1	0.0139966
Drug resistance in ERBB2 TMD/JMD mutants	Down	0.904272	0.68843	1	0.0139966
CLEC7A (Dectin-1) signaling	Down	0.904272	0.69079	25	0.0813288
Synthesis of 5-eicosatetraenoic acids	Up	0.904272	0.692205	2	0.21416
Signaling by NOTCH	Down	0.904272	0.692445	30	0.0613382
Metabolism of polyamines	Down	0.904272	0.693327	21	0.0815535
Nuclear Pore Complex (NPC) Disassembly	Down	0.904272	0.694293	6	0.0074018
HCMV Early Events	Up	0.904272	0.694695	14	0.0822422
TAK1-dependent IKK and NF-kappa-B activation	Up	0.904272	0.695168	2	0.167676
Regulation of NF-kappa B signaling	Up	0.904272	0.695168	2	0.167676
CLEC7A (Dectin-1) induces NFAT activation	Down	0.904272	0.69614	2	0.0195968
Creatine metabolism	Up	0.904272	0.696864	2	0.152761
Antigen processing: Ubiquitination & Proteasome degradation	Down	0.904272	0.696965	51	0.0856783
RND1 GTPase cycle	Down	0.904272	0.698248	6	0.0797305
Cytochrome P450 - arranged by substrate type	Down	0.904272	0.699422	1	0.0147891
Endogenous sterols	Down	0.904272	0.699422	1	0.0147891
Electron transport from NADPH to Ferredoxin	Down	0.904272	0.699422	1	0.0147891
Defective CYP11A1 causes AICSR	Down	0.904272	0.699422	1	0.0147891
PI5P Regulates TP53 Acetylation	Down	0.904272	0.70091	2	0.0447961
p75NTR signals via NF-kB	Down	0.904272	0.70224	1	0.0161636
Cell death signalling via NRAGE, NRIF and NADE	Down	0.904272	0.70224	1	0.0161636
NRIF signals cell death from the nucleus	Down	0.904272	0.70224	1	0.0161636
p75NTR recruits signalling complexes	Down	0.904272	0.70224	1	0.0161636
NF-kB is activated and signals survival	Down	0.904272	0.70224	1	0.0161636
Pexophagy	Down	0.904272	0.70224	1	0.0161636
Creation of C4 and C2 activators	Up	0.904272	0.704108	4	0.196212
Classical antibody-mediated complement activation	Up	0.904272	0.704108	4	0.196212
PI3K/AKT activation	Down	0.904272	0.704265	1	0.023902
Activated NTRK3 signals through PI3K	Down	0.904272	0.704265	1	0.023902
Degradation of GLI1 by the proteasome	Down	0.904272	0.704391	21	0.0807583
Degradation of GLI2 by the proteasome	Down	0.904272	0.704391	21	0.0807583
GLI3 is processed to GLI3R by the proteasome	Down	0.904272	0.704391	21	0.0807583
FBXL7 down-regulates AURKA during mitotic entry and in early mitosis	Down	0.904272	0.704391	21	0.0807583
Signaling by NOTCH4	Down	0.904272	0.704391	21	0.0807583
Negative regulation of NOTCH4 signaling	Down	0.904272	0.704391	21	0.0807583
GSK3B and BTRC:CUL1-mediated-degradation of NFE2L2	Down	0.904272	0.704391	21	0.0807583
Defective APRT disrupts adenine salvage	Up	0.904272	0.704678	1	0.18113
Nucleotide salvage defects	Up	0.904272	0.704678	1	0.18113
Diseases of nucleotide metabolism	Up	0.904272	0.704678	1	0.18113
Attachment and Entry	Up	0.904944	0.705756	1	0.174756
Metabolism	Down	0.907411	0.708498	384	0.0893718
Aspartate and asparagine metabolism	Up	0.907411	0.708793	2	0.150481
Insulin receptor signalling cascade	Down	0.907717	0.710328	6	0.0899917
Downstream signal transduction	Up	0.907717	0.711143	8	0.126242
Cell Cycle	Up	0.907717	0.712279	90	0.110114
Signaling by MRAS-complex mutants	Up	0.907717	0.712607	3	0.126022
SHOC2 M1731 mutant abolishes MRAS complex function	Up	0.907717	0.712607	3	0.126022
Gain-of-function MRAS complexes activate RAF signaling	Up	0.907717	0.712607	3	0.126022
Signaling by Erythropoietin	Up	0.907717	0.71403	3	0.130883
Regulation of PTEN stability and activity	Down	0.907717	0.715406	23	0.0861557
Ion influx/efflux at host-pathogen interface	Down	0.907717	0.715477	1	0.0198639
Uptake and function of diphtheria toxin	Up	0.907717	0.716284	1	0.186624
Synthesis of diphthamide-EEF2	Up	0.907717	0.716284	1	0.186624
Assembly of active LPL and LIPC lipase complexes	Down	0.907717	0.716338	2	0.0564366
Class I peroxisomal membrane protein import	Up	0.907717	0.716359	3	0.146465
Complement cascade	Up	0.907717	0.717968	15	0.149872
Regulation of Complement cascade	Up	0.907717	0.717968	15	0.149872
SLC-mediated transmembrane transport	Up	0.907717	0.718081	6	0.127363
Complex I biogenesis	Down	0.907717	0.719789	28	0.0792706
UCH proteinases	Down	0.907717	0.721001	26	0.0850313
SUMO is conjugated to E1 (UBA2:SAE1)	Down	0.907717	0.721675	2	0.0434983
SUMO is transferred from E1 to E2 (UBE2I, UBC9)	Down	0.907717	0.721675	2	0.0434983
Processing and activation of SUMO	Down	0.907717	0.721675	2	0.0434983
Glycogen storage disease type II (GAA)	Up	0.907717	0.721812	2	0.18615
NCAM1 interactions	Down	0.907717	0.722814	2	-0.0213466
Signalling to RAS	Up	0.907717	0.723053	5	0.13397
CD28 dependent Vav1 pathway	Up	0.907717	0.723788	4	0.153708
IRS activation	Down	0.907717	0.723913	3	0.0917469
KEAP1-NFE2L2 pathway	Up	0.907717	0.726236	35	0.11323
SLBP independent Processing of Histone Pre-mRNAs	Down	0.907717	0.726656	2	0.0401553
SLBP Dependent Processing of Replication-Dependent Histone Pre-mRNAs	Down	0.907717	0.726656	2	0.0401553
RET signaling	Up	0.907717	0.726919	4	0.182139
Protein methylation	Down	0.907717	0.727577	4	0.0709811
mRNA Splicing - Minor Pathway	Down	0.907717	0.727621	11	0.0619945
Deubiquitination	Up	0.907717	0.728413	50	0.099822
Defective MPI causes MPI-CDG	Up	0.907717	0.729977	1	0.152442
Formation of the active cofactor, UDP-glucuronate	Down	0.907717	0.732204	1	0.0340397
PI3K Cascade	Down	0.907717	0.732651	4	0.0721529
IRS-mediated signalling	Down	0.907717	0.732651	4	0.0721529
Signaling by plasma membrane FGFR1 fusions	Up	0.907717	0.735321	1	0.16867
Cellular response to chemical stress	Up	0.907717	0.735791	63	0.115605
NOD1/2 Signaling Pathway	Down	0.907717	0.736844	1	0.0273249
Aflatoxin activation and detoxification	Up	0.907717	0.737747	2	0.132328
Sema4D in semaphorin signaling	Up	0.907717	0.738094	4	0.154584
EPHA-mediated growth cone collapse	Down	0.907717	0.739468	3	0.0798451
Sema4D induced cell migration and growth-cone collapse	Down	0.907717	0.739468	3	0.0798451
Processing of Intronless Pre-mRNAs	Up	0.907717	0.740878	2	0.143447
Fc epsilon receptor (FCERI) signaling	Down	0.907717	0.741681	28	0.0851306
5-Phosphoribose 1-diphosphate biosynthesis	Up	0.907717	0.742299	1	0.187128
Signaling by KIT in disease	Up	0.907717	0.743862	4	0.142606
Signaling by phosphorylated juxtamembrane, extracellular and kinase domain KIT mutants	Up	0.907717	0.743862	4	0.142606
Defects in biotin (Btn) metabolism	Down	0.907717	0.744611	3	0.0756266
Defective HLCS causes multiple carboxylase deficiency	Down	0.907717	0.744611	3	0.0756266
Protein folding	Up	0.907717	0.744677	20	0.137906
Plasmalogen biosynthesis	Down	0.907717	0.745443	1	0.038199
Wax and plasmalogen biosynthesis	Down	0.907717	0.745443	1	0.038199
DDX58/IFIH1-mediated induction of interferon-alpha/beta	Down	0.907717	0.745541	7	0.0718584
Mitophagy	Down	0.907717	0.74626	6	0.0615938
PINK1-PRKN Mediated Mitophagy	Down	0.907717	0.74626	6	0.0615938
Interleukin-1 signaling	Down	0.907717	0.747463	25	0.0861078
Translesion synthesis by REV1	Up	0.907717	0.74966	1	0.13227
Processive synthesis on the C-strand of the telomere	Up	0.907717	0.74966	1	0.13227
Telomere C-strand (Lagging Strand) Synthesis	Up	0.907717	0.74966	1	0.13227
Removal of the Flap Intermediate from the C-strand	Up	0.907717	0.74966	1	0.13227
Mismatch Repair	Up	0.907717	0.74966	1	0.13227
Mismatch repair (MMR) directed by MSH2:MSH6 (MutSalpha)	Up	0.907717	0.74966	1	0.13227
Mismatch repair (MMR) directed by MSH2:MSH3 (MutSbeta)	Up	0.907717	0.74966	1	0.13227
PCNA-Dependent Long Patch Base Excision Repair	Up	0.907717	0.74966	1	0.13227
Translesion synthesis by POLK	Up	0.907717	0.74966	1	0.13227
Translesion synthesis by POLI	Up	0.907717	0.74966	1	0.13227
Gap-filling DNA repair synthesis and ligation in GG-NER	Up	0.907717	0.74966	1	0.13227
Fanconi Anemia Pathway	Up	0.907717	0.74966	1	0.13227
Removal of the Flap Intermediate	Up	0.907717	0.74966	1	0.13227
Processive synthesis on the lagging strand	Up	0.907717	0.74966	1	0.13227
Lagging Strand Synthesis	Up	0.907717	0.74966	1	0.13227
RHO GTPases Activate ROCKs	Down	0.90864	0.750998	6	0.0803123
Recycling of eIF2:GDP	Down	0.90864	0.751536	4	0.0670699
Beta oxidation of decanoyl-CoA to octanoyl-CoA-CoA	Up	0.909877	0.754202	2	0.139337
Signaling by NOTCH3	Up	0.909877	0.754233	1	0.235429
NOTCH3 Intracellular Domain Regulates Transcription	Up	0.909877	0.754233	1	0.235429
Apoptotic execution phase	Up	0.910531	0.758128	14	0.116555
Formation of WDR5-containing histone-modifying complexes	Up	0.910531	0.758211	3	0.13249
Pyroptosis	Up	0.910531	0.758337	7	0.124009
Degradation of DVL	Down	0.910531	0.758979	22	0.084364
Hedgehog 'on' state	Down	0.910531	0.758979	22	0.084364
Formation of apoptosome	Up	0.910531	0.761312	1	0.168193
Cytochrome c-mediated apoptotic response	Up	0.910531	0.761312	1	0.168193
Regulation of the apoptosome activity	Up	0.910531	0.761312	1	0.168193
Activation of gene expression by SREBF (SREBP)	Down	0.910531	0.76224	5	0.0830622
Biosynthesis of the N-glycan precursor (dolichol lipid-linked oligosaccharide, LLO) and transfer to a nascent protein	Up	0.910531	0.762292	9	0.139895
Synthesis of substrates in N-glycan biosythesis	Up	0.910531	0.762292	9	0.139895
Formation of RNA Pol II elongation complex	Down	0.910531	0.762921	5	0.0894091
RNA Polymerase II Transcription Elongation	Down	0.910531	0.762921	5	0.0894091
S Phase	Up	0.910531	0.763257	26	0.120049
Propionyl-CoA catabolism	Up	0.910531	0.763908	4	0.155163
Maturation of spike protein	Up	0.910531	0.764013	6	0.123551
Mitochondrial calcium ion transport	Up	0.910531	0.764265	9	0.122228
Translation of Structural Proteins	Down	0.910974	0.765196	2	0.0492938
Regulation of glycolysis by fructose 2,6-bisphosphate metabolism	Up	0.913354	0.767755	3	0.13815
Pre-NOTCH Expression and Processing	Down	0.915166	0.769839	8	-0.0114008
Lysosome Vesicle Biogenesis	Up	0.91879	0.773451	4	0.116089
Nephrin family interactions	Down	0.919153	0.774651	4	0.113948
Synthesis of very long-chain fatty acyl-CoAs	Up	0.919153	0.774883	4	0.135186
ABC transporter disorders	Down	0.920551	0.776627	25	0.0895291
Global Genome Nucleotide Excision Repair (GG-NER)	Down	0.921803	0.778249	13	0.0769071
eNOS activation	Up	0.922631	0.780031	4	0.130897
Nucleotide Excision Repair	Down	0.922631	0.781341	17	0.0801992
TNFR1-induced NF-kappa-B signaling pathway	Down	0.922631	0.781701	3	0.0795777
Lysosomal oligosaccharide catabolism	Down	0.922631	0.78176	1	0.0376262
PKMTs methylate histone lysines	Down	0.922631	0.781776	1	0.0344169
Processing of SMDT1	Up	0.923622	0.783182	7	0.121809
Cell Cycle, Mitotic	Up	0.923888	0.783974	79	0.10852
Nicotinamide salvaging	Up	0.92529	0.785985	1	0.127453
Signaling by PDGF	Up	0.92529	0.787705	11	0.139465
DNA Damage Recognition in GG-NER	Down	0.92529	0.789799	10	0.0790043
EGFR downregulation	Down	0.92529	0.789828	5	0.0924103
APC/C-mediated degradation of cell cycle proteins	Down	0.92529	0.791729	22	0.0885097
Cdc20:Phospho-APC/C mediated degradation of Cyclin A	Down	0.92529	0.791729	22	0.0885097
Regulation of APC/C activators between G1/S and early anaphase	Down	0.92529	0.791729	22	0.0885097
APC/C:Cdc20 mediated degradation of mitotic proteins	Down	0.92529	0.791729	22	0.0885097
Activation of APC/C and APC/C:Cdc20 mediated degradation of mitotic proteins	Down	0.92529	0.791729	22	0.0885097
APC:Cdc20 mediated degradation of cell cycle proteins prior to satisfation of the cell cycle checkpoint	Down	0.92529	0.791729	22	0.0885097
Regulation of mitotic cell cycle	Down	0.92529	0.791729	22	0.0885097
Insertion of tail-anchored proteins into the endoplasmic reticulum membrane	Down	0.92529	0.792385	8	0.0882002
Alternative complement activation	Up	0.92529	0.792538	1	0.243953
Signaling by EGFR	Down	0.926845	0.794967	6	0.0910278
Activation of RAC1	Up	0.926845	0.795423	4	0.117361
Gastrin-CREB signalling pathway via PKC and MAPK	Down	0.926845	0.795575	2	0.0868544
GPVI-mediated activation cascade	Up	0.930244	0.799734	3	0.153107
Interaction between L1 and Ankyrins	Up	0.930244	0.800782	4	0.137161
Nuclear events mediated by NFE2L2	Up	0.930244	0.800893	30	0.109754
Nef mediated downregulation of MHC class I complex cell surface expression	Down	0.930244	0.801124	1	0.0603853
Neddylation	Down	0.930244	0.801344	50	0.0924384
Hedgehog 'off' state	Up	0.934018	0.805168	26	0.119363
Pregnenolone biosynthesis	Up	0.935285	0.807122	2	0.123773
Cargo concentration in the ER	Up	0.935285	0.808065	8	0.131374
NGF-stimulated transcription	Up	0.935285	0.808271	2	0.140305
Regulation of TP53 Activity through Methylation	Up	0.935285	0.808554	1	0.136544
Sialic acid metabolism	Down	0.935499	0.809313	3	0.121356
FCERI mediated MAPK activation	Down	0.935718	0.810076	4	0.0777939
Activation of PPARGC1A (PGC-1alpha) by phosphorylation	Down	0.936743	0.811538	2	0.0608921
Glucuronidation	Up	0.937174	0.814377	2	0.158481
Gene expression (Transcription)	Down	0.937174	0.814612	110	0.0787641
Cellular response to hypoxia	Down	0.937174	0.818497	24	0.089748
Oxygen-dependent proline hydroxylation of Hypoxia-inducible Factor Alpha	Down	0.937174	0.818497	24	0.089748
Hedgehog ligand biogenesis	Down	0.937174	0.819004	22	0.0905929
Hh mutants are degraded by ERAD	Down	0.937174	0.819004	22	0.0905929
Hh mutants abrogate ligand secretion	Down	0.937174	0.819004	22	0.0905929
C-type lectin receptors (CLRs)	Down	0.937174	0.819117	27	0.0886046
Metabolism of folate and pterines	Up	0.937174	0.820242	2	0.121951
Sensory processing of sound	Down	0.937174	0.820551	12	0.107777
mitochondrial fatty acid beta-oxidation of saturated fatty acids	Up	0.937174	0.821314	3	0.125011
FCERI mediated NF-kB activation	Down	0.937174	0.82233	23	0.090862
Detoxification of Reactive Oxygen Species	Down	0.937174	0.823444	14	0.0920774
Regulated Necrosis	Up	0.937174	0.823837	10	0.114889
Formation of the Early Elongation Complex	Down	0.937174	0.825612	1	0.0514792
Formation of the HIV-1 Early Elongation Complex	Down	0.937174	0.825612	1	0.0514792
RNA Pol II CTD phosphorylation and interaction with CE during HIV infection	Down	0.937174	0.825612	1	0.0514792
Abortive elongation of HIV-1 transcript in the absence of Tat	Down	0.937174	0.825612	1	0.0514792
FGFR2 mutant receptor activation	Down	0.937174	0.825612	1	0.0514792
PIWI-interacting RNA (piRNA) biogenesis	Down	0.937174	0.825612	1	0.0514792
mRNA Capping	Down	0.937174	0.825612	1	0.0514792
RNA Pol II CTD phosphorylation and interaction with CE	Down	0.937174	0.825612	1	0.0514792
Signaling by FGFR2 IIIa TM	Down	0.937174	0.825612	1	0.0514792
Synthesis of pyrophosphates in the cytosol	Down	0.937174	0.82682	1	0.0584743
FCGR3A-mediated IL10 synthesis	Up	0.937174	0.826831	4	0.150825
RHOBTB GTPase Cycle	Down	0.937174	0.826851	12	0.0834256
Ion channel transport	Up	0.938414	0.828863	14	0.103057
Myoclonic epilepsy of Lafora	Down	0.938414	0.829177	3	0.0805306
Choline catabolism	Down	0.938414	0.829671	1	0.0596782
Alanine metabolism	Up	0.939011	0.830774	1	0.139254
Reversible hydration of carbon dioxide	Up	0.942822	0.834724	2	0.125911
Metabolism of porphyrins	Up	0.942851	0.835906	3	0.132592
Heme degradation	Up	0.942851	0.835906	3	0.132592
Regulation of TNFR1 signaling	Up	0.943196	0.837368	6	0.120872
TNF signaling	Up	0.943196	0.837368	6	0.120872
Alpha-oxidation of phytanate	Up	0.944853	0.839419	2	0.14137
Disinhibition of SNARE formation	Up	0.945929	0.840954	2	0.118969
Interleukin-15 signaling	Up	0.945961	0.841563	3	0.111665
Degradation of beta-catenin by the destruction complex	Down	0.946389	0.844353	24	0.0904833
ATF4 activates genes in response to endoplasmic reticulum stress	Down	0.946389	0.846479	1	0.0477853
KSRP (KHSRP) binds and destabilizes mRNA	Down	0.946389	0.846479	1	0.0477853
Sodium/Calcium exchangers	Down	0.946389	0.84722	1	0.0432659
MET receptor recycling	Down	0.946389	0.847739	2	0.0702939
Erythropoietin activates RAS	Down	0.946389	0.847739	2	0.0702939
Regulation of signaling by CBL	Down	0.946389	0.847739	2	0.0702939
Host Interactions of HIV factors	Down	0.946389	0.848226	39	0.0812689
Regulation of IFNG signaling	Up	0.946389	0.849879	2	0.159772
Regulation of IFNA/IFNB signaling	Up	0.946389	0.849879	2	0.159772
Signaling by FGFR	Down	0.946389	0.850437	6	0.0678339
Signaling by FGFR2	Down	0.946389	0.850437	6	0.0678339
PPARA activates gene expression	Down	0.946389	0.853138	7	0.10103
Regulation of lipid metabolism by PPARalpha	Down	0.946389	0.853138	7	0.10103
Ethanol oxidation	Down	0.946389	0.854724	1	0.0563975
Collagen formation	Down	0.946389	0.854919	5	0.0753861
DNA Damage Bypass	Up	0.946389	0.855124	9	0.0992603
MECP2 regulates neuronal receptors and channels	Up	0.946389	0.855688	1	0.123689
Miscellaneous transport and binding events	Down	0.946389	0.856419	2	0.062874
Acyl chain remodeling of CL	Up	0.946389	0.85645	1	0.13456
Beta oxidation of myristoyl-CoA to lauroyl-CoA	Up	0.946389	0.85645	1	0.13456
mitochondrial fatty acid beta-oxidation of unsaturated fatty acids	Up	0.946389	0.85645	1	0.13456
Beta oxidation of lauroyl-CoA to decanoyl-CoA-CoA	Up	0.946389	0.85645	1	0.13456
Beta oxidation of octanoyl-CoA to hexanoyl-CoA	Up	0.946389	0.85645	1	0.13456
Beta oxidation of hexanoyl-CoA to butanoyl-CoA	Up	0.946389	0.85645	1	0.13456
Terminal pathway of complement	Down	0.948232	0.858699	4	0.116192
Downstream TCR signaling	Down	0.949277	0.860228	22	0.0924222
Signaling by Insulin receptor	Up	0.952662	0.863879	8	0.125808
RHOH GTPase cycle	Up	0.955472	0.869652	7	0.110333
Mitotic Metaphase and Anaphase	Up	0.955472	0.869838	56	0.116237
Mitotic Anaphase	Up	0.955472	0.869838	56	0.116237
Ubiquinol biosynthesis	Up	0.955472	0.870527	3	0.128383
RHOBTB2 GTPase cycle	Up	0.955472	0.870862	7	0.106158
Trafficking of myristoylated proteins to the cilium	Down	0.955472	0.870873	1	0.0467596
Pentose phosphate pathway disease	Up	0.955472	0.872171	2	0.122076
Synthesis of DNA	Up	0.955472	0.872398	25	0.113448
O-linked glycosylation	Down	0.955472	0.872475	2	0.151525
O-linked glycosylation of mucins	Down	0.955472	0.872475	2	0.151525
Defective CFTR causes cystic fibrosis	Down	0.955472	0.87401	23	0.0939875
VLDL assembly	Down	0.955472	0.875507	1	0.0973787
VLDL clearance	Down	0.955472	0.875507	1	0.0973787
RNA Polymerase II Transcription	Down	0.955472	0.875925	96	0.087734
Signaling by CSF3 (G-CSF)	Up	0.955472	0.876194	8	0.114135
PIP3 activates AKT signaling	Down	0.955472	0.876802	36	0.0942947
Sulfur amino acid metabolism	Down	0.955472	0.877339	8	0.0794958
Metabolism of fat-soluble vitamins	Up	0.955472	0.877425	7	0.137406
Regulation of TP53 Activity through Acetylation	Up	0.955472	0.878188	3	0.124884
HSF1-dependent transactivation	Down	0.955472	0.878706	4	0.099393
Activation of BMF and translocation to mitochondria	Up	0.955472	0.87873	1	0.106257
Nuclear import of Rev protein	Down	0.955561	0.879624	7	0.0374717
RND3 GTPase cycle	Up	0.955561	0.881159	5	0.149468
Activation of Matrix Metalloproteinases	Up	0.955561	0.881869	2	0.188186
Caspase-mediated cleavage of cytoskeletal proteins	Down	0.955561	0.882604	3	0.0582833
Synthesis of bile acids and bile salts via 24-hydroxycholesterol	Up	0.955561	0.882636	1	0.168299
Synthesis of bile acids and bile salts via 27-hydroxycholesterol	Up	0.955561	0.882636	1	0.168299
Chaperonin-mediated protein folding	Up	0.955561	0.882913	18	0.133262
Cytoprotection by HMOX1	Up	0.955932	0.884001	16	0.120395
Signaling by PDGFR in disease	Down	0.955932	0.885886	3	0.106121
Signaling by PDGFRA transmembrane, juxtamembrane and kinase domain mutants	Down	0.955932	0.885886	3	0.106121
Signaling by PDGFRA extracellular domain mutants	Down	0.955932	0.885886	3	0.106121
HDL assembly	Up	0.955932	0.886186	2	0.17973
Generic Transcription Pathway	Down	0.956382	0.887745	80	0.088111
Carnitine synthesis	Up	0.956382	0.887776	2	0.110212
DSCAM interactions	Down	0.956515	0.888486	2	0.0714789
Postmitotic nuclear pore complex (NPC) reformation	Up	0.956737	0.889279	7	0.0658833
Plasma lipoprotein assembly	Up	0.957159	0.890572	7	0.138779
PCP/CE pathway	Up	0.957159	0.891089	24	0.105318
Signal regulatory protein family interactions	Down	0.957159	0.891588	3	0.0789819
FGFR2 alternative splicing	Up	0.957159	0.892018	3	0.0818457
SARS-CoV Infections	Down	0.9576	0.893016	68	0.0932198
PTEN Regulation	Down	0.959894	0.896687	28	0.0963475
Synthesis of 12-eicosatetraenoic acid derivatives	Up	0.959894	0.89708	1	0.10405
Synthesis of 15-eicosatetraenoic acid derivatives	Up	0.959894	0.89708	1	0.10405
Transcriptional regulation by RUNX2	Down	0.959894	0.89751	27	0.0990846
Termination of translesion DNA synthesis	Up	0.959972	0.898317	2	0.0939454
FOXO-mediated transcription	Up	0.959972	0.899341	7	0.10099
Regulation of PTEN gene transcription	Up	0.959972	0.900509	3	0.129053
Tetrahydrobiopterin (BH4) synthesis, recycling, salvage and regulation	Down	0.959972	0.900861	1	0.0732975
Beta-oxidation of pristanoyl-CoA	Down	0.959972	0.901029	2	0.059594
Negative regulation of the PI3K/AKT network	Down	0.959972	0.902266	8	0.0918932
STAT5 Activation	Down	0.959972	0.90288	3	0.0772371
STAT5 activation downstream of FLT3 ITD mutants	Down	0.959972	0.90288	3	0.0772371
Signaling by FLT3 ITD and TKD mutants	Down	0.959972	0.90288	3	0.0772371
Regulation of RAS by GAPs	Down	0.960004	0.903498	23	0.0936801
Mitochondrial Fatty Acid Beta-Oxidation	Down	0.960925	0.904954	13	0.103769
Pyrimidine salvage	Down	0.962935	0.907923	1	0.0611444
Downregulation of ERBB2 signaling	Down	0.962935	0.908028	4	0.0884979
Regulation of mRNA stability by proteins that bind AU-rich elements	Down	0.963084	0.90876	28	0.0943372
Transcriptional Regulation by MECP2	Up	0.963197	0.909457	2	0.0990594
Cross-presentation of soluble exogenous antigens (endosomes)	Down	0.965988	0.912684	21	0.110523
Chylomicron assembly	Up	0.966192	0.914323	5	0.124694
Transcriptional activation of mitochondrial biogenesis	Down	0.966192	0.914624	8	0.0962892
HDL remodeling	Down	0.966192	0.914654	4	0.106978
Switching of origins to a post-replicative state	Up	0.967214	0.916214	24	0.112664
Dual Incision in GG-NER	Down	0.968002	0.917554	5	0.0678016
ChREBP activates metabolic gene expression	Up	0.970605	0.920617	3	0.136243
Late endosomal microautophagy	Down	0.970729	0.921604	12	0.106991
MET activates PTK2 signaling	Up	0.970729	0.921924	4	0.130368
Beta oxidation of palmitoyl-CoA to myristoyl-CoA	Up	0.974518	0.926618	2	0.115458
Interactions of Rev with host cellular proteins	Up	0.974518	0.926718	8	0.0668961
Vitamins B6 activation to pyridoxal phosphate	Up	0.975099	0.930573	1	0.0923048
Other semaphorin interactions	Down	0.975099	0.931707	1	0.0774861
Fatty acid metabolism	Down	0.975099	0.932002	32	0.106394
RA biosynthesis pathway	Down	0.975099	0.932328	3	0.10098
Inositol phosphate metabolism	Up	0.975099	0.932549	4	0.117523
Mitotic G1 phase and G1/S transition	Up	0.975099	0.933541	25	0.112834
G1/S Transition	Up	0.975099	0.933541	25	0.112834
Unfolded Protein Response (UPR)	Down	0.975099	0.934	12	0.0805345
ABC transporters in lipid homeostasis	Down	0.975099	0.934445	1	0.108855
Scavenging by Class B Receptors	Down	0.975099	0.934445	1	0.108855
Defective ABCA1 causes TGD	Down	0.975099	0.934445	1	0.108855
HDL clearance	Down	0.975099	0.934445	1	0.108855
PI3K/AKT Signaling in Cancer	Up	0.976818	0.936692	5	0.107081
Retrograde transport at the Trans-Golgi-Network	Down	0.977203	0.937961	6	0.0745315
Assembly Of The HIV Virion	Down	0.977203	0.938486	3	0.0706471
Cytosolic iron-sulfur cluster assembly	Down	0.977203	0.938858	1	0.065097
Intracellular signaling by second messengers	Down	0.977928	0.940154	37	0.096869
MAPK3 (ERK1) activation	Down	0.978195	0.941483	2	0.0946847
Diseases associated with glycosylation precursor biosynthesis	Up	0.978195	0.94161	4	0.0745024
TCR signaling	Up	0.981029	0.94494	25	0.102495
Ephrin signaling	Up	0.981809	0.946293	3	0.0998221
Citric acid cycle (TCA cycle)	Down	0.981815	0.947754	11	0.104622
mRNA decay by 3' to 5' exoribonuclease	Up	0.981815	0.951169	2	0.142809
Translesion synthesis by Y family DNA polymerases bypasses lesions on DNA template	Down	0.981815	0.951226	5	0.0826379
Interleukin-1 family signaling	Up	0.981815	0.951331	29	0.100467
MAP3K8 (TPL2)-dependent MAPK1/3 activation	Down	0.981815	0.952042	1	0.105254
RIPK1-mediated regulated necrosis	Down	0.981815	0.952664	3	0.0936093
Regulation of necroptotic cell death	Down	0.981815	0.952664	3	0.0936093
Defective GCLC causes HAGGSD	Down	0.981815	0.953142	1	0.117909
EGR2 and SOX10-mediated initiation of Schwann cell myelination	Up	0.981815	0.954019	2	0.123616
Type I hemidesmosome assembly	Down	0.981815	0.954523	3	0.0949036
FCGR activation	Down	0.981815	0.956086	3	0.137919
Role of phospholipids in phagocytosis	Down	0.981815	0.956086	3	0.137919
Peroxisomal lipid metabolism	Up	0.981815	0.956259	4	0.100482
Insulin receptor recycling	Up	0.981815	0.956879	3	0.0985615
Rev-mediated nuclear export of HIV RNA	Down	0.981815	0.95692	7	0.0495895
Export of Viral Ribonucleoproteins from Nucleus	Down	0.981815	0.95692	7	0.0495895
NEP/NS2 Interacts with the Cellular Export Machinery	Down	0.981815	0.95692	7	0.0495895
Nucleotide biosynthesis	Up	0.981815	0.957134	3	0.0879403
Gamma carboxylation, hypusine formation and arylsulfatase activation	Down	0.982967	0.95886	5	0.109126
TP53 Regulates Metabolic Genes	Up	0.983243	0.959732	25	0.0999489
Degradation of cysteine and homocysteine	Up	0.984353	0.961733	3	0.0946802
Regulation of RUNX1 Expression and Activity	Down	0.984353	0.963823	2	0.0792723
PD-1 signaling	Down	0.984353	0.964786	1	0.0841154
Netrin mediated repulsion signals	Down	0.984353	0.964786	1	0.0841154
Activation of IRF3, IRF7 mediated by TBK1, IKBKE	Down	0.984353	0.964786	1	0.0841154
CREB1 phosphorylation through NMDA receptor-mediated activation of RAS signaling	Up	0.984353	0.965116	2	0.105454
Signaling by Retinoic Acid	Up	0.984353	0.965526	10	0.106007
Fatty acyl-CoA biosynthesis	Up	0.984353	0.965644	5	0.10824
Negative regulation of NMDA receptor-mediated neuronal transmission	Up	0.987878	0.970363	2	0.0858726
HuR (ELAVL1) binds and stabilizes mRNA	Up	0.987878	0.971547	2	0.123674
Interconversion of 2-oxoglutarate and 2-hydroxyglutarate	Down	0.987878	0.973546	3	0.0878044
Repression of WNT target genes	Down	0.987878	0.973668	1	0.0988067
Signaling by TCF7L2 mutants	Down	0.987878	0.973668	1	0.0988067
Transcriptional activity of SMAD2/SMAD3:SMAD4 heterotrimer	Down	0.987878	0.974366	4	0.103588
Downregulation of SMAD2/3:SMAD4 transcriptional activity	Down	0.987878	0.974366	4	0.103588
Orc1 removal from chromatin	Down	0.987878	0.974537	23	0.106833
Calcineurin activates NFAT	Down	0.987878	0.974553	3	0.0622411
Interferon gamma signaling	Up	0.98894	0.976207	4	0.11623
Circadian Clock	Up	0.989076	0.977075	3	0.112706
Sulfide oxidation to sulfate	Up	0.989076	0.977554	1	0.0876995
Signaling by CSF1 (M-CSF) in myeloid cells	Up	0.98927	0.979133	5	0.118555
MAPK6/MAPK4 signaling	Down	0.98927	0.979525	26	0.101972
Chylomicron remodeling	Down	0.98927	0.980234	4	0.116629
M Phase	Up	0.98927	0.98158	70	0.0985
Post-transcriptional silencing by small RNAs	Down	0.98927	0.983811	1	0.0744292
Regulation of PTEN mRNA translation	Down	0.98927	0.983811	1	0.0744292
Competing endogenous RNAs (ceRNAs) regulate PTEN translation	Down	0.98927	0.983811	1	0.0744292
Regulation of MECP2 expression and activity	Down	0.98927	0.983811	1	0.0744292
Regulation of NPAS4 gene expression	Down	0.98927	0.983811	1	0.0744292
Regulation of NPAS4 mRNA translation	Down	0.98927	0.983811	1	0.0744292
ISG15 antiviral mechanism	Up	0.990768	0.985908	15	0.079803
Synthesis of PE	Up	0.991905	0.987723	2	0.0905991
The role of GTSE1 in G2/M progression after G2 checkpoint	Down	0.991905	0.989432	24	0.111602
Processing of Capped Intronless Pre-mRNA	Down	0.991905	0.989442	4	0.0918013
FOXO-mediated transcription of oxidative stress, metabolic and neuronal genes	Down	0.991905	0.989473	2	0.100079
Glycogen synthesis	Down	0.992219	0.990394	5	0.0952934
Transport of fatty acids	Up	0.993446	0.992228	1	0.104777
AMPK inhibits chREBP transcriptional activation activity	Down	0.998429	0.997817	1	0.0944592
Translesion Synthesis by POLH	Down	0.999313	0.999313	4	0.0893922

## Sheet: PROTEOMICS_INT_1_fold_cha...
Identifier	logFC	AveExpr	t	P.Value	adj.P.Val	B
P05106	0.837706	0.0499562	3.31683	0.00395455	0.944415	-4.09963
Q07812	0.73871	-0.101107	3.28069	0.00427925	0.944415	-4.10768
P51911	1.91358	-0.476677	3.26399	0.00443799	0.944415	-4.11141
P43121	0.901853	-0.103488	3.22002	0.00488413	0.944415	-4.12127
Q8IWE2	0.779146	-0.0930403	3.17449	0.00539256	0.944415	-4.13155
P02675	1.10506	-0.0862367	3.10476	0.00627327	0.944415	-4.14739
P21333	1.18777	-0.090599	3.07773	0.00665119	0.944415	-4.15357
Q15746	1.13948	-0.17141	3.05501	0.00698598	0.944415	-4.15878
O15511	0.798533	0.0397614	3.05176	0.0070351	0.944415	-4.15952
P62917	-1.13774	-0.050122	-2.92527	0.00923583	0.944415	-4.18872
P42766	-0.730922	-0.0861906	-2.83335	0.0112401	0.944415	-4.21013
P21980	0.665258	0.257621	2.79919	0.0120869	0.944415	-4.21813
P06703	0.746054	0.190389	2.73135	0.0139543	0.944415	-4.23404
P02671	0.959822	-0.0608409	2.70531	0.0147424	0.944415	-4.24017
Q15113	0.700331	0.418498	2.64587	0.0167032	0.944415	-4.25418
Q9Y3P9	0.872791	-0.180755	2.64442	0.0167539	0.944415	-4.25452
P62424	-1.16905	0.0250745	-2.63409	0.0171203	0.944415	-4.25695
O75190	0.579185	-0.0217138	2.62162	0.0175726	0.944415	-4.2599
Q9Y3U8	-1.23849	0.0453598	-2.61878	0.0176771	0.944415	-4.26057
Q9UBG0	0.860495	0.493989	2.55604	0.0201448	0.944415	-4.27538
Q969G5	0.768806	-0.0166197	2.51915	0.0217449	0.944415	-4.2841
P29401	0.555727	0.0601247	2.51529	0.0219188	0.944415	-4.28501
Q53TN4	0.741112	0.119787	2.50746	0.0222762	0.944415	-4.28686
P14543	0.669332	-0.0770042	2.50313	0.0224761	0.944415	-4.28788
Q07960	0.817924	-0.0392072	2.4941	0.0228985	0.944415	-4.29001
P37802	0.647918	-0.0480786	2.48307	0.0234249	0.944415	-4.29262
P21397	0.577631	-0.0226769	2.46992	0.0240672	0.944415	-4.29573
P61927	-0.594007	-0.0179145	-2.46415	0.0243546	0.944415	-4.29709
Q9H4A5	0.465624	-0.100249	2.43776	0.0257087	0.944415	-4.30332
P61224	0.649548	0.0593562	2.36622	0.0297448	0.944415	-4.3202
P13533	-0.979491	-0.0144684	-2.33064	0.0319654	0.944415	-4.32857
P62906	-1.17211	0.0771658	-2.32284	0.0324728	0.944415	-4.33041
P04899	0.592762	0.0768178	2.29507	0.0343395	0.944415	-4.33693
Q9Y639	0.609909	0.00668658	2.29095	0.0346247	0.944415	-4.3379
P04083	0.709078	0.236782	2.23725	0.0385492	0.944415	-4.35048
P50914	-0.600784	-0.0675798	-2.23717	0.0385555	0.944415	-4.3505
P04839	0.646264	-0.061346	2.23272	0.038899	0.944415	-4.35154
P60033	0.756791	0.181461	2.21922	0.0399573	0.944415	-4.3547
P26447	0.581088	0.0833869	2.21188	0.0405437	0.944415	-4.35641
P07355	0.674456	0.206902	2.15184	0.045646	0.944415	-4.37039
P07585	0.58649	0.0520573	2.14751	0.0460356	0.944415	-4.37139
P28289	-0.61392	-0.125758	-2.14504	0.0462598	0.944415	-4.37197
O43491	0.508827	0.0588729	2.13637	0.047053	0.944415	-4.37398
O75569	-0.907811	0.0342219	-2.1297	0.0476713	0.944415	-4.37552
Q9UMS6	-0.442225	-0.06662	-2.12826	0.0478061	0.944415	-4.37586
Q00688	-0.387215	-0.12242	-2.12671	0.0479513	0.944415	-4.37622
Q05682	0.67678	-0.155811	2.1234	0.0482625	0.944415	-4.37698
P67936	0.583466	0.0681515	2.12164	0.0484287	0.944415	-4.37739
Q16222	0.563035	0.116071	2.11889	0.0486898	0.944415	-4.37803
P29966	0.541047	0.226559	2.09749	0.0507651	0.944415	-4.38297
Q9NVD7	0.550205	0.0254968	2.09066	0.0514441	0.944415	-4.38455
Q16658	0.550974	0.188227	2.08619	0.051893	0.944415	-4.38558
P11055	-1.03622	0.209061	-2.08009	0.052511	0.944415	-4.38698
P51884	0.637032	0.167917	2.07141	0.0534026	0.944415	-4.38898
Q02413	0.597452	0.137021	2.05981	0.054615	0.944415	-4.39165
P06727	0.492867	0.105669	2.03788	0.056976	0.944415	-4.39668
P51888	0.600529	0.0180228	2.02656	0.0582309	0.944415	-4.39927
Q52LJ0	-0.464342	0.167358	-2.0253	0.0583713	0.944415	-4.39955
P14649	-0.733087	-0.16278	-2.02351	0.0585733	0.944415	-4.39996
Q15286	0.436888	0.0952054	2.01633	0.059386	0.944415	-4.4016
P49454	1.09946	-0.224084	1.99571	0.0617771	0.944415	-4.40631
P60981	0.716627	0.0091205	1.95183	0.0671553	0.944415	-4.41626
Q8NFW8	-0.414629	-0.0240854	-1.9518	0.067159	0.944415	-4.41626
Q9UBI6	0.606434	0.115319	1.94671	0.0678091	0.944415	-4.41741
P08697	0.534999	0.0846488	1.94099	0.0685468	0.944415	-4.4187
P10253	0.501593	-0.173488	1.94035	0.0686305	0.944415	-4.41885
P10916	-0.615266	-0.0648541	-1.93696	0.0690712	0.944415	-4.41961
P61254	-0.456033	-0.0807326	-1.93046	0.069923	0.944415	-4.42108
P04275	0.467172	0.0136569	1.92675	0.0704136	0.944415	-4.42191
P53582	-0.542985	0.187752	-1.92349	0.0708475	0.944415	-4.42265
P49207	-0.499417	-0.0110851	-1.91492	0.0720005	0.944415	-4.42457
P17858	0.56733	0.107136	1.90862	0.0728567	0.944415	-4.42598
P02070	0.598427	0.0165548	1.90844	0.0728814	0.944415	-4.42603
Q9HD33	0.45723	-0.291962	1.89746	0.0743982	0.944415	-4.42849
P30050	-0.696597	0.00929365	-1.89219	0.0751357	0.944415	-4.42966
O95816	0.335028	-0.115074	1.88933	0.075539	0.944415	-4.4303
P18077	-0.588239	0.0109125	-1.88839	0.0756715	0.944415	-4.43051
Q9Y6H1	-0.43589	0.0562963	-1.8817	0.0766237	0.944415	-4.43201
P49458	-0.41713	-0.086339	-1.88169	0.0766246	0.944415	-4.43201
P00338	0.44796	0.241173	1.87346	0.077811	0.944415	-4.43384
P02768	0.454262	0.31275	1.87203	0.0780175	0.944415	-4.43416
P05452	0.532489	0.294573	1.86842	0.0785447	0.944415	-4.43497
P35443	0.769018	0.233095	1.84035	0.0827458	0.944415	-4.44119
P56192	0.410534	-0.168172	1.83289	0.083894	0.944415	-4.44284
Q04941	0.451078	0.16737	1.8281	0.0846392	0.944415	-4.4439
Q9HA65	0.610277	0.281958	1.82642	0.0849027	0.944415	-4.44427
P05109	0.686624	-0.0301901	1.82035	0.0858576	0.944415	-4.44561
Q9H773	-0.325785	-0.108247	-1.81644	0.0864789	0.944415	-4.44647
P48739	0.363448	-0.0140101	1.78661	0.0913426	0.944415	-4.45301
Q0VDF9	0.442618	-0.0435751	1.78071	0.0923315	0.944415	-4.4543
P57077	-0.488619	0.0329528	-1.77798	0.0927935	0.944415	-4.45489
Q8N183	0.326991	0.0394485	1.77535	0.0932401	0.944415	-4.45547
P18085	0.592169	-0.00438811	1.77026	0.0941081	0.944415	-4.45658
Q96SW2	0.393684	0.0807732	1.76924	0.0942831	0.944415	-4.4568
Q02952	0.544616	0.0488096	1.76628	0.0947923	0.944415	-4.45744
Q9BQB6	0.470417	0.1945	1.764	0.0951872	0.944415	-4.45794
Q9UJY1	-0.311786	-0.107148	-1.75971	0.0959321	0.944415	-4.45887
Q92522	-0.569908	-0.218199	-1.75537	0.0966905	0.944415	-4.45981
P18124	-0.559417	0.039028	-1.74881	0.0978468	0.944415	-4.46123
Q9NZQ9	-0.625097	0.0139278	-1.74347	0.0987979	0.944415	-4.46239
P17096	-0.486024	-0.057371	-1.7432	0.0988464	0.944415	-4.46245
O15144	0.439311	0.0847733	1.74106	0.0992307	0.944415	-4.46291
O95793	-0.432644	-0.155036	-1.73913	0.0995762	0.944415	-4.46332
Q9BXP5	0.33667	0.0363325	1.73833	0.0997208	0.944415	-4.4635
Q13508	0.324525	-0.0722957	1.73384	0.100534	0.944415	-4.46447
P43304	0.366736	0.0728524	1.72603	0.10196	0.944415	-4.46615
Q9H270	0.459086	0.176874	1.72551	0.102055	0.944415	-4.46626
P10599	-0.418565	-0.0235501	-1.72312	0.102496	0.944415	-4.46678
Q9UNH7	0.441635	0.126906	1.7126	0.104452	0.944415	-4.46903
Q96DG6	0.351075	0.0453756	1.70697	0.105514	0.944415	-4.47024
Q01814	0.427721	0.0920044	1.70607	0.105685	0.944415	-4.47044
P05023	0.381375	0.0392718	1.70116	0.106618	0.944415	-4.47148
Q92614	-0.419073	0.0695669	-1.69563	0.107679	0.944415	-4.47267
Q8IVH4	0.434039	-0.0631986	1.68943	0.108878	0.944415	-4.47399
Q13217	0.361473	-0.0134437	1.6863	0.109489	0.944415	-4.47466
Q16853	0.468561	-0.203464	1.68543	0.10966	0.944415	-4.47484
P02794	0.350046	0.0124478	1.6762	0.111478	0.944415	-4.4768
Q6PCE3	0.348219	-0.0334016	1.66975	0.112764	0.944415	-4.47817
P11216	0.41937	0.0949163	1.65885	0.114966	0.944415	-4.48048
Q9Y490	0.384576	0.0581379	1.64839	0.117114	0.944415	-4.48268
P05546	0.492995	0.173944	1.64565	0.117682	0.944415	-4.48326
Q13409	0.385898	0.101909	1.64125	0.1186	0.944415	-4.48418
P36955	0.439842	0.16844	1.6334	0.120251	0.944415	-4.48583
Q9UN36	0.351464	0.14278	1.62906	0.121173	0.944415	-4.48674
P68133	-0.591182	0.13843	-1.62538	0.12196	0.944415	-4.48751
Q86VP6	0.387496	0.0666332	1.62341	0.122382	0.944415	-4.48792
P08758	0.3599	-0.00132558	1.61975	0.123172	0.944415	-4.48869
P09496	0.308801	-0.0377577	1.61682	0.123807	0.944415	-4.4893
P27348	0.362436	0.0210631	1.60656	0.126049	0.944415	-4.49143
P61204	0.515407	0.125529	1.60185	0.127091	0.944415	-4.49241
P02655	-0.379994	0.101466	-1.59726	0.128111	0.944415	-4.49336
P30085	0.401781	-0.00963798	1.58505	0.130864	0.944415	-4.49588
Q9BX67	-0.82354	0.020069	-1.57785	0.132509	0.944415	-4.49737
Q99808	0.336594	-0.00943838	1.57318	0.133587	0.944415	-4.49833
O15400	0.340862	-0.0374387	1.57238	0.133773	0.944415	-4.49849
P05141	0.390148	0.0777224	1.57174	0.13392	0.944415	-4.49862
P62750	-0.298374	-0.12685	-1.56652	0.135136	0.944415	-4.4997
Q96CV8	0.321777	0.0186008	1.55926	0.136842	0.944415	-4.50118
P62899	-0.521999	0.0154656	-1.54998	0.139046	0.944415	-4.50308
P51149	0.395966	0.0593656	1.54904	0.139272	0.944415	-4.50327
Q9UBV2	0.357806	0.0219189	1.54723	0.139706	0.944415	-4.50364
P61326	0.375023	0.0080266	1.54622	0.13995	0.944415	-4.50384
P10301	0.378799	-0.061901	1.5433	0.140655	0.944415	-4.50444
P26038	0.417253	0.184985	1.54107	0.141193	0.944415	-4.50489
Q9Y2H0	0.31817	-0.113526	1.53958	0.141554	0.944415	-4.50519
Q9BZI7	-0.54047	0.0239922	-1.53888	0.141725	0.944415	-4.50534
Q96PD5	0.374785	0.0837805	1.53852	0.141813	0.944415	-4.50541
P11182	-0.396923	-0.0693612	-1.53733	0.142103	0.944415	-4.50565
Q53H12	0.388953	-0.0871099	1.53422	0.142861	0.944415	-4.50628
Q96T51	0.346561	0.103233	1.53273	0.143227	0.944415	-4.50658
Q9H9Q4	-0.4519	0.00981755	-1.52202	0.145876	0.944415	-4.50875
P02750	0.448366	-0.165758	1.51713	0.147097	0.944415	-4.50973
P52597	0.275195	-0.0632038	1.51433	0.147799	0.944415	-4.5103
P63316	-0.39996	0.0992577	-1.51268	0.148216	0.944415	-4.51063
P05388	-0.464232	0.0561995	-1.51205	0.148375	0.944415	-4.51075
P62879	0.350299	0.0559406	1.49928	0.151631	0.944415	-4.51332
P80723	0.625291	0.247486	1.49601	0.152473	0.944415	-4.51397
Q14116	0.290376	-0.0271056	1.48526	0.155272	0.944415	-4.51611
Q15404	0.3758	0.00430594	1.4849	0.155367	0.944415	-4.51618
Q9NQX3	0.296541	-0.00825799	1.48346	0.155744	0.944415	-4.51647
Q969X5	0.422549	0.110917	1.48272	0.155939	0.944415	-4.51662
Q9GZZ9	0.290697	0.0113161	1.47612	0.157686	0.944415	-4.51793
P16403	-0.466382	-0.258795	-1.476	0.157717	0.944415	-4.51795
P30740	0.435254	0.221764	1.47535	0.157889	0.944415	-4.51808
P04406	0.332016	0.129658	1.47364	0.158344	0.944415	-4.51842
Q96QK1	0.358753	-0.0155496	1.47352	0.158376	0.944415	-4.51844
Q04759	0.326026	-0.0516736	1.46626	0.160323	0.944415	-4.51988
Q14112	0.402591	0.135272	1.46586	0.160431	0.944415	-4.51996
O75131	0.281082	0.126307	1.45633	0.163015	0.944415	-4.52184
Q08380	0.39514	0.408522	1.45473	0.163453	0.944415	-4.52215
Q9GZV1	-0.396155	-0.153269	-1.45275	0.163996	0.944415	-4.52254
Q9HAU5	-0.350145	0.0624123	-1.45271	0.164007	0.944415	-4.52255
P02743	0.572894	-0.0168151	1.45166	0.164294	0.944415	-4.52275
P11217	0.32479	0.040536	1.44807	0.165282	0.944415	-4.52346
Q00839	0.262809	-0.0200153	1.44793	0.165322	0.944415	-4.52348
P04003	-0.630369	0.157609	-1.4461	0.165826	0.944415	-4.52384
Q9BZQ8	0.380344	0.112701	1.4441	0.166383	0.944415	-4.52423
P04921	0.427802	-0.0184393	1.43988	0.167557	0.944415	-4.52506
P37837	0.311584	0.022055	1.43926	0.167731	0.944415	-4.52518
Q15019	0.378151	0.052983	1.4385	0.167943	0.944415	-4.52533
Q9C0C9	0.375454	-0.0100113	1.43797	0.168091	0.944415	-4.52543
O15145	0.501777	0.111627	1.43486	0.168963	0.944415	-4.52604
Q9Y333	0.391237	-0.0956494	1.43286	0.169527	0.944415	-4.52643
Q13131	0.354279	0.0966585	1.43003	0.170326	0.944415	-4.52698
P04350	0.412178	0.137901	1.42847	0.170768	0.944415	-4.52728
P36578	-0.283754	-0.0346319	-1.42831	0.170814	0.944415	-4.52731
Q9NQC3	0.33547	0.106035	1.42715	0.171142	0.944415	-4.52754
Q9NVE7	0.29993	0.0261011	1.4226	0.172438	0.944415	-4.52842
P07384	0.327188	0.0593104	1.41608	0.17431	0.944415	-4.52968
Q15785	0.264827	0.0139909	1.4143	0.174825	0.944415	-4.53003
O00487	0.306783	-0.0344147	1.41388	0.174946	0.944415	-4.53011
Q9NQP4	-0.418576	0.021761	-1.41308	0.175178	0.944415	-4.53026
P04844	0.331807	0.0280914	1.4112	0.175724	0.944415	-4.53063
Q9UH65	0.427194	0.145335	1.40598	0.177242	0.944415	-4.53163
Q9NQ50	-0.342757	0.0799987	-1.40584	0.177285	0.944415	-4.53166
O75626	0.369469	-0.0077631	1.39833	0.179489	0.944415	-4.5331
Q9BZL4	-0.626189	-0.0573005	-1.3972	0.179823	0.944415	-4.53332
Q96C01	-0.243679	-0.00162783	-1.39473	0.180557	0.944415	-4.53379
Q96AN5	0.374429	-0.12136	1.39382	0.180826	0.944415	-4.53397
Q13322	0.42217	0.058725	1.39287	0.18111	0.944415	-4.53415
O75369	0.313753	0.0199226	1.39227	0.181288	0.944415	-4.53426
P41091	-0.356397	0.017941	-1.39085	0.181711	0.944415	-4.53453
Q9Y235	-0.351106	-0.0114172	-1.3893	0.182172	0.944415	-4.53483
P51572	0.322293	0.0798177	1.38556	0.183294	0.944415	-4.53554
O00418	0.298525	0.0794954	1.38153	0.184506	0.944415	-4.53631
P55263	0.316904	0.129569	1.37628	0.186099	0.944415	-4.53731
P30711	0.346836	0.123517	1.37267	0.187198	0.944415	-4.538
Q9NZ32	0.286793	0.0308104	1.36918	0.188267	0.944415	-4.53866
P22352	0.349583	-0.18018	1.36855	0.188458	0.944415	-4.53878
P36507	0.340883	0.00750495	1.36351	0.190014	0.944415	-4.53973
Q86UY0	0.269219	-0.0153681	1.36337	0.190055	0.944415	-4.53975
P60903	0.433168	0.043139	1.36185	0.190525	0.944415	-4.54004
P49069	0.330595	0.0430591	1.36122	0.190721	0.944415	-4.54016
P23109	0.277902	-0.058732	1.3594	0.191288	0.944415	-4.5405
P07305	-0.370336	-0.274167	-1.35925	0.191334	0.944415	-4.54053
Q6P1L8	0.306587	-0.0474273	1.35721	0.191969	0.944415	-4.54092
Q9NRV9	0.285306	0.097097	1.35596	0.192357	0.944415	-4.54115
P04632	0.257259	-0.0361615	1.35484	0.192709	0.944415	-4.54136
Q9Y5S9	-0.257993	-0.056804	-1.35306	0.193266	0.944415	-4.5417
Q02790	0.345655	0.0493922	1.34779	0.194922	0.944415	-4.54268
Q15276	0.250611	-0.0310914	1.33617	0.198617	0.944415	-4.54486
Q14161	0.334156	0.000271413	1.33131	0.200178	0.944415	-4.54576
O14983	0.278554	0.0906145	1.33045	0.200454	0.944415	-4.54592
P47756	-0.23831	0.0505565	-1.32569	0.201993	0.944415	-4.5468
Q14165	0.344686	0.0725619	1.32159	0.203328	0.944415	-4.54756
Q13057	0.294784	0.0237962	1.31735	0.204717	0.944415	-4.54835
P54284	0.277949	-0.0527605	1.31723	0.204755	0.944415	-4.54837
O00233	-0.248671	-0.110832	-1.31216	0.206423	0.944415	-4.5493
Q8N142	0.325339	0.101351	1.31014	0.207092	0.944415	-4.54967
Q6P3W7	0.328753	0.0299094	1.30936	0.207351	0.944415	-4.54982
Q9UBB4	0.304547	0.112829	1.30899	0.207474	0.944415	-4.54989
P08579	-0.241969	-0.115183	-1.30238	0.209673	0.944415	-4.5511
P07738	0.385872	0.128029	1.30167	0.209909	0.944415	-4.55123
Q9H0M0	-0.296341	0.0750089	-1.29948	0.210643	0.944415	-4.55163
P21695	0.278468	0.140949	1.28918	0.214122	0.944415	-4.55351
Q8N5X7	0.26904	-0.019046	1.28846	0.214365	0.944415	-4.55364
Q8NC56	-0.408547	0.00647542	-1.28723	0.214785	0.944415	-4.55386
P02790	0.382542	0.278862	1.28104	0.2169	0.944415	-4.55498
Q9BUF5	0.44939	0.293157	1.27979	0.217332	0.944415	-4.55521
Q9H467	0.254892	-0.273095	1.27619	0.218571	0.944415	-4.55586
Q9NR45	0.361443	-0.0138831	1.27587	0.218682	0.944415	-4.55592
Q9UPN7	0.287875	-0.134846	1.27202	0.220017	0.944415	-4.55661
Q14C86	0.25118	0.0283359	1.27021	0.220644	0.944415	-4.55694
O00743	0.327354	-0.10337	1.26433	0.222696	0.944415	-4.558
Q10589	0.244648	-0.00989942	1.26346	0.223002	0.944415	-4.55815
Q96IV0	0.251573	0.0232325	1.25908	0.224544	0.944415	-4.55894
Q93009	0.254561	-0.00474006	1.25623	0.225549	0.944415	-4.55945
O94829	0.377025	-0.382162	1.25414	0.226292	0.944415	-4.55982
O43715	0.332557	-0.111296	1.25155	0.227209	0.944415	-4.56028
Q7L523	0.329267	0.00615639	1.25027	0.227667	0.944415	-4.56051
Q9UHG3	0.306394	0.102081	1.24926	0.228026	0.944415	-4.56069
P31946	0.247449	0.00689479	1.24711	0.228795	0.944415	-4.56107
Q96CW1	0.288136	0.080993	1.24638	0.229059	0.944415	-4.5612
Q969H8	0.254641	0.051621	1.2462	0.229123	0.944415	-4.56124
Q9H1R3	0.312398	0.0944631	1.24568	0.229308	0.944415	-4.56133
Q5VVQ6	0.327467	-0.200069	1.24323	0.230189	0.944415	-4.56176
Q8TB45	0.293704	0.0229781	1.24227	0.230532	0.944415	-4.56193
P09525	0.306692	0.082109	1.2415	0.23081	0.944415	-4.56207
O43374	0.298635	0.0991532	1.24059	0.231138	0.944415	-4.56223
P23142	0.292672	0.0994957	1.23986	0.2314	0.944415	-4.56236
Q13838	0.262302	0.108255	1.23557	0.232953	0.944415	-4.56312
Q02543	-0.286313	0.00805897	-1.23541	0.233011	0.944415	-4.56315
P60953	0.360194	0.0819136	1.23427	0.233425	0.944415	-4.56335
P00734	0.354256	0.151315	1.23236	0.234121	0.944415	-4.56368
P62877	0.235443	0.0146358	1.23127	0.234517	0.944415	-4.56388
Q96JJ7	0.314328	0.229707	1.23074	0.234712	0.944415	-4.56397
P50990	0.301554	0.0429223	1.23041	0.234831	0.944415	-4.56403
P39019	-0.213235	-0.0449635	-1.22529	0.236709	0.944415	-4.56493
P51692	0.252062	-0.0324303	1.22286	0.237602	0.944415	-4.56536
Q5J8M3	0.330657	-0.169158	1.22147	0.238114	0.944415	-4.5656
Q6P1N0	-0.211129	0.0728254	-1.21719	0.239696	0.944415	-4.56635
Q9BXS1	-0.296011	-0.346512	-1.21667	0.23989	0.944415	-4.56644
P22792	0.298451	0.0631244	1.21195	0.241646	0.944415	-4.56726
Q14061	-0.283263	-0.111386	-1.21053	0.242177	0.944415	-4.56751
Q9UPU5	0.221967	-0.117264	1.20863	0.24289	0.944415	-4.56784
P00367	0.304503	0.0466775	1.20698	0.243506	0.944415	-4.56813
P33947	0.328567	0.269384	1.20611	0.243832	0.944415	-4.56828
Q5T4S7	0.275888	-0.038402	1.20592	0.243907	0.944415	-4.56831
P50225	0.49474	-0.0168054	1.20412	0.244583	0.944415	-4.56862
P06744	0.274208	0.0815276	1.20145	0.24559	0.944415	-4.56909
Q9HBI1	0.248539	-0.0288387	1.20132	0.245638	0.944415	-4.56911
Q08722	0.257296	0.0772937	1.20015	0.246083	0.944415	-4.56931
P47813	-0.357892	-0.112686	-1.19916	0.246458	0.944415	-4.56948
Q9UKX2	-0.656046	-0.0979883	-1.19897	0.246528	0.944415	-4.56952
Q15847	0.515245	-0.21381	1.19869	0.246635	0.944415	-4.56956
O75874	0.302797	0.0225271	1.19849	0.246709	0.944415	-4.5696
O75643	0.233928	-0.073828	1.19729	0.247165	0.944415	-4.56981
Q9NZN4	0.295169	0.025651	1.1972	0.247201	0.944415	-4.56982
Q5VU92	-0.385482	-0.121984	-1.19621	0.247576	0.944415	-4.56999
Q9BTE1	0.353905	0.148401	1.18931	0.250211	0.944415	-4.57118
Q92621	-0.609922	0.432706	-1.18887	0.250379	0.944415	-4.57126
P49840	0.246794	0.0354603	1.18658	0.25126	0.944415	-4.57165
Q9NZA1	0.264226	-0.00180884	1.18546	0.251689	0.944415	-4.57184
Q9Y678	0.305666	0.071311	1.18408	0.252219	0.944415	-4.57208
O43929	0.296418	0.0398446	1.18177	0.253111	0.944415	-4.57247
P20340	0.298914	0.0993737	1.18161	0.253173	0.944415	-4.5725
P09871	0.371092	0.31718	1.18004	0.253781	0.944415	-4.57277
Q8IZ83	0.24079	-0.250096	1.17428	0.256021	0.944415	-4.57375
O60240	0.40425	-0.210416	1.17386	0.256186	0.944415	-4.57382
P08237	0.248017	0.105107	1.17368	0.256254	0.944415	-4.57385
Q15084	0.243784	0.0977605	1.17117	0.257236	0.944415	-4.57428
P55290	0.244363	0.0042084	1.16899	0.258091	0.944415	-4.57465
Q9Y2Z4	0.238644	0.075844	1.16895	0.258108	0.944415	-4.57466
P01008	0.298764	0.190885	1.16869	0.258209	0.944415	-4.5747
Q9UJA3	0.464811	-0.130392	1.16798	0.258487	0.944415	-4.57482
Q13884	0.232552	-0.059566	1.16575	0.259364	0.944415	-4.5752
Q96AC1	0.321637	0.0252108	1.16513	0.259608	0.944415	-4.57531
Q9BZL1	0.254831	0.0194741	1.1645	0.259857	0.944415	-4.57541
P52788	0.252142	0.000782893	1.16365	0.260191	0.944415	-4.57556
Q8N2U9	0.256772	0.0533429	1.16203	0.260832	0.944415	-4.57583
Q7RTV0	-0.244425	-0.082205	-1.15892	0.262066	0.944415	-4.57636
Q99832	0.280288	-0.00823398	1.1588	0.262112	0.944415	-4.57638
P62826	0.262608	0.096913	1.15698	0.262834	0.944415	-4.57668
Q00169	0.269801	0.0930553	1.15517	0.263554	0.944415	-4.57699
P13010	-0.385691	0.0927864	-1.15431	0.263899	0.944415	-4.57713
P22234	0.227974	0.0189965	1.14983	0.265691	0.944415	-4.57789
Q15008	0.27617	-0.0213451	1.14627	0.267123	0.944415	-4.57848
Q969M7	-0.229964	0.044516	-1.14519	0.267556	0.944415	-4.57866
A1L4K1	0.201375	-0.143297	1.14495	0.267653	0.944415	-4.5787
Q9Y3B4	0.253478	-0.132153	1.14311	0.268397	0.944415	-4.57901
P17568	0.211174	-0.0873471	1.14109	0.269212	0.944415	-4.57935
Q9UKG1	0.257761	-0.0607143	1.14074	0.269355	0.944415	-4.57941
Q15555	0.267069	0.110629	1.1398	0.269736	0.944415	-4.57956
O60664	0.233297	0.0857054	1.13708	0.270841	0.944415	-4.58001
Q9GZS3	0.331797	0.0822109	1.13675	0.270974	0.944415	-4.58007
P47755	-0.21283	0.0641696	-1.13664	0.271019	0.944415	-4.58009
Q9NQ92	-0.226842	-0.182106	-1.13396	0.272114	0.944415	-4.58053
P48059	0.247562	0.0704949	1.13304	0.272488	0.944415	-4.58069
Q9ULT8	0.260844	-0.00434693	1.13269	0.27263	0.944415	-4.58074
P31751	0.28506	0.255939	1.13235	0.272768	0.944415	-4.5808
P14735	0.230716	-0.0821736	1.13177	0.273007	0.944415	-4.5809
P12882	-0.668143	0.129217	-1.13111	0.273277	0.944415	-4.58101
P46109	0.245054	0.0859246	1.12882	0.274214	0.944415	-4.58138
P09874	-0.280877	0.0417235	-1.12831	0.274424	0.944415	-4.58147
P11234	0.272353	-0.0731436	1.12729	0.274844	0.944415	-4.58164
P78356	0.240498	-0.0575212	1.1247	0.275911	0.944415	-4.58206
P37108	-0.244105	-0.116394	-1.12406	0.276175	0.944415	-4.58217
Q9Y3D3	-0.264857	0.104595	-1.12382	0.276275	0.944415	-4.58221
Q6S8J3	0.407802	0.119474	1.12165	0.277173	0.944415	-4.58257
Q4G0N4	0.275668	-0.0306913	1.12	0.277857	0.944415	-4.58284
O95613	0.278302	-0.127499	1.11936	0.278123	0.944415	-4.58295
P05026	0.257865	0.0155778	1.11928	0.278154	0.944415	-4.58296
P52209	0.287128	0.0853445	1.11311	0.280722	0.944415	-4.58397
Q9NRY5	0.223542	0.0339098	1.10891	0.28248	0.944415	-4.58466
Q15907	0.274528	0.123035	1.10591	0.283744	0.944415	-4.58515
P04733	-0.2491	-0.174442	-1.1056	0.283873	0.944415	-4.5852
P24593	0.299573	-0.154636	1.10252	0.285172	0.944415	-4.5857
Q02127	-0.289493	-0.117054	-1.10164	0.285545	0.944415	-4.58584
Q8TD55	0.292108	0.169378	1.09694	0.287538	0.944415	-4.5866
P61020	0.242192	0.0495112	1.09649	0.287731	0.944415	-4.58668
P61106	0.256577	-0.074422	1.09641	0.287765	0.944415	-4.58669
O15294	0.265342	-0.0369494	1.09377	0.288889	0.944415	-4.58711
Q9NS86	0.246804	0.0159476	1.09175	0.289752	0.944415	-4.58744
O43660	0.346399	-0.214754	1.09097	0.290086	0.944415	-4.58757
Q00872	-0.540008	-0.123263	-1.09007	0.290469	0.944415	-4.58771
Q9NW15	0.262481	0.190322	1.08958	0.290682	0.944415	-4.58779
Q86WU2	-0.239324	-0.0109775	-1.0888	0.291016	0.944415	-4.58792
Q9H3N1	0.418422	0.167446	1.08872	0.291047	0.944415	-4.58793
Q13228	0.238875	-0.0735524	1.08597	0.292228	0.944415	-4.58837
Q96GG9	0.22516	-0.0971489	1.08352	0.293286	0.944415	-4.58876
A5YM72	0.318898	0.372692	1.08342	0.293331	0.944415	-4.58878
P45381	0.25744	0.0169572	1.08049	0.294595	0.944415	-4.58925
Q9NRN7	0.270031	0.0314066	1.08045	0.294612	0.944415	-4.58926
Q9BQ69	0.194985	-0.0369801	1.08012	0.294755	0.944415	-4.58931
O76003	0.259242	0.0305108	1.07916	0.29517	0.944415	-4.58946
Q9UH90	-0.205492	-0.0893704	-1.07894	0.295267	0.944415	-4.5895
Q9NVH1	0.22246	-0.00464494	1.07612	0.29649	0.944415	-4.58995
P61026	0.254102	0.0241304	1.07278	0.297945	0.944415	-4.59048
O75886	0.235302	0.00339107	1.07118	0.298643	0.944415	-4.59073
O75608	0.262742	-0.0254843	1.07051	0.298939	0.944415	-4.59084
O14979	-0.224047	-0.137934	-1.069	0.2996	0.944415	-4.59108
O94919	0.219404	-0.127538	1.06519	0.30127	0.944415	-4.59168
P49137	0.238231	0.0398353	1.06487	0.301414	0.944415	-4.59174
Q9Y4E8	0.208982	0.0371958	1.0632	0.302148	0.944415	-4.592
Q9NR12	0.326737	0.0248965	1.06277	0.302337	0.944415	-4.59207
Q13177	0.24347	0.00126509	1.06275	0.302348	0.944415	-4.59207
P39023	-0.25415	0.0783378	-1.0607	0.303252	0.944415	-4.59239
Q09666	0.245646	0.0365974	1.06059	0.303298	0.944415	-4.59241
P51668	0.246781	-0.10552	1.06023	0.303461	0.944415	-4.59247
Q96IY4	0.30786	0.0946264	1.06018	0.30348	0.944415	-4.59248
P15121	0.232756	0.0234679	1.05971	0.30369	0.944415	-4.59255
P17812	0.193159	-0.10059	1.05863	0.304168	0.944415	-4.59272
Q9H0U4	0.249316	0.0844641	1.05744	0.304696	0.944415	-4.59291
O43684	0.239952	-0.090087	1.05459	0.305963	0.944415	-4.59336
Q8IWB9	0.187805	-0.0450813	1.05408	0.306186	0.944415	-4.59344
Q7Z7M9	0.397605	0.304778	1.04603	0.309788	0.944415	-4.5947
Q6NZI2	0.186169	-0.0303827	1.04575	0.309911	0.944415	-4.59474
Q9UPR0	0.297454	0.0333911	1.04479	0.310342	0.944415	-4.59489
P11441	-0.17851	-0.060004	-1.0433	0.311014	0.944415	-4.59512
P51812	0.278175	0.0502077	1.04306	0.311121	0.944415	-4.59516
P16118	0.263547	0.134308	1.04251	0.31137	0.944415	-4.59524
Q9NPC6	-0.409961	0.101629	-1.03946	0.312745	0.944415	-4.59572
P21266	0.259642	0.0291442	1.03794	0.313434	0.944415	-4.59595
Q15386	0.236999	-0.12362	1.03633	0.314161	0.944415	-4.5962
Q96JB5	0.254157	0.0301384	1.0354	0.314584	0.944415	-4.59635
P49593	0.239012	-0.134818	1.03468	0.31491	0.944415	-4.59646
Q6P1A2	0.312403	0.185727	1.03459	0.314951	0.944415	-4.59647
A0A286YFJ8	0.36693	0.323558	1.03285	0.315742	0.944415	-4.59674
Q9BYD2	0.228316	0.0454691	1.03252	0.315895	0.944415	-4.59679
Q8TCA0	0.216999	-0.0533573	1.03193	0.316162	0.944415	-4.59688
O95373	0.244326	0.0525264	1.03035	0.316881	0.944415	-4.59713
Q9UKP3	0.273293	0.0312206	1.03031	0.316898	0.944415	-4.59713
P00918	0.232888	-0.0381404	1.02798	0.317964	0.944415	-4.59749
Q9NR31	0.292251	0.145057	1.02781	0.318043	0.944415	-4.59752
P07737	0.246537	0.113407	1.02756	0.318154	0.944415	-4.59756
Q9Y5P6	0.242339	-0.146115	1.02732	0.318265	0.944415	-4.59759
Q9BWH2	0.208895	-0.0859618	1.0265	0.318643	0.944415	-4.59772
A5D6W6	0.24684	0.0809796	1.02394	0.319814	0.944415	-4.59811
Q9NZC3	0.266333	0.110012	1.02292	0.320282	0.944415	-4.59827
P36871	0.200836	0.0280513	1.02292	0.320285	0.944415	-4.59827
Q53GQ0	0.264432	-0.00494189	1.02142	0.320973	0.944415	-4.5985
Q5T013	-0.275673	-0.0875751	-1.02037	0.321458	0.944415	-4.59866
P16298	0.199987	-0.0714972	1.01877	0.322195	0.944415	-4.59891
P22059	0.236883	0.056831	1.01802	0.322541	0.944415	-4.59902
P12956	-0.278956	0.0390416	-1.01758	0.322746	0.944415	-4.59909
Q9UK76	-0.212329	0.0185076	-1.01565	0.323638	0.944415	-4.59938
Q9Y266	0.238534	0.0593937	1.01562	0.323651	0.944415	-4.59939
Q8TDX7	0.232759	-0.00519511	1.01491	0.32398	0.944415	-4.59949
Q9Y4X5	0.232623	0.14306	1.01475	0.324056	0.944415	-4.59952
Q7Z460	0.238436	-0.0287771	1.0139	0.324451	0.944415	-4.59965
P78527	0.241759	0.0437171	1.01236	0.325164	0.944415	-4.59988
O14980	0.272867	0.0211636	1.01223	0.325225	0.944415	-4.5999
P11233	0.236405	0.0854656	1.0111	0.325748	0.944415	-4.60007
O43181	-0.224392	-0.250646	-1.0097	0.326401	0.944415	-4.60029
Q9H2G2	0.217374	0.0821687	1.00935	0.326565	0.944415	-4.60034
O14531	0.334775	0.0309349	1.009	0.326727	0.944415	-4.60039
Q9NUJ1	0.282922	-0.0223663	1.00846	0.326982	0.944415	-4.60048
Q8WZA0	0.207888	0.0348737	1.00783	0.327276	0.944415	-4.60057
Q9BVJ7	0.281327	0.184189	1.00607	0.328094	0.944415	-4.60084
P33176	0.218328	0.0786315	1.00278	0.329639	0.944415	-4.60134
Q99685	0.216995	-0.0774924	1.00156	0.33021	0.944415	-4.60152
Q9HBK9	0.278298	0.134813	1.00145	0.33026	0.944415	-4.60153
Q93008	0.213019	-0.0032906	0.999284	0.331279	0.944415	-4.60186
A4D2J0	0.225006	-0.211026	0.998493	0.331652	0.944415	-4.60198
P59998	0.267658	0.131144	0.997191	0.332266	0.944415	-4.60218
Q13144	0.229912	-0.00761977	0.995357	0.333132	0.944415	-4.60245
O60749	0.251562	0.0843615	0.994751	0.333418	0.944415	-4.60254
P16157	0.342515	0.152597	0.992807	0.334339	0.944415	-4.60283
Q96AQ6	0.179777	-0.00823964	0.992754	0.334364	0.944415	-4.60284
Q9NP72	0.246305	0.042331	0.990783	0.335298	0.944415	-4.60314
Q9Y6W5	0.210938	0.0914701	0.989109	0.336094	0.944415	-4.60339
P23141	0.36072	0.0185027	0.987436	0.33689	0.944415	-4.60364
P61201	0.263568	0.0322993	0.986872	0.337159	0.944415	-4.60372
P05387	-0.177487	-0.0932767	-0.982721	0.339141	0.944415	-4.60434
O60220	-0.204727	-0.220817	-0.981326	0.33981	0.944415	-4.60454
Q13617	0.252936	0.0285508	0.980522	0.340195	0.944415	-4.60466
Q969Z3	0.205283	0.205638	0.980334	0.340285	0.944415	-4.60469
Q96AG4	-0.294359	0.00185456	-0.978626	0.341105	0.944415	-4.60494
Q9Y376	0.22735	0.0947428	0.977128	0.341825	0.944415	-4.60517
P04217	0.268988	0.214334	0.974458	0.343112	0.944415	-4.60556
Q9UHB9	-0.197751	-0.00835927	-0.974408	0.343136	0.944415	-4.60557
P43034	0.277932	0.0767829	0.97398	0.343342	0.944415	-4.60563
O00757	0.22549	0.0405602	0.973514	0.343567	0.944415	-4.6057
Q16778	-0.699546	0.159727	-0.972462	0.344076	0.944415	-4.60585
O60493	0.191928	0.0207057	0.972424	0.344094	0.944415	-4.60586
Q7Z2W9	0.221854	0.168647	0.97038	0.345083	0.944415	-4.60616
Q15772	0.161599	-0.045877	0.966949	0.346748	0.944415	-4.60666
P51665	0.202731	-0.0334469	0.965278	0.347561	0.944415	-4.60691
Q16654	0.219354	-0.27999	0.964139	0.348116	0.944415	-4.60708
P51648	0.253647	0.0264206	0.963593	0.348382	0.944415	-4.60716
P46020	0.211569	0.159356	0.961905	0.349206	0.944415	-4.6074
Q06432	0.191374	-0.0382759	0.961736	0.349288	0.944415	-4.60743
P20807	0.208886	0.0011498	0.960712	0.349788	0.944415	-4.60758
P09012	0.172916	-0.0164938	0.960172	0.350053	0.944415	-4.60765
P56537	-0.230592	-0.184665	-0.959205	0.350526	0.944415	-4.6078
P38159	-0.241185	-0.097669	-0.957458	0.351382	0.944415	-4.60805
Q9BZV1	0.191304	0.00491039	0.956841	0.351685	0.944415	-4.60814
P38606	0.235799	0.082974	0.956712	0.351748	0.944415	-4.60816
P10515	0.230078	-0.0389761	0.953279	0.353436	0.944415	-4.60866
Q9C0C2	0.212328	0.0107041	0.95244	0.353849	0.944415	-4.60878
P30041	0.2241	0.029689	0.952004	0.354064	0.944415	-4.60884
P29144	0.219705	0.0926581	0.95185	0.35414	0.944415	-4.60886
Q7Z417	-0.217063	-0.0525012	-0.950466	0.354823	0.944415	-4.60906
Q8NFH4	0.239366	0.0444212	0.948411	0.355839	0.944415	-4.60936
O75506	0.165059	0.024157	0.947854	0.356114	0.944415	-4.60944
Q14232	0.241689	-0.00249456	0.947295	0.356391	0.944415	-4.60952
P16104	-0.627777	0.0603003	-0.947267	0.356405	0.944415	-4.60952
P02760	0.231425	0.140305	0.946027	0.35702	0.944415	-4.6097
Q12797	-0.2113	0.0538573	-0.945576	0.357243	0.944415	-4.60977
Q9NZU5	-0.184694	0.0181628	-0.945487	0.357287	0.944415	-4.60978
Q93100	0.185403	0.0925862	0.944809	0.357624	0.944415	-4.60988
P20851	-0.332472	0.229458	-0.94113	0.359454	0.944415	-4.61041
P09601	-0.252847	0.0660843	-0.93942	0.360306	0.944415	-4.61065
Q8IWX7	0.1843	0.0724547	0.937933	0.361048	0.944415	-4.61086
P07195	0.246092	-0.0227038	0.937053	0.361488	0.944415	-4.61099
Q8TCJ2	0.181966	0.035073	0.93418	0.362927	0.944415	-4.6114
Q6PH85	0.191188	0.0520465	0.93213	0.363956	0.944415	-4.61169
Q5VW32	0.20577	0.0282436	0.931484	0.364281	0.944415	-4.61178
P07814	0.210105	-0.144808	0.931384	0.364331	0.944415	-4.6118
O00232	0.199965	-0.0208169	0.930511	0.36477	0.944415	-4.61192
Q00013	0.271813	0.0800384	0.930154	0.36495	0.944415	-4.61197
O96008	-0.235243	-0.311605	-0.929949	0.365053	0.944415	-4.612
Q16531	0.214244	0.0509908	0.929895	0.36508	0.944415	-4.61201
Q9UH92	0.182042	-0.00866858	0.929228	0.365416	0.944415	-4.6121
P23526	0.213976	0.0523546	0.928972	0.365545	0.944415	-4.61214
O95210	0.194258	0.0319704	0.928716	0.365674	0.944415	-4.61218
Q9Y394	0.276409	0.2443	0.928503	0.365782	0.944415	-4.61221
Q96QR8	-0.201976	-0.0759606	-0.927035	0.366522	0.944415	-4.61242
P54136	0.244387	0.0501137	0.92627	0.366908	0.944415	-4.61252
Q9UIC8	0.249368	0.0664442	0.923066	0.368529	0.944415	-4.61298
Q99615	0.201995	0.0346446	0.920539	0.369812	0.944415	-4.61333
O15212	-0.176964	0.0106841	-0.919749	0.370213	0.944415	-4.61344
O95782	0.22367	0.11699	0.918466	0.370865	0.944415	-4.61362
Q9H845	0.236308	0.0487457	0.917684	0.371263	0.944415	-4.61373
Q7L3T8	0.300223	0.0606332	0.917637	0.371288	0.944415	-4.61374
Q9Y2Q3	0.258415	0.050438	0.917517	0.371348	0.944415	-4.61376
Q15149	0.164144	0.0793341	0.917132	0.371545	0.944415	-4.61381
Q9UJU6	0.162374	-0.0817447	0.915618	0.372317	0.944415	-4.61402
P11047	0.24812	0.173918	0.914745	0.372762	0.944415	-4.61415
Q9NZB2	-0.159632	-0.0518004	-0.914459	0.372908	0.944415	-4.61419
P16152	0.237549	0.0613733	0.914124	0.373079	0.944415	-4.61423
Q9Y4G6	0.151325	-0.0402887	0.909606	0.375393	0.944415	-4.61486
O95299	0.220173	-0.0221971	0.909074	0.375666	0.944415	-4.61494
P05413	-0.178447	-0.259577	-0.906995	0.376734	0.944415	-4.61523
P55060	0.223469	0.0582764	0.905786	0.377356	0.944415	-4.6154
O75891	0.18812	0.0796017	0.904964	0.377779	0.944415	-4.61551
P54578	0.230188	0.0937773	0.904911	0.377807	0.944415	-4.61552
Q92995	0.234552	0.0197126	0.903435	0.378567	0.944415	-4.61572
Q9H1K0	0.209145	0.00077639	0.901467	0.379584	0.944415	-4.61599
P55268	0.259228	-0.122988	0.90098	0.379835	0.944415	-4.61606
P26583	0.20756	-0.270777	0.899392	0.380657	0.944415	-4.61628
P12109	-0.320642	-0.164547	-0.898489	0.381125	0.944415	-4.61641
O14734	0.162802	-0.140843	0.897923	0.381419	0.944415	-4.61648
P02649	0.244788	0.271865	0.894949	0.382963	0.944415	-4.61689
Q7Z4V5	0.187356	-0.137518	0.894232	0.383336	0.944415	-4.61699
P17987	0.234473	0.00940185	0.891212	0.384909	0.944415	-4.61741
P07360	0.270068	0.093624	0.88894	0.386095	0.944415	-4.61772
O14545	0.225072	-0.0784605	0.888607	0.38627	0.944415	-4.61776
P10644	0.189544	0.00868529	0.887472	0.386863	0.944415	-4.61792
P21817	0.179333	0.00673477	0.886837	0.387196	0.944415	-4.618
Q9NZL4	-0.331611	0.285112	-0.886327	0.387463	0.944415	-4.61807
O95183	0.186878	0.00752197	0.886218	0.38752	0.944415	-4.61809
Q92541	0.206284	-0.0590986	0.885894	0.38769	0.944415	-4.61813
Q8N5K1	0.170817	0.0152853	0.885882	0.387697	0.944415	-4.61813
Q14693	0.188047	-0.098343	0.885602	0.387843	0.944415	-4.61817
Q13061	-0.277106	-0.111055	-0.885528	0.387882	0.944415	-4.61818
Q8TDI0	0.220358	-0.0189369	0.884781	0.388274	0.944415	-4.61828
Q8IZU0	0.382315	0.212703	0.884361	0.388494	0.944415	-4.61834
Q9Y230	0.210083	0.0269119	0.883683	0.388851	0.944415	-4.61843
O60271	0.212622	0.0959612	0.880646	0.390448	0.944415	-4.61885
Q8WVJ2	0.152755	-0.161824	0.879884	0.390849	0.944415	-4.61895
Q8WXA9	0.171468	-0.0430048	0.878071	0.391806	0.944415	-4.61919
Q8IWJ2	-0.293253	0.065994	-0.873614	0.394163	0.944415	-4.6198
O00159	0.20785	0.0189963	0.872213	0.394906	0.944415	-4.61999
Q16082	-0.182507	-0.108231	-0.872024	0.395006	0.944415	-4.62001
O75923	0.208794	0.0896994	0.869366	0.396419	0.944415	-4.62037
Q13162	0.176044	0.131709	0.869279	0.396465	0.944415	-4.62038
P40763	0.187399	0.0593322	0.868661	0.396793	0.944415	-4.62046
O43676	0.197001	-0.0599955	0.866314	0.398044	0.944415	-4.62078
Q8IWA4	0.206996	0.00870052	0.866189	0.398111	0.944415	-4.62079
Q9BXI3	-0.187387	0.124981	-0.865619	0.398415	0.944415	-4.62087
P13807	0.215866	-0.0215461	0.865482	0.398488	0.944415	-4.62089
O14925	0.199524	-0.0104258	0.865098	0.398693	0.944415	-4.62094
Q15814	0.201181	0.0988274	0.863935	0.399314	0.944415	-4.62109
Q9BRC7	0.219954	-0.00568572	0.862695	0.399977	0.944415	-4.62126
P11717	0.17325	-0.0137228	0.862078	0.400308	0.944415	-4.62134
Q9H7Z7	0.239214	0.000577955	0.861288	0.400731	0.944415	-4.62145
Q8TBC4	0.198354	0.132312	0.8594	0.401743	0.944415	-4.6217
Q05519	0.233385	0.0168548	0.858727	0.402105	0.944415	-4.62179
Q9NQG5	0.202648	-0.077859	0.858009	0.40249	0.944415	-4.62188
Q9P0J0	0.178793	-0.308461	0.857203	0.402923	0.944415	-4.62199
O95721	-0.145482	-0.0341004	-0.85601	0.403565	0.944415	-4.62215
Q7Z7H5	0.193539	-0.019227	0.853194	0.405082	0.944415	-4.62252
Q9NRZ7	0.175427	-0.00631611	0.852532	0.40544	0.944415	-4.62261
P62937	0.14753	0.014202	0.851437	0.406031	0.944415	-4.62275
Q9UNS2	0.201497	-0.0035193	0.849956	0.406832	0.944415	-4.62295
P55327	0.175666	-0.0990217	0.848114	0.407829	0.944415	-4.62319
P28161	0.201058	0.0391072	0.844422	0.409833	0.944415	-4.62367
O76021	-0.225126	-0.0107424	-0.841376	0.411491	0.944415	-4.62407
P54652	0.198643	0.0829107	0.840919	0.41174	0.944415	-4.62413
P08779	-0.482894	0.494031	-0.840908	0.411746	0.944415	-4.62413
Q9NQR4	0.192009	-0.0111453	0.840831	0.411788	0.944415	-4.62414
P53618	0.223058	0.0962303	0.840348	0.412052	0.944415	-4.62421
Q9NXG2	0.197217	0.196201	0.839854	0.412322	0.944415	-4.62427
Q6PI78	0.195687	-0.0177721	0.837704	0.413496	0.944415	-4.62455
O43488	0.173278	-0.00708785	0.837674	0.413512	0.944415	-4.62455
Q08211	-0.146271	0.0522682	-0.837038	0.41386	0.944415	-4.62464
Q16740	0.208086	0.0770552	0.835115	0.414913	0.944415	-4.62489
Q8IX12	0.17197	-0.00703365	0.834039	0.415503	0.944415	-4.62503
Q14247	0.153241	-0.0362019	0.833075	0.416032	0.944415	-4.62515
P62269	0.196092	0.0362413	0.83292	0.416117	0.944415	-4.62517
P51570	0.161821	0.0535379	0.832176	0.416525	0.944415	-4.62527
Q99541	0.22659	0.0411744	0.8314	0.416952	0.944415	-4.62537
P02765	0.224997	0.16731	0.830701	0.417336	0.944415	-4.62546
P21399	0.196514	0.0215532	0.830475	0.41746	0.944415	-4.62549
P31153	0.185772	0.00703742	0.830454	0.417472	0.944415	-4.62549
P16401	0.286563	0.309917	0.829512	0.41799	0.944415	-4.62561
P16989	-0.173378	-0.119198	-0.828285	0.418666	0.944415	-4.62577
Q9UJZ1	0.186018	-0.0446091	0.827316	0.419201	0.944415	-4.62589
O95433	0.19325	0.0627525	0.82656	0.419617	0.944415	-4.62599
Q5JTJ3	-0.1819	-0.262308	-0.826012	0.41992	0.944415	-4.62606
Q9H3S7	0.198968	-0.149737	0.825574	0.420162	0.944415	-4.62612
P49189	0.185954	0.0230793	0.82471	0.420639	0.944415	-4.62623
Q8WW59	0.229186	0.0149774	0.824246	0.420896	0.944415	-4.62629
P49585	0.189134	-0.00326117	0.824053	0.421003	0.944415	-4.62631
P06732	0.181959	0.056804	0.822196	0.42203	0.944415	-4.62655
Q9NUQ8	0.181334	0.080984	0.821835	0.422231	0.944415	-4.6266
P50570	0.185047	0.0233053	0.819945	0.423279	0.944415	-4.62684
Q8N6M3	0.321056	0.248924	0.819256	0.423662	0.944415	-4.62693
Q9UJ68	0.202152	0.0759806	0.81914	0.423726	0.944415	-4.62694
P15880	-0.170236	0.0269433	-0.815385	0.425814	0.944415	-4.62742
Q96B97	-0.16549	-0.234555	-0.81299	0.42715	0.944415	-4.62772
O43819	0.18858	0.0648009	0.812844	0.427232	0.944415	-4.62774
Q9Y3I0	-0.145835	0.0145773	-0.810673	0.428445	0.944415	-4.62802
O43390	-0.155893	-0.0840963	-0.810261	0.428675	0.944415	-4.62807
Q13084	-0.177386	0.0857258	-0.808021	0.42993	0.944415	-4.62835
Q15172	0.195051	0.0290669	0.806729	0.430654	0.944415	-4.62851
Q12955	0.162403	0.0601588	0.806104	0.431005	0.944415	-4.62859
P39656	0.220079	0.105276	0.805312	0.43145	0.944415	-4.62869
Q96I36	0.210566	0.0651598	0.804141	0.432108	0.944415	-4.62884
P02769	0.346217	0.0649396	0.79677	0.436265	0.944415	-4.62976
P10636	-0.151668	-0.0778529	-0.794764	0.437401	0.944415	-4.63001
Q8N766	0.198024	-0.10478	0.794653	0.437464	0.944415	-4.63002
P27169	0.32427	0.315429	0.79321	0.438282	0.944415	-4.6302
P16949	0.16943	-0.0759018	0.786704	0.441983	0.944415	-4.63101
Q9UBS4	-0.15106	0.0371513	-0.786691	0.44199	0.944415	-4.63101
Q9BU89	-0.193103	0.0279435	-0.783855	0.443609	0.944415	-4.63136
Q08378	-0.225526	-0.081079	-0.782505	0.444381	0.944415	-4.63152
Q08043	0.412716	0.14212	0.78107	0.445203	0.944415	-4.6317
Q96MF6	0.191788	-0.0992791	0.780664	0.445436	0.944415	-4.63175
P25325	0.174814	0.0143674	0.780393	0.445591	0.944415	-4.63178
P67775	0.181816	0.0640289	0.77903	0.446373	0.944415	-4.63195
Q16629	-0.224545	-0.141454	-0.778543	0.446652	0.944415	-4.63201
P63244	0.186974	0.0321697	0.778124	0.446893	0.944415	-4.63206
Q92973	0.180453	0.128364	0.777759	0.447102	0.944415	-4.6321
Q14974	0.188042	0.105737	0.77749	0.447257	0.944415	-4.63213
P13674	-0.181916	0.255731	-0.773349	0.44964	0.944415	-4.63264
Q6PKG0	-0.132514	0.0872477	-0.773032	0.449823	0.944415	-4.63268
P16333	0.169977	0.00754056	0.771109	0.450932	0.944415	-4.63291
P30613	0.277797	-0.00484314	0.770828	0.451095	0.944415	-4.63294
Q8WWV3	0.22573	0.00117691	0.770822	0.451098	0.944415	-4.63294
P03952	0.300566	0.146542	0.770347	0.451373	0.944415	-4.633
Q5SV97	-0.195631	-0.140215	-0.770314	0.451392	0.944415	-4.633
Q9BUE6	0.161863	-0.0630536	0.769953	0.451601	0.944415	-4.63305
Q92696	0.168362	-0.0248331	0.769595	0.451807	0.944415	-4.63309
Q3ZCQ8	0.19899	0.0562566	0.769437	0.451899	0.944415	-4.63311
Q9Y512	0.188398	-0.00121886	0.768817	0.452257	0.944415	-4.63319
P49755	0.208884	0.0711427	0.768535	0.45242	0.944415	-4.63322
Q86X55	0.224691	0.287588	0.768118	0.452661	0.944415	-4.63327
O43242	0.179219	0.0427145	0.767807	0.452842	0.944415	-4.63331
Q8IWW8	0.152169	-0.113507	0.766465	0.453619	0.944415	-4.63347
O75935	0.165237	0.0511909	0.765977	0.453902	0.944415	-4.63353
P09104	0.220168	0.122076	0.765865	0.453967	0.944415	-4.63354
Q14696	0.162459	-0.0545314	0.764459	0.454783	0.944415	-4.63371
Q9UMX0	0.135053	-0.0412184	0.76445	0.454788	0.944415	-4.63371
P35580	0.218903	0.0404261	0.762869	0.455706	0.944415	-4.6339
Q06210	-0.217089	0.21235	-0.76214	0.45613	0.944415	-4.63399
P34955	0.277133	0.248446	0.759523	0.457653	0.944415	-4.6343
Q9HBH5	0.203826	0.0690876	0.759497	0.457668	0.944415	-4.6343
Q15813	0.15823	-0.03025	0.756963	0.459147	0.944415	-4.63461
Q92734	0.165835	0.0475541	0.756698	0.459301	0.944415	-4.63464
P0C7P0	0.169834	-0.106169	0.756431	0.459457	0.944415	-4.63467
Q9UBF2	0.197456	0.0450814	0.756079	0.459663	0.944415	-4.63471
Q5HYK3	0.18442	-0.0738931	0.756068	0.459669	0.944415	-4.63471
Q8N3V7	-0.193207	-0.103577	-0.755889	0.459774	0.944415	-4.63473
Q58WW2	0.170222	0.0465444	0.754705	0.460466	0.944415	-4.63487
O95487	0.188693	0.115962	0.754633	0.460508	0.944415	-4.63488
Q15388	0.145216	-0.121652	0.754388	0.460651	0.944415	-4.63491
O43583	-0.148426	-0.136872	-0.75386	0.46096	0.944415	-4.63497
Q9NSK0	0.15278	-0.0348167	0.75326	0.461311	0.944415	-4.63505
P01031	0.277598	0.206299	0.751355	0.462428	0.944415	-4.63527
Q86Y39	0.198537	-0.1061	0.751243	0.462494	0.944415	-4.63528
Q13526	-0.150905	-0.10448	-0.748954	0.463837	0.944415	-4.63555
Q16204	0.159964	-0.0372989	0.748551	0.464074	0.944415	-4.6356
P61457	-0.156476	-0.154565	-0.747282	0.46482	0.944415	-4.63575
Q9BXV9	-0.155501	-0.267345	-0.747128	0.464911	0.944415	-4.63577
P07741	0.18113	0.0131701	0.745703	0.465749	0.944415	-4.63594
P55072	0.174756	0.0284845	0.74443	0.4665	0.944415	-4.63609
O95865	0.178479	0.102692	0.744363	0.466539	0.944415	-4.63609
Q9UI09	0.171476	-0.0681979	0.74169	0.468116	0.944415	-4.63641
Q9Y2J8	0.203586	0.210893	0.741242	0.468381	0.944415	-4.63646
P06213	-0.170831	-0.0239005	-0.736137	0.471404	0.944415	-4.63705
P62829	0.175408	-0.00315481	0.734842	0.472172	0.944415	-4.6372
Q9Y3C6	0.182429	-0.00886737	0.733703	0.472849	0.944415	-4.63734
Q86WB0	0.17324	0.168799	0.73362	0.472898	0.944415	-4.63735
P13639	0.186624	0.0777892	0.732035	0.473841	0.944415	-4.63753
P82663	-0.179806	-0.0264117	-0.731659	0.474065	0.944415	-4.63757
Q06830	0.148212	0.0340662	0.731141	0.474373	0.944415	-4.63763
Q13151	0.154556	0.0519502	0.730218	0.474923	0.944415	-4.63774
Q13505	0.199717	0.0473934	0.729722	0.475218	0.944415	-4.6378
Q9BV47	-0.149083	-0.154263	-0.729322	0.475457	0.944415	-4.63784
Q9H479	0.181708	-0.0503254	0.729085	0.475598	0.944415	-4.63787
Q5JSH3	0.15031	-0.0447587	0.727336	0.476642	0.944415	-4.63807
P56277	-0.19981	0.0151897	-0.726048	0.477411	0.944415	-4.63822
O15357	0.190299	0.0633049	0.724271	0.478474	0.944415	-4.63842
Q13885	0.199512	0.116267	0.721211	0.480308	0.944415	-4.63877
O75340	0.122336	-0.13483	0.718427	0.48198	0.944415	-4.63909
P53621	0.172502	0.063602	0.718217	0.482106	0.944415	-4.63911
Q15046	0.156361	-0.00743974	0.716513	0.483131	0.944415	-4.63931
P34949	0.152442	-0.00332021	0.716021	0.483428	0.944415	-4.63936
Q9HB71	0.179038	0.0580403	0.711865	0.485934	0.944415	-4.63983
P48735	0.18821	0.00379518	0.710977	0.486471	0.944415	-4.63993
Q9BX66	-0.132967	-0.195144	-0.710464	0.486781	0.944415	-4.63999
P19652	0.222903	0.0723133	0.710081	0.487012	0.944415	-4.64003
O94905	0.16867	0.0385214	0.709803	0.487181	0.944415	-4.64006
P08559	0.160113	-0.0807147	0.709656	0.487269	0.944415	-4.64008
Q9Y305	0.170416	-0.0347697	0.709506	0.48736	0.944415	-4.6401
Q14240	0.163807	0.0604932	0.706999	0.488879	0.944415	-4.64038
Q9BV57	-0.185912	0.229373	-0.706094	0.489427	0.944415	-4.64048
Q5T619	0.289896	0.22241	0.703549	0.490972	0.944415	-4.64076
Q9NQL2	0.176145	0.0328688	0.70331	0.491117	0.944415	-4.64079
Q13724	-0.148206	-0.11273	-0.702465	0.491632	0.944415	-4.64088
P60891	0.187128	0.126458	0.70171	0.492091	0.944415	-4.64097
P15954	0.154994	-0.0225922	0.701335	0.492319	0.944415	-4.64101
O43719	0.134587	0.0633041	0.700567	0.492787	0.944415	-4.6411
P30043	0.19636	0.0414436	0.700449	0.492858	0.944415	-4.64111
O94874	0.166115	0.0288012	0.699763	0.493276	0.944415	-4.64118
P69891	0.283071	0.0491483	0.698751	0.493893	0.944415	-4.6413
Q01081	0.182108	0.132218	0.697947	0.494384	0.944415	-4.64139
P35237	0.173274	0.0610101	0.696862	0.495046	0.944415	-4.64151
Q9NX55	0.126378	-0.0885577	0.69626	0.495414	0.944415	-4.64157
Q12846	0.142479	0.0813602	0.696231	0.495431	0.944415	-4.64158
P31415	0.128844	0.0646999	0.694705	0.496364	0.944415	-4.64174
Q9Y5K5	0.181029	0.117814	0.694617	0.496418	0.944415	-4.64175
Q13618	0.160083	0.0815838	0.693628	0.497023	0.944415	-4.64186
P27694	0.13227	0.0413939	0.693203	0.497283	0.944415	-4.64191
O43681	0.155023	0.0614132	0.692211	0.497891	0.944415	-4.64202
Q9BV81	0.135618	-0.0507213	0.691451	0.498356	0.944415	-4.6421
O75533	0.123591	0.00357418	0.69034	0.499038	0.944415	-4.64222
P62081	0.157799	-0.0484251	0.690214	0.499115	0.944415	-4.64224
P17980	0.167961	0.0214683	0.690093	0.499189	0.944415	-4.64225
P22695	0.168612	-0.0592682	0.689276	0.499691	0.944415	-4.64234
Q00577	-0.138918	-0.0939184	-0.68899	0.499866	0.944415	-4.64237
O95817	-0.127454	-0.167004	-0.688115	0.500404	0.944415	-4.64247
P42224	0.235429	-0.044871	0.687933	0.500516	0.944415	-4.64249
A1L188	-0.189063	-0.137917	-0.687166	0.500987	0.944415	-4.64257
P82650	-0.127124	-0.0529375	-0.687	0.501089	0.944415	-4.64259
O95394	0.152058	-0.00416861	0.686763	0.501235	0.944415	-4.64261
P40222	0.154682	-0.0269568	0.686137	0.50162	0.944415	-4.64268
Q9HA77	0.141491	0.0018445	0.685293	0.502139	0.944415	-4.64278
Q16630	0.161171	-0.00426423	0.685186	0.502205	0.944415	-4.64279
Q15018	0.156914	0.0192026	0.683036	0.50353	0.944415	-4.64302
Q8TDL5	0.218602	-0.14255	0.682648	0.50377	0.944415	-4.64306
Q7L5D6	0.213014	0.104004	0.6811	0.504725	0.944415	-4.64323
Q96GX9	0.168193	-0.0527204	0.679797	0.505529	0.944415	-4.64337
Q8NCN5	0.16623	-0.0544917	0.679657	0.505616	0.944415	-4.64339
P42025	-0.112015	0.0592863	-0.678389	0.5064	0.944415	-4.64352
Q96BR5	0.139727	-0.201839	0.676449	0.507601	0.944415	-4.64373
Q9Y2I8	0.155242	0.134926	0.675637	0.508104	0.944415	-4.64382
P54920	0.146986	0.0682533	0.675259	0.508339	0.944415	-4.64386
Q14197	0.157033	0.0815823	0.675131	0.508418	0.944415	-4.64387
Q86WA6	0.160184	-0.0558645	0.674915	0.508552	0.944415	-4.6439
Q9Y6G9	0.162944	0.0564968	0.674408	0.508867	0.944415	-4.64395
Q92804	-0.136127	-0.137415	-0.673247	0.509587	0.944415	-4.64408
Q8NBU5	0.147381	0.0378379	0.672678	0.50994	0.944415	-4.64414
P05114	0.199317	-0.190869	0.672473	0.510068	0.944415	-4.64416
Q9Y6B6	0.156954	0.0461253	0.672328	0.510158	0.944415	-4.64417
P35908	0.444549	0.270628	0.671903	0.510422	0.944415	-4.64422
P06702	0.304409	-0.120031	0.670103	0.511541	0.944415	-4.64441
Q7LBR1	-0.126383	0.00431009	-0.668971	0.512246	0.944415	-4.64453
O75155	0.155006	0.00779463	0.665699	0.514286	0.944415	-4.64488
O00231	0.171914	0.121317	0.665337	0.514512	0.944415	-4.64492
P01023	0.250606	0.357967	0.663944	0.515382	0.944415	-4.64507
O75947	-0.130909	-0.0653043	-0.659872	0.51793	0.944415	-4.6455
Q9NTZ6	0.178357	-0.0984318	0.657709	0.519286	0.944415	-4.64572
Q9Y2Z0	0.133085	-0.0731564	0.65757	0.519374	0.944415	-4.64574
P00739	0.231041	0.0122871	0.656977	0.519746	0.944415	-4.6458
P68366	0.156887	0.146747	0.65605	0.520328	0.944415	-4.6459
Q14315	0.151077	-0.0869379	0.655374	0.520753	0.944415	-4.64597
O95644	-0.160794	-0.023046	-0.653828	0.521725	0.944415	-4.64613
O95278	0.155019	0.0141891	0.652467	0.522582	0.944415	-4.64627
P50583	0.141927	-0.0704819	0.652431	0.522605	0.944415	-4.64628
Q6XQN6	0.127453	-0.0390205	0.651647	0.523098	0.944415	-4.64636
Q14204	0.166218	0.0750627	0.651591	0.523134	0.944415	-4.64636
O94826	0.150077	-0.0238035	0.650902	0.523568	0.944415	-4.64643
P14868	0.149178	0.0425833	0.650468	0.523842	0.944415	-4.64648
P62834	0.185695	-0.11293	0.649394	0.524519	0.944415	-4.64659
Q9UII2	-0.137617	-0.194394	-0.64573	0.526834	0.944415	-4.64697
Q9BV79	0.144115	-0.0355003	0.64503	0.527277	0.944415	-4.64704
Q92896	0.173224	0.0992983	0.644991	0.527302	0.944415	-4.64705
Q15006	0.132524	-0.107267	0.644506	0.527609	0.944415	-4.6471
P01024	0.243953	0.292712	0.64422	0.52779	0.944415	-4.64713
O43615	0.148343	-0.0170689	0.643473	0.528263	0.944415	-4.6472
O95168	0.1338	-0.13199	0.642533	0.528859	0.944415	-4.6473
Q9NZZ3	-0.119741	-0.0913261	-0.639866	0.530551	0.944415	-4.64757
P28074	-0.116883	-0.104978	-0.63679	0.532507	0.944415	-4.64789
Q6P587	0.154949	0.0609312	0.636503	0.53269	0.944415	-4.64792
P35555	-0.311842	0.129617	-0.636315	0.532809	0.944415	-4.64794
Q13976	0.160423	0.0317016	0.635448	0.533361	0.944415	-4.64802
Q9NPJ3	0.174379	0.0237106	0.633977	0.534299	0.944415	-4.64817
Q9H7C9	-0.111608	-0.0204219	-0.633491	0.534608	0.944415	-4.64822
P62495	0.143363	0.0922555	0.633167	0.534815	0.944415	-4.64825
P09488	0.19712	-0.0382065	0.63121	0.536064	0.944415	-4.64845
Q9Y3F4	0.148634	0.0739445	0.630631	0.536434	0.944415	-4.64851
P62140	0.143278	0.0316597	0.63049	0.536524	0.944415	-4.64853
Q5JRA6	0.127589	0.00544188	0.629512	0.537149	0.944415	-4.64862
Q7LG56	0.162436	0.126212	0.628322	0.537911	0.944415	-4.64874
A2RRE8	-0.117753	-0.0354704	-0.628054	0.538082	0.944415	-4.64877
Q8NE86	0.145852	-0.00344659	0.627366	0.538522	0.944415	-4.64884
Q15631	0.160055	0.0508273	0.627313	0.538556	0.944415	-4.64885
O14744	0.136544	0.0273491	0.626149	0.539302	0.944415	-4.64896
Q15119	0.160848	-0.0932096	0.625945	0.539432	0.944415	-4.64898
P04843	0.115001	-0.0154914	0.625723	0.539575	0.944415	-4.64901
O43674	0.138795	-0.17343	0.625649	0.539622	0.944415	-4.64901
P61221	0.142685	0.00627242	0.625642	0.539627	0.944415	-4.64901
Q8N3K9	0.124281	-0.158746	0.624224	0.540536	0.944415	-4.64916
Q9BXB4	0.161536	0.0196205	0.623673	0.54089	0.944415	-4.64921
O60841	0.124236	-0.0186971	0.622958	0.541349	0.944415	-4.64928
Q8IWV7	0.146199	0.107515	0.62	0.54325	0.944415	-4.64958
P23258	0.156464	-0.382987	0.619543	0.543544	0.944415	-4.64962
P09972	0.149	0.0562858	0.619285	0.54371	0.944415	-4.64965
Q13542	-0.161767	-0.132151	-0.618346	0.544315	0.944415	-4.64974
Q9UDW1	0.180981	-0.0566245	0.617044	0.545154	0.944415	-4.64987
Q99747	-0.112005	0.0579677	-0.61641	0.545562	0.944415	-4.64993
Q5BKX8	0.107303	0.0682881	0.614014	0.547108	0.944415	-4.65017
Q9UBC2	0.136512	-0.0971865	0.61339	0.547512	0.944415	-4.65023
Q6GQQ9	0.163755	0.104613	0.612982	0.547775	0.944415	-4.65027
Q96I99	0.178901	-0.0424195	0.612654	0.547987	0.944415	-4.6503
Q8NC51	-0.11042	-0.156219	-0.611508	0.548728	0.944415	-4.65042
Q13907	0.156783	-0.0468808	0.608906	0.550413	0.944415	-4.65067
P40123	0.122155	0.0364007	0.607287	0.551462	0.944415	-4.65083
P82909	-0.111771	-0.209914	-0.603184	0.554127	0.944415	-4.65123
O43396	0.137075	-0.0305047	0.602192	0.554772	0.944415	-4.65132
P24298	0.139254	-0.0464744	0.601252	0.555383	0.944415	-4.65141
Q9UMS4	-0.141764	-0.189466	-0.59977	0.556349	0.944415	-4.65156
Q9Y277	0.162097	-0.00207329	0.598365	0.557265	0.944415	-4.65169
O95831	0.13624	-0.0356253	0.598234	0.557351	0.944415	-4.6517
Q53FT3	0.200261	-0.0460903	0.597574	0.557781	0.944415	-4.65177
P04792	0.124204	-0.0469377	0.596084	0.558754	0.944415	-4.65191
O14949	0.125374	-0.0382916	0.594468	0.55981	0.944415	-4.65207
Q9Y4W6	0.149026	0.0266951	0.593991	0.560122	0.944415	-4.65211
P53597	0.157104	-0.0146574	0.593061	0.56073	0.944415	-4.6522
Q8WW22	0.176283	0.07023	0.592979	0.560784	0.944415	-4.65221
Q9BXK5	0.137482	0.00488505	0.590562	0.562366	0.944415	-4.65244
Q9NZT1	0.345646	-0.0993654	0.589481	0.563075	0.944415	-4.65254
P50991	0.145167	0.0110682	0.589141	0.563298	0.944415	-4.65257
Q53EU6	-0.164582	-0.193719	-0.588327	0.563832	0.944415	-4.65265
Q9NSE4	0.145943	-0.0134236	0.58748	0.564388	0.944415	-4.65273
Q3ZBD7	-0.106699	0.0629154	-0.587233	0.56455	0.944415	-4.65275
P46976	-0.129293	-0.196719	-0.586255	0.565192	0.944415	-4.65285
Q9NYK5	0.16642	-0.00335218	0.585925	0.56541	0.944415	-4.65288
Q96RF0	0.139696	-0.11801	0.585702	0.565556	0.944415	-4.6529
Q8N5M9	0.105917	0.00601622	0.583442	0.567042	0.944415	-4.65311
Q16891	0.129771	-0.00249214	0.582492	0.567668	0.944415	-4.6532
Q99460	0.130559	0.0671442	0.578116	0.570553	0.944415	-4.65361
Q9BSD7	0.111341	0.0550249	0.577936	0.570672	0.944415	-4.65363
Q6ZMU5	0.116456	-0.0160186	0.577111	0.571217	0.944415	-4.6537
P61758	-0.108406	0.00984477	-0.576397	0.571689	0.944415	-4.65377
Q5XKP0	0.159767	-0.047115	0.573924	0.573325	0.944415	-4.654
Q13451	0.123689	-0.0217646	0.573553	0.573571	0.944415	-4.65403
Q10713	0.144154	0.0592034	0.573268	0.57376	0.944415	-4.65406
P55084	0.13456	-0.0562583	0.572708	0.57413	0.944415	-4.65411
Q7L3B6	-0.143183	-0.0889803	-0.572457	0.574296	0.944415	-4.65413
Q86TP1	0.150737	-0.128379	0.571581	0.574877	0.944415	-4.65421
Q96I59	0.142306	0.0620046	0.571478	0.574946	0.944415	-4.65422
Q5MNZ6	0.374533	0.293053	0.570872	0.575347	0.944415	-4.65428
Q02978	0.131778	-0.0490612	0.570605	0.575524	0.944415	-4.6543
Q96L03	0.170686	-0.312329	0.570371	0.575679	0.944415	-4.65433
Q9NTG7	0.133112	0.0347095	0.570156	0.575822	0.944415	-4.65435
O60763	0.122595	0.0301749	0.569544	0.576228	0.944415	-4.6544
Q9BRF8	-0.136853	0.0596316	-0.568646	0.576824	0.944415	-4.65448
P46977	0.138641	-0.00156693	0.567185	0.577794	0.944415	-4.65462
P40925	0.126886	-0.0632049	0.566442	0.578289	0.944415	-4.65469
Q9NPL8	0.140087	-0.114946	0.566161	0.578475	0.944415	-4.65471
P51452	0.104162	-0.114899	0.565847	0.578684	0.944415	-4.65474
Q9BVV7	0.149707	-0.0354029	0.565176	0.579131	0.944415	-4.6548
Q86U28	-0.109551	-0.283056	-0.56494	0.579288	0.944415	-4.65482
Q92878	-0.145579	0.13499	-0.564371	0.579666	0.944415	-4.65488
P61086	0.11074	0.0661936	0.563372	0.580332	0.944415	-4.65497
Q9BZE9	0.178648	-0.0449398	0.558472	0.5836	0.944415	-4.65541
P42765	0.134269	-0.0421747	0.555977	0.585268	0.944415	-4.65563
Q7Z2T5	-0.148784	0.0229749	-0.555005	0.585918	0.944415	-4.65572
Q15599	-0.12082	-0.123773	-0.554902	0.585988	0.944415	-4.65573
P30405	-0.108032	-0.147598	-0.554884	0.586	0.944415	-4.65573
Q8N684	0.125723	-0.198804	0.554472	0.586275	0.944415	-4.65577
Q96CV9	-0.111996	-0.0563306	-0.553996	0.586594	0.944415	-4.65581
P02585	0.192844	-0.135223	0.551951	0.587964	0.944415	-4.65599
Q96T58	-0.118402	-0.0764403	-0.550937	0.588644	0.944415	-4.65609
Q7L0Y3	-0.112867	0.0683181	-0.549884	0.589351	0.944415	-4.65618
Q9NR50	0.153075	0.0882903	0.549368	0.589697	0.944415	-4.65622
P62277	-0.134937	0.0320229	-0.548449	0.590315	0.944415	-4.65631
Q96FJ2	0.106257	-0.0684461	0.54811	0.590543	0.944415	-4.65634
O60925	-0.105426	-0.0756076	-0.545859	0.592056	0.944415	-4.65654
Q96A32	-0.224557	-0.0593107	-0.545727	0.592145	0.944415	-4.65655
Q13445	0.16144	0.175377	0.544791	0.592775	0.944415	-4.65663
P56385	0.140547	-0.0433456	0.544642	0.592875	0.944415	-4.65664
P52895	0.168299	0.171936	0.543811	0.593435	0.944415	-4.65672
Q13867	0.112577	0.0122081	0.542841	0.594089	0.944415	-4.6568
P13798	0.117864	-0.0170517	0.542043	0.594626	0.944415	-4.65687
Q96EY1	0.106531	-0.268477	0.540755	0.595495	0.944415	-4.65698
Q9Y2U8	0.15615	0.143769	0.539848	0.596107	0.944415	-4.65706
P07919	-0.11603	-0.20195	-0.538086	0.597298	0.944415	-4.65722
Q9UII6	-0.127893	-0.128052	-0.537792	0.597496	0.944415	-4.65724
O15347	-0.119505	-0.0573836	-0.536749	0.598201	0.944415	-4.65733
Q5T6F2	0.0959752	-0.136434	0.536118	0.598628	0.944415	-4.65739
O43143	0.110134	-0.0643606	0.535484	0.599058	0.944415	-4.65744
Q13153	0.115633	0.00791231	0.534424	0.599775	0.944415	-4.65754
Q13564	0.14215	0.0247485	0.534078	0.600009	0.944415	-4.65757
O43837	0.131759	0.0810698	0.533246	0.600573	0.944415	-4.65764
O60662	0.129864	0.0613056	0.533187	0.600613	0.944415	-4.65764
O15273	-0.154703	0.0980702	-0.533028	0.60072	0.944415	-4.65766
Q15121	0.152811	0.0030862	0.530883	0.602176	0.944415	-4.65784
Q6UW68	0.122716	0.0673632	0.530389	0.60251	0.944415	-4.65788
Q9P0L0	0.10078	0.00110324	0.530175	0.602655	0.944415	-4.6579
Q96ST2	-0.100826	-0.172724	-0.529267	0.603272	0.944415	-4.65798
Q9Y237	-0.130986	-0.139463	-0.529261	0.603276	0.944415	-4.65798
Q9UBQ5	0.131037	0.0996338	0.528779	0.603604	0.944415	-4.65802
Q14152	0.107706	2.67673e-05	0.528444	0.603831	0.944415	-4.65805
P07203	0.10405	-0.0940681	0.527951	0.604166	0.944415	-4.65809
Q9Y676	0.122273	-0.136353	0.526984	0.604824	0.944415	-4.65818
P63261	0.130548	0.169286	0.52421	0.606711	0.944415	-4.65841
Q8N335	0.128471	-0.0155048	0.523986	0.606864	0.944415	-4.65843
Q9UBQ7	0.129944	0.0892309	0.523102	0.607466	0.944415	-4.65851
Q9UBY9	-0.0914453	-0.143492	-0.522694	0.607744	0.944415	-4.65854
P56181	-0.11093	-0.134448	-0.522678	0.607755	0.944415	-4.65854
Q4G176	0.108574	-0.0303857	0.521468	0.60858	0.944415	-4.65864
P22626	-0.106078	-0.137173	-0.521284	0.608706	0.944415	-4.65866
O60684	0.124142	0.0653882	0.52121	0.608756	0.944415	-4.65867
O95139	0.113293	-0.14798	0.519942	0.609621	0.944415	-4.65877
Q86YZ3	-0.2749	0.274125	-0.518172	0.61083	0.944415	-4.65892
P12270	0.0890328	0.0372988	0.51805	0.610914	0.944415	-4.65893
Q68EM7	0.0930115	0.0596937	0.517748	0.61112	0.944415	-4.65896
P25398	-0.090345	-0.0400459	-0.517147	0.611531	0.944415	-4.65901
P14854	-0.115035	-0.215841	-0.516582	0.611917	0.944415	-4.65906
P62993	-0.104466	-0.161893	-0.514965	0.613023	0.944415	-4.65919
Q14257	0.107382	0.0649631	0.513818	0.613808	0.944415	-4.65929
P56381	-0.0958391	-0.12892	-0.513196	0.614234	0.944415	-4.65934
Q8N1G4	-0.0948949	0.0239533	-0.511561	0.615355	0.944415	-4.65947
Q15075	0.0879488	0.0425373	0.511509	0.61539	0.944415	-4.65948
Q9NVI7	0.100363	-0.0286343	0.510372	0.61617	0.944415	-4.65957
P22061	0.100879	0.0657498	0.509142	0.617014	0.944415	-4.65967
Q96HY6	0.102981	0.162061	0.509074	0.617061	0.944415	-4.65968
Q9H7C4	0.102498	0.0689475	0.507092	0.618422	0.944415	-4.65984
P30622	-0.0923857	-0.0845707	-0.506741	0.618664	0.944415	-4.65987
Q9NP98	0.328835	0.197444	0.506638	0.618735	0.944415	-4.65988
Q13200	0.112889	0.10187	0.505401	0.619585	0.944415	-4.65998
Q9UHY7	0.112147	-0.00376372	0.504945	0.619899	0.944415	-4.66002
Q15843	-0.0929135	-0.0664139	-0.504431	0.620253	0.944415	-4.66006
Q9UBT2	0.108375	0.11785	0.503084	0.62118	0.944809	-4.66017
Q9BYT8	0.132988	0.191879	0.500534	0.622937	0.946463	-4.66038
Q15819	0.0988576	-0.0937249	0.498419	0.624397	0.946934	-4.66055
Q9UKS6	-0.101927	-0.00672872	-0.495518	0.626401	0.946934	-4.66079
P55735	0.116932	0.0505922	0.492073	0.628785	0.946934	-4.66106
Q99623	0.114724	-0.0185894	0.492072	0.628786	0.946934	-4.66106
P17540	0.123562	-0.0690538	0.491666	0.629067	0.946934	-4.6611
O43504	-0.118255	-0.235335	-0.491561	0.62914	0.946934	-4.6611
O00764	0.0923048	0.0546124	0.491349	0.629287	0.946934	-4.66112
P82673	-0.115417	-0.0579651	-0.490947	0.629566	0.946934	-4.66115
A0A384ME17	0.122261	0.00838479	0.489958	0.630251	0.946934	-4.66123
O75489	0.0979644	-0.0370945	0.48967	0.630451	0.946934	-4.66126
P23368	0.126151	0.177382	0.48725	0.632131	0.946934	-4.66145
P98160	-0.0858755	-0.0273018	-0.487093	0.63224	0.946934	-4.66146
O14874	-0.105711	0.0782781	-0.486289	0.632798	0.946934	-4.66152
P48556	0.120796	0.0920643	0.485836	0.633113	0.946934	-4.66156
Q15257	0.125114	0.0362003	0.485013	0.633685	0.946934	-4.66162
Q8IVD9	0.0924343	0.0558817	0.482094	0.635715	0.946934	-4.66185
Q96PU8	0.0984166	-0.0188538	0.481801	0.635919	0.946934	-4.66188
Q9H0U3	0.0839831	-0.00506951	0.475369	0.640405	0.946934	-4.66238
Q13423	0.123376	-0.00753051	0.474835	0.640778	0.946934	-4.66242
Q8NEZ2	0.103154	-0.0266588	0.474193	0.641227	0.946934	-4.66247
P55145	0.114938	-0.0581257	0.472739	0.642244	0.946934	-4.66258
Q9UMS0	-0.0986244	-0.130599	-0.472143	0.642661	0.946934	-4.66263
O60669	-0.114611	-0.0311312	-0.472064	0.642716	0.946934	-4.66263
Q9NVV4	0.101344	0.0913801	0.4719	0.642831	0.946934	-4.66265
O43716	-0.113989	-0.0642612	-0.471482	0.643123	0.946934	-4.66268
P82933	-0.105686	0.00896393	-0.470982	0.643473	0.946934	-4.66272
Q15714	-0.106345	-0.108793	-0.46922	0.644707	0.946934	-4.66285
P35080	-0.0946867	-0.0467763	-0.467949	0.645598	0.946934	-4.66295
Q16186	0.115088	0.109678	0.467706	0.645768	0.946934	-4.66297
Q9NX47	0.134548	0.0781794	0.46717	0.646145	0.946934	-4.66301
P30048	0.093306	0.0351897	0.466978	0.646279	0.946934	-4.66302
O75436	0.15684	0.0502402	0.466878	0.646349	0.946934	-4.66303
O75964	0.125485	-0.0413341	0.466742	0.646444	0.946934	-4.66304
Q9NPY3	-0.102463	-0.0199565	-0.464879	0.647752	0.946934	-4.66318
P24311	0.116619	-0.0149259	0.464707	0.647873	0.946934	-4.6632
Q9NZJ6	0.11754	-0.00232206	0.464237	0.648203	0.946934	-4.66323
Q9BU61	0.103648	0.011449	0.464026	0.648351	0.946934	-4.66325
A6NK59	0.100859	-0.114947	0.46351	0.648714	0.946934	-4.66329
P26641	0.117975	0.0873088	0.462219	0.649621	0.94728	-4.66338
Q9NTK5	0.105985	0.0786144	0.455626	0.654264	0.948752	-4.66388
O14561	-0.094648	-0.227498	-0.454431	0.655107	0.948752	-4.66397
P20290	-0.0839463	0.0318849	-0.453159	0.656005	0.948752	-4.66406
Q5VSY0	0.0999038	-0.21547	0.45222	0.656668	0.948752	-4.66413
Q9BTZ2	0.119523	0.0447287	0.452062	0.656779	0.948752	-4.66414
Q9BY43	-0.0874651	-0.00407731	-0.448206	0.659506	0.948752	-4.66443
P81605	0.173212	-0.175649	0.447535	0.659981	0.948752	-4.66447
P50402	0.0839005	-0.0721008	0.447491	0.660012	0.948752	-4.66448
Q00325	0.116039	0.031595	0.446039	0.66104	0.948752	-4.66458
P41227	0.0955178	0.0985803	0.445216	0.661624	0.948752	-4.66464
Q8N0U8	0.110782	0.0989869	0.441402	0.664329	0.948752	-4.66492
Q6PI48	0.0865017	-0.055832	0.440818	0.664744	0.948752	-4.66496
Q8NFU3	0.0876995	-0.00300211	0.44031	0.665105	0.948752	-4.665
P48163	0.110021	0.0603937	0.440149	0.665219	0.948752	-4.66501
Q04323	0.0865778	-0.146437	0.440045	0.665293	0.948752	-4.66502
Q13825	-0.096145	-0.0424089	-0.439265	0.665847	0.948752	-4.66507
Q96K17	-0.08533	-0.0816423	-0.439068	0.665987	0.948752	-4.66509
P00441	-0.103605	-0.14174	-0.438061	0.666703	0.948752	-4.66516
O95167	0.113802	-0.0129646	0.437402	0.667172	0.948752	-4.66521
Q9UNF0	0.0894205	-0.153146	0.436817	0.667588	0.948752	-4.66525
Q6ZVM7	0.0908435	-0.113482	0.433986	0.669604	0.948752	-4.66545
P62072	-0.0877034	-0.118036	-0.433891	0.669671	0.948752	-4.66546
O60506	-0.0813526	-0.122253	-0.433798	0.669737	0.948752	-4.66546
Q15365	0.0857881	0.093621	0.433763	0.669762	0.948752	-4.66547
Q9UNN5	0.088339	0.00498913	0.432257	0.670836	0.948752	-4.66557
B0YJ81	0.0985568	0.0412312	0.427694	0.674093	0.948752	-4.66589
P82914	-0.0824193	-0.01749	-0.427686	0.674098	0.948752	-4.6659
P41236	-0.0912692	-0.0265691	-0.42599	0.67531	0.948752	-4.66601
Q15293	0.0989849	-0.00533842	0.425675	0.675535	0.948752	-4.66604
P28838	0.0818143	-0.0212022	0.42529	0.675811	0.948752	-4.66606
Q6PCB7	0.104777	-0.0410804	0.424415	0.676437	0.948752	-4.66612
P05166	0.132703	0.0391867	0.42253	0.677786	0.948752	-4.66625
O60343	-0.107084	0.110199	-0.421486	0.678534	0.948752	-4.66633
Q9BQS8	0.0946546	-0.0136991	0.421266	0.678691	0.948752	-4.66634
Q9HCU5	0.102718	0.00505549	0.42121	0.678731	0.948752	-4.66635
Q9P032	-0.0893547	0.0416057	-0.419832	0.679719	0.948752	-4.66644
Q8NB12	0.103881	0.0712121	0.415464	0.682854	0.948752	-4.66674
P54646	0.0944592	0.0371736	0.413638	0.684166	0.948752	-4.66686
Q86UT6	0.105164	-0.0102366	0.413605	0.684189	0.948752	-4.66687
P23396	0.0887268	-0.0412325	0.413428	0.684317	0.948752	-4.66688
O43633	-0.0898748	-0.0237343	-0.413131	0.68453	0.948752	-4.6669
Q5T0F9	0.0780639	-0.126446	0.412671	0.684861	0.948752	-4.66693
Q9GZT3	-0.0727312	-0.0326889	-0.412052	0.685306	0.948752	-4.66697
Q7Z2K6	0.0941577	-0.100268	0.411097	0.685994	0.948752	-4.66704
P55789	-0.0741191	-0.0952779	-0.410592	0.686357	0.948752	-4.66707
O14880	0.0913771	0.00632805	0.409276	0.687304	0.948752	-4.66716
A4UGR9	-0.0950567	-0.0603992	-0.406751	0.689124	0.948752	-4.66733
Q9UHV9	-0.0796594	-0.0338568	-0.406283	0.689461	0.948752	-4.66736
P17152	0.0946462	-0.0406216	0.405965	0.689691	0.948752	-4.66738
Q9H2W6	-0.0855197	0.0697205	-0.405897	0.68974	0.948752	-4.66738
Q96GK7	0.12677	0.0656909	0.405567	0.689978	0.948752	-4.66741
Q9UBW8	0.100087	0.128882	0.405265	0.690196	0.948752	-4.66743
Q9UIJ7	0.0933612	-0.109736	0.404765	0.690557	0.948752	-4.66746
Q9Y262	-0.105173	0.00365184	-0.401329	0.693038	0.948752	-4.66769
P05165	0.111075	-0.013695	0.400814	0.69341	0.948752	-4.66772
Q9UKV8	0.0744292	0.075984	0.398482	0.695097	0.948752	-4.66787
P54727	-0.0817415	-0.0918062	-0.398386	0.695166	0.948752	-4.66788
P51610	0.0728047	0.0196153	0.398147	0.695339	0.948752	-4.66789
Q9Y6M9	0.0880145	-0.114626	0.398123	0.695356	0.948752	-4.6679
Q96K76	0.0912078	0.0522257	0.398013	0.695436	0.948752	-4.6679
P38117	0.09278	-0.115736	0.397946	0.695484	0.948752	-4.66791
P14324	0.0827498	0.00197157	0.397682	0.695676	0.948752	-4.66793
Q10471	-0.0945561	0.0560794	-0.396707	0.696381	0.948752	-4.66799
Q8NBX0	0.109571	-0.0417082	0.396148	0.696786	0.948752	-4.66802
Q8IZH2	0.0954896	-0.0456722	0.396009	0.696887	0.948752	-4.66803
Q13098	0.100278	0.0793522	0.394792	0.697768	0.948752	-4.66811
Q9BTV4	0.086404	0.238644	0.394162	0.698225	0.948752	-4.66815
O95202	0.0852918	-0.0196019	0.393391	0.698783	0.948752	-4.6682
Q8TCS8	0.0823912	0.000507136	0.392942	0.699109	0.948752	-4.66823
Q5BJF2	0.104309	-0.0166842	0.392391	0.699509	0.948752	-4.66827
Q9NVT9	0.107947	0.1633	0.390723	0.700719	0.948752	-4.66838
P31937	0.086685	-0.0653319	0.390329	0.701005	0.948752	-4.6684
O00399	-0.104375	0.0698419	-0.387861	0.702798	0.948752	-4.66856
P56545	0.0988067	-0.156464	0.387507	0.703055	0.948752	-4.66858
P52179	0.0694207	-0.019114	0.386489	0.703795	0.948752	-4.66865
Q9Y3E7	0.0638724	-0.0844488	0.386047	0.704117	0.948752	-4.66867
P13073	0.0838702	-0.0688059	0.385888	0.704232	0.948752	-4.66868
Q32MZ4	-0.0755579	-0.0243812	-0.385319	0.704646	0.948752	-4.66872
O43598	-0.123106	0.18552	-0.384903	0.704949	0.948752	-4.66875
Q96G03	0.0845688	0.115804	0.384563	0.705196	0.948752	-4.66877
Q9Y282	0.101539	0.0443117	0.383777	0.705768	0.948752	-4.66882
O00186	0.095459	0.150437	0.383685	0.705835	0.948752	-4.66882
P07108	-0.0752632	-0.198881	-0.382964	0.70636	0.948752	-4.66887
Q7Z406	-0.0639208	-0.0811993	-0.378431	0.709663	0.949117	-4.66915
Q06124	0.0841154	0.00251066	0.377897	0.710053	0.949117	-4.66919
P20674	-0.0972952	-0.190414	-0.377245	0.710529	0.949117	-4.66923
Q96HY7	-0.085049	-0.0237251	-0.376741	0.710897	0.949117	-4.66926
P05496	0.0985034	0.0426243	0.375895	0.711514	0.949117	-4.66931
Q15393	0.0820939	-0.0598415	0.37572	0.711642	0.949117	-4.66932
Q9NS69	0.0863522	0.153961	0.37467	0.712409	0.949117	-4.66938
P49247	-0.0674322	-0.200933	-0.374171	0.712774	0.949117	-4.66942
O60869	-0.0811186	-0.150699	-0.37364	0.713162	0.949117	-4.66945
P49748	0.0963568	0.019754	0.372815	0.713765	0.949117	-4.6695
A2RTX5	0.0685265	0.134366	0.36921	0.716402	0.949117	-4.66972
O14950	0.0845535	-0.0285462	0.368297	0.717071	0.949117	-4.66977
I3L0A0	0.0735538	-0.0188985	0.368278	0.717085	0.949117	-4.66978
Q702N8	-0.0965195	-0.0829029	-0.367929	0.71734	0.949117	-4.6698
Q9Y6W3	-0.0955364	0.0836246	-0.367363	0.717755	0.949117	-4.66983
O14737	-0.0754875	-0.114564	-0.366446	0.718426	0.949117	-4.66989
Q9UMR2	0.0848939	-0.144769	0.365795	0.718903	0.949117	-4.66993
P48507	0.117909	-0.0298817	0.365296	0.719269	0.949117	-4.66996
Q02750	0.105254	0.0898633	0.364105	0.720143	0.949117	-4.67003
P61081	0.0884111	0.0667102	0.357683	0.72486	0.949117	-4.67041
Q9BTM1	0.37862	-0.299158	0.35767	0.724869	0.949117	-4.67041
O76074	-0.113169	0.0927507	-0.356967	0.725386	0.949117	-4.67045
P55039	0.0771547	-0.028645	0.35694	0.725406	0.949117	-4.67045
Q02338	-0.0962664	-0.0344473	-0.354896	0.72691	0.949117	-4.67057
P32456	0.0897535	0.0937395	0.354824	0.726963	0.949117	-4.67058
Q9HAV7	0.0664475	-0.0779721	0.354277	0.727365	0.949117	-4.67061
O95425	0.0700351	-0.0790387	0.353799	0.727718	0.949117	-4.67064
P42167	-0.0748905	-0.172423	-0.353429	0.72799	0.949117	-4.67066
Q9H9J2	0.0732925	-0.00114572	0.3532	0.728159	0.949117	-4.67067
Q9Y508	-0.0698005	0.00162684	-0.352985	0.728317	0.949117	-4.67068
O43169	0.0716391	-0.0879079	0.35242	0.728734	0.949117	-4.67072
Q8NI60	0.0811873	-0.104831	0.352168	0.728919	0.949117	-4.67073
P36957	-0.0725632	-0.227268	-0.35183	0.729168	0.949117	-4.67075
P47985	0.0769006	-0.0688027	0.351339	0.72953	0.949117	-4.67078
Q6FI81	0.065097	0.0985843	0.349829	0.730643	0.949117	-4.67087
P51398	-0.071522	0.000392873	-0.346847	0.732843	0.949117	-4.67104
Q96EY7	-0.074047	0.00290568	-0.34628	0.733262	0.949117	-4.67107
Q9Y383	-0.06203	-0.101387	-0.345816	0.733604	0.949117	-4.6711
O75764	-0.0818749	0.00779539	-0.345361	0.733941	0.949117	-4.67112
P31040	0.0803989	-0.0239113	0.345291	0.733992	0.949117	-4.67113
P02647	0.108855	0.149192	0.345048	0.734172	0.949117	-4.67114
P56199	0.0774861	-0.0234671	0.342081	0.736365	0.951082	-4.67131
O75306	0.0872085	-0.0190927	0.339902	0.737977	0.951636	-4.67143
O75323	0.0778957	0.0340302	0.339681	0.738141	0.951636	-4.67144
O95166	-0.070113	0.00804137	-0.336938	0.740172	0.953385	-4.6716
P30533	-0.0732045	-0.140402	-0.332264	0.743638	0.956977	-4.67185
Q86YM7	0.0637489	-0.0776444	0.330915	0.744639	0.957393	-4.67193
Q9BUR5	0.0962293	0.0527386	0.329582	0.745629	0.957795	-4.672
Q8IYS1	0.0923327	-0.0687896	0.326282	0.748082	0.960072	-4.67218
Q96RP9	0.0731396	-0.0031335	0.324638	0.749305	0.96077	-4.67227
Q7Z7B0	0.0558794	-0.0729642	0.319373	0.753226	0.963853	-4.67255
O95298	0.0689202	-0.0636155	0.317671	0.754495	0.963853	-4.67264
Q7L2H7	0.0845982	0.0333144	0.317124	0.754903	0.963853	-4.67266
Q08623	0.0611444	-0.0498045	0.316276	0.755535	0.963853	-4.67271
Q14324	0.124649	0.103085	0.315753	0.755926	0.963853	-4.67274
Q96GC5	0.059276	-0.0159725	0.314417	0.756923	0.963853	-4.67281
P55042	0.0955634	0.137345	0.313698	0.75746	0.963853	-4.67284
Q13326	0.0799519	0.0695716	0.313329	0.757736	0.963853	-4.67286
O75380	-0.0750039	-0.223855	-0.313178	0.757849	0.963853	-4.67287
P35270	0.0732975	0.0496952	0.308601	0.76127	0.966471	-4.6731
Q9H9P8	0.078727	-0.0575386	0.308185	0.761581	0.966471	-4.67313
P25789	0.0581372	-0.142581	0.307552	0.762055	0.966471	-4.67316
Q86XP3	0.0765347	0.112675	0.306277	0.763009	0.966471	-4.67322
Q5JTV8	0.073976	0.191316	0.305672	0.763462	0.966471	-4.67325
O00483	0.0755802	-0.0510559	0.304614	0.764254	0.966471	-4.67331
Q8IVM0	0.0710456	0.0536618	0.303264	0.765265	0.966471	-4.67337
P02042	0.129566	0.183442	0.302746	0.765654	0.966471	-4.6734
O00571	0.06099	-0.0218411	0.301993	0.766218	0.966471	-4.67344
P62316	0.0615123	-0.0783044	0.301287	0.766748	0.966471	-4.67347
P13647	0.152483	0.332014	0.297872	0.76931	0.967563	-4.67364
Q14258	0.0556206	0.00474606	0.297451	0.769625	0.967563	-4.67366
P25786	-0.053076	-0.0917019	-0.297073	0.76991	0.967563	-4.67368
O43678	-0.0602709	-0.211273	-0.296482	0.770353	0.967563	-4.67371
Q13435	-0.0564433	-0.168592	-0.292511	0.773337	0.969113	-4.6739
P32969	-0.0630062	0.0153993	-0.291784	0.773884	0.969113	-4.67394
Q8WYP5	0.0837038	-0.00441338	0.290619	0.77476	0.969113	-4.674
P62070	0.0748463	0.0355457	0.289197	0.77583	0.969113	-4.67406
O00763	-0.0511108	-0.0541336	-0.288595	0.776283	0.969113	-4.67409
Q13011	-0.0577434	-0.118066	-0.287948	0.77677	0.969113	-4.67412
Q9P281	-0.0738273	0.0134144	-0.287866	0.776832	0.969113	-4.67413
Q9Y263	0.0565675	-0.0253889	0.286953	0.777519	0.969113	-4.67417
O43852	-0.0548874	-0.026504	-0.286634	0.777759	0.969113	-4.67419
Q13522	-0.0642878	-0.195878	-0.282462	0.780904	0.972174	-4.67438
P02654	0.0973787	0.163903	0.280985	0.782018	0.972704	-4.67445
Q9Y2Z9	0.08319	-0.0878539	0.276649	0.785292	0.9728	-4.67465
P36405	0.0467596	-0.0278143	0.275926	0.785838	0.9728	-4.67468
P24539	0.0794055	0.0394061	0.275135	0.786436	0.9728	-4.67472
O95810	0.0575055	-0.117835	0.275037	0.78651	0.9728	-4.67472
Q92523	-0.0555323	-0.129612	-0.274992	0.786544	0.9728	-4.67473
P61247	0.0518809	-0.0260213	0.273754	0.78748	0.9728	-4.67478
P21912	0.0641733	-0.0640038	0.273738	0.787492	0.9728	-4.67478
Q9P013	0.0525992	-0.0552775	0.273591	0.787603	0.9728	-4.67479
O43399	-0.0493392	-0.0367219	-0.268362	0.79156	0.97387	-4.67502
Q96H20	-0.0853951	0.136891	-0.266781	0.792757	0.97387	-4.67509
Q93034	0.0534462	0.00974758	0.266734	0.792792	0.97387	-4.6751
P46779	0.0501327	0.0666907	0.266626	0.792874	0.97387	-4.6751
Q8WZA9	0.0765917	0.163497	0.266548	0.792933	0.97387	-4.67511
Q96PE7	-0.0571632	0.0102262	-0.265951	0.793386	0.97387	-4.67513
P35241	0.0514721	-0.0800488	0.265644	0.793619	0.97387	-4.67514
Q49B96	-0.0692361	-0.234968	-0.265163	0.793983	0.97387	-4.67517
Q8TCC3	0.0559168	0.0666899	0.262826	0.795755	0.974976	-4.67527
Q8NBF2	0.059067	0.130462	0.261651	0.796646	0.974976	-4.67532
Q03252	0.0646363	-0.0161733	0.261244	0.796955	0.974976	-4.67534
O00330	0.0522029	-0.0694188	0.259767	0.798076	0.975371	-4.6754
Q9NR19	0.0563975	0.0897801	0.258259	0.799221	0.975371	-4.67547
Q02252	0.0605671	-0.0668457	0.257196	0.800028	0.975371	-4.67551
Q8IYU8	0.0568296	0.0255056	0.257182	0.800039	0.975371	-4.67551
Q6FIE9	-0.0518609	-0.0458501	-0.252122	0.803885	0.977398	-4.67572
Q14894	0.0848591	-0.223029	0.250682	0.804981	0.977398	-4.67578
P30626	0.0432659	0.0724705	0.25003	0.805476	0.977398	-4.67581
Q92945	0.0477853	-0.0566309	0.249217	0.806095	0.977398	-4.67585
Q13424	0.0498403	-0.0280144	0.249041	0.806229	0.977398	-4.67585
P00747	0.0758056	0.185321	0.247215	0.80762	0.977398	-4.67593
P04040	0.0670468	0.0339516	0.24656	0.808119	0.977398	-4.67595
P52272	-0.081137	-0.222536	-0.246091	0.808476	0.977398	-4.67597
P51991	-0.069731	-0.0994873	-0.245827	0.808677	0.977398	-4.67598
Q99497	0.043893	-0.0493822	0.24485	0.809421	0.977398	-4.67602
Q9P0P0	-0.0517114	-0.159752	-0.244093	0.809998	0.977398	-4.67606
Q9NP74	-0.0467734	-0.145182	-0.244088	0.810002	0.977398	-4.67606
Q9HD42	0.0437446	-0.262484	0.241152	0.812241	0.979263	-4.67617
Q13574	0.0492864	-0.0105048	0.23892	0.813944	0.979761	-4.67626
O95218	-0.0485303	-0.0161323	-0.238793	0.814041	0.979761	-4.67627
Q8N5M1	0.068653	-0.0376072	0.235913	0.81624	0.981572	-4.67638
O75475	0.0593225	-0.184773	0.233358	0.818192	0.982264	-4.67648
O43639	-0.0596367	-0.116527	-0.232804	0.818615	0.982264	-4.6765
Q8NE62	0.0596782	-0.0301114	0.230731	0.820201	0.982264	-4.67658
Q549N0	-0.0409908	-0.0971949	-0.230688	0.820233	0.982264	-4.67658
P52815	0.0442812	0.0139132	0.230613	0.820291	0.982264	-4.67659
O95989	0.0584743	0.210466	0.227588	0.822605	0.983249	-4.6767
P84243	-0.152205	0.137567	-0.227497	0.822675	0.983249	-4.6767
P36954	0.0514792	-0.0799546	0.226255	0.823625	0.983249	-4.67675
P15924	0.0978495	0.206999	0.2259	0.823897	0.983249	-4.67676
P13671	-0.0647195	0.145253	-0.222956	0.826153	0.983848	-4.67687
Q8TAE8	0.0467519	-0.0188441	0.222689	0.826357	0.983848	-4.67688
P17174	0.0435225	-0.131595	0.221843	0.827005	0.983848	-4.67692
O60884	0.0412299	0.0192236	0.221334	0.827395	0.983848	-4.67693
O00505	0.0542111	0.0618017	0.219762	0.8286	0.983848	-4.67699
O14958	0.0512545	-0.0621306	0.216378	0.831196	0.983848	-4.67711
P24752	0.0463857	-0.108105	0.215422	0.83193	0.983848	-4.67715
P25788	-0.0383855	-0.0919335	-0.215132	0.832153	0.983848	-4.67716
P31942	-0.0468088	-0.11113	-0.214505	0.832634	0.983848	-4.67718
Q6PGP7	-0.0461782	0.00931675	-0.212238	0.834375	0.983848	-4.67726
P34897	0.0557823	0.0792549	0.212191	0.83441	0.983848	-4.67726
O60832	-0.0635792	0.0753669	-0.209898	0.836173	0.983848	-4.67734
P25705	0.0514713	-0.0476838	0.209844	0.836214	0.983848	-4.67735
P43155	-0.0436146	-0.0453753	-0.209517	0.836465	0.983848	-4.67736
Q92890	0.0443918	-0.00251704	0.206238	0.838986	0.983848	-4.67747
Q9HC36	-0.0471818	0.0863313	-0.20596	0.8392	0.983848	-4.67748
Q15370	-0.0416882	0.0574303	-0.205845	0.839288	0.983848	-4.67748
Q9P035	0.0691795	-0.198217	0.204372	0.840422	0.983848	-4.67753
P62304	0.0423009	-0.0493672	0.2043	0.840477	0.983848	-4.67754
O60784	-0.0385642	-0.0275062	-0.203773	0.840882	0.983848	-4.67755
P49356	0.0700542	0.11286	0.20271	0.8417	0.983848	-4.67759
P02549	-0.0868236	0.076596	-0.201856	0.842358	0.983848	-4.67762
P62318	0.0380097	-0.0961738	0.200115	0.843698	0.983848	-4.67768
Q10567	0.0603853	0.0511014	0.199147	0.844444	0.983848	-4.67771
P48788	0.075223	-0.00753357	0.199142	0.844448	0.983848	-4.67771
Q92665	-0.0420494	-0.0703124	-0.198911	0.844626	0.983848	-4.67772
O60888	-0.0380064	-0.0933863	-0.198024	0.845309	0.983848	-4.67775
Q05086	0.0425411	0.06353	0.19557	0.847201	0.983848	-4.67783
Q13643	0.0354451	-0.190391	0.194581	0.847963	0.983848	-4.67786
P62253	0.0420266	0.0498556	0.194517	0.848012	0.983848	-4.67786
P60866	0.0455037	-0.0650962	0.194346	0.848144	0.983848	-4.67787
P20618	-0.0370045	-0.121525	-0.194297	0.848181	0.983848	-4.67787
P35232	0.0560575	-0.0285911	0.193811	0.848556	0.983848	-4.67788
Q7L775	0.0499228	0.134052	0.193228	0.849006	0.983848	-4.6779
P43897	-0.0488078	-0.0259084	-0.19075	0.850917	0.983848	-4.67798
O14929	-0.0545272	0.140693	-0.190084	0.851432	0.983848	-4.678
Q96CM8	0.0441652	-0.00118701	0.187519	0.853412	0.983848	-4.67808
Q8N163	-0.0347983	0.0123593	-0.187469	0.85345	0.983848	-4.67808
Q16586	-0.0309811	-0.0786238	-0.186895	0.853893	0.983848	-4.6781
P54296	0.0539156	-0.0263257	0.186829	0.853944	0.983848	-4.6781
Q9UK41	-0.0387419	0.0647098	-0.186332	0.854328	0.983848	-4.67812
O15173	0.0417748	0.12591	0.185688	0.854825	0.983848	-4.67814
Q9NVH6	0.0344696	0.0254537	0.185044	0.855323	0.983848	-4.67816
Q96T66	0.0405694	-0.084341	0.184116	0.85604	0.983848	-4.67819
P35527	0.115868	0.3303	0.182468	0.857313	0.983848	-4.67824
Q5U5X0	0.0469485	-0.0475076	0.181612	0.857975	0.983848	-4.67826
P49903	0.0444154	-0.142118	0.18145	0.8581	0.983848	-4.67827
Q9BZE1	0.0424434	0.117993	0.177762	0.860952	0.983848	-4.67838
Q8WTS6	0.0344169	0.0191852	0.177585	0.861089	0.983848	-4.67838
Q9NTJ4	0.0376262	-0.0743959	0.177568	0.861102	0.983848	-4.67838
P0CF74	0.0565384	0.280166	0.176786	0.861707	0.983848	-4.67841
Q9Y2W1	-0.0338506	-0.161258	-0.176432	0.861981	0.983848	-4.67842
O15382	0.04213	0.0650667	0.176106	0.862233	0.983848	-4.67843
Q9Y5M8	-0.0471667	0.114481	-0.174971	0.863112	0.983848	-4.67846
Q9Y6C9	-0.0418081	0.101572	-0.174662	0.863351	0.983848	-4.67847
O95169	0.0331242	-0.157841	0.17461	0.863391	0.983848	-4.67847
Q9Y5Z4	-0.035556	-0.0878316	-0.170821	0.866324	0.984504	-4.67858
P29536	-0.0446916	-0.0730381	-0.170669	0.866443	0.984504	-4.67858
Q9Y3D6	0.0383669	0.0164141	0.169852	0.867075	0.984504	-4.67861
P55036	0.0281747	-0.00248118	0.169315	0.867491	0.984504	-4.67862
Q13619	0.0379283	0.097059	0.168371	0.868223	0.984504	-4.67865
Q12904	0.037011	-0.0247721	0.167662	0.868772	0.984504	-4.67867
P46063	0.0315271	0.0857533	0.165417	0.870512	0.984504	-4.67873
Q96ND0	0.0502326	0.00266888	0.164993	0.870841	0.984504	-4.67874
Q9ULP9	0.0390921	0.000950004	0.164122	0.871517	0.984504	-4.67877
Q9NRD1	-0.0412185	-0.0730363	-0.163981	0.871626	0.984504	-4.67877
Q96AG3	-0.0343649	0.0185295	-0.163974	0.871631	0.984504	-4.67877
Q6IBS0	-0.0301704	0.0102817	-0.163025	0.872367	0.984549	-4.6788
P05976	-0.0508314	-0.150363	-0.160297	0.874483	0.985364	-4.67887
Q9P2W9	-0.0374378	0.0786699	-0.159386	0.87519	0.985364	-4.67889
P31930	0.0334147	-0.0942611	0.158433	0.87593	0.985364	-4.67892
O75937	-0.0450386	-0.121333	-0.158155	0.876146	0.985364	-4.67893
P61981	0.0303911	0.0198132	0.156984	0.877055	0.985364	-4.67896
Q9H444	-0.0305505	-0.0448163	-0.156702	0.877274	0.985364	-4.67896
P26196	0.0283797	0.051286	0.15449	0.878992	0.986178	-4.67902
Q9UKU7	-0.0355678	0.0329303	-0.152016	0.880913	0.986178	-4.67908
P23297	0.0307904	0.107472	0.151644	0.881203	0.986178	-4.67909
O14841	-0.0320701	0.0460751	-0.150686	0.881947	0.986178	-4.67912
P35609	-0.0672665	0.226094	-0.144252	0.88695	0.986178	-4.67928
Q9NQY0	0.03242	0.234432	0.143957	0.88718	0.986178	-4.67928
Q05639	0.0307675	0.172072	0.142554	0.888271	0.986178	-4.67932
P23786	-0.0338713	-0.0109022	-0.142055	0.88866	0.986178	-4.67933
O60706	-0.0323414	0.0385853	-0.141502	0.88909	0.986178	-4.67934
Q8TCD5	0.0328924	0.00492289	0.139916	0.890324	0.986178	-4.67938
P62256	-0.0452344	0.153635	-0.139826	0.890395	0.986178	-4.67938
P60520	0.0292015	-0.039458	0.138895	0.89112	0.986178	-4.6794
P00738	-0.0561453	0.18849	-0.137631	0.892104	0.986178	-4.67943
O00116	0.038199	-0.0686945	0.136694	0.892833	0.986178	-4.67945
Q08495	0.0417649	-0.132263	0.135767	0.893556	0.986178	-4.67947
Q13203	0.0578892	0.317933	0.135449	0.893803	0.986178	-4.67948
Q9Y5A7	0.0312551	0.136647	0.134091	0.894861	0.986178	-4.67951
P27338	0.0330588	-0.0072843	0.132614	0.896012	0.986178	-4.67954
Q9NXR7	0.0459131	0.117297	0.132571	0.896045	0.986178	-4.67955
Q96S66	0.0241226	-0.00292998	0.13234	0.896226	0.986178	-4.67955
P49792	-0.0237569	-0.0672339	-0.131898	0.89657	0.986178	-4.67956
Q96HC4	-0.0334534	-0.115444	-0.131766	0.896673	0.986178	-4.67956
Q16775	-0.0242989	0.0282622	-0.128088	0.899541	0.986178	-4.67964
Q8N465	0.0325171	0.0137326	0.127337	0.900126	0.986178	-4.67966
Q00G26	0.0272742	-0.210566	0.127219	0.900218	0.986178	-4.67966
P53778	0.0273249	0.12318	0.126931	0.900443	0.986178	-4.67967
O14832	0.029093	-0.0391844	0.125586	0.901492	0.986178	-4.6797
P29692	-0.0263215	-0.0441771	-0.12515	0.901832	0.986178	-4.6797
Q01105	-0.0255199	-0.0532714	-0.124548	0.902302	0.986178	-4.67972
P50502	0.0215872	-0.128238	0.124472	0.902361	0.986178	-4.67972
Q68J44	-0.0235247	-0.063576	-0.124231	0.902549	0.986178	-4.67972
Q9BRP8	-0.0272595	-0.119451	-0.124041	0.902697	0.986178	-4.67973
Q6UXV4	0.0293134	-0.126727	0.122966	0.903536	0.986178	-4.67975
Q8NI37	-0.0212195	-0.158444	-0.122526	0.903879	0.986178	-4.67976
Q16851	0.0340397	0.0454763	0.121647	0.904565	0.986178	-4.67978
P46783	-0.0215026	-0.0107111	-0.121176	0.904933	0.986178	-4.67979
P55809	-0.0313885	0.0501442	-0.118686	0.906876	0.986178	-4.67984
O14548	-0.0306143	0.00252765	-0.118399	0.9071	0.986178	-4.67984
O00217	-0.023185	-0.138225	-0.117611	0.907716	0.986178	-4.67986
P30049	-0.0239828	-0.053497	-0.117427	0.90786	0.986178	-4.67986
Q15056	0.0283932	-0.179929	0.11608	0.908911	0.986178	-4.67989
Q9NX46	-0.0215328	0.0645965	-0.115203	0.909596	0.986178	-4.6799
Q15438	-0.0280876	-0.0939838	-0.113432	0.91098	0.986178	-4.67994
Q9Y3D2	-0.0227552	-0.180438	-0.113182	0.911175	0.986178	-4.67994
P51116	0.0227273	-0.1229	0.113046	0.911281	0.986178	-4.67995
Q9UKV3	0.0243805	-0.041987	0.111902	0.912175	0.986178	-4.67997
O60825	-0.0309135	-0.172109	-0.111873	0.912198	0.986178	-4.67997
P30044	-0.0212589	-0.00525272	-0.111314	0.912635	0.986178	-4.67998
Q9Y680	0.0379703	-0.0429594	0.110347	0.91339	0.986178	-4.68
P36959	0.0222482	0.0622838	0.110282	0.913441	0.986178	-4.68
P26373	0.0225301	-0.0961734	0.110088	0.913593	0.986178	-4.68
P61956	-0.0213782	-0.0522047	-0.105215	0.917402	0.988237	-4.68009
Q9BYV2	0.0207854	0.020987	0.10519	0.917422	0.988237	-4.68009
Q99757	0.0215267	-0.0916993	0.104001	0.918351	0.988237	-4.68011
Q9NTM9	-0.0189559	-0.0430937	-0.103786	0.91852	0.988237	-4.68011
O00244	0.0198639	-0.114943	0.102507	0.91952	0.988237	-4.68013
Q9H2H8	0.0304685	-0.0134582	0.101115	0.920609	0.988237	-4.68016
P62136	-0.0298505	0.0549843	-0.100762	0.920885	0.988237	-4.68016
O96000	0.0277798	-0.528265	0.100493	0.921096	0.988237	-4.68017
P20929	-0.0202593	0.0422023	-0.0994733	0.921894	0.988343	-4.68019
O60237	-0.0165717	-0.149628	-0.0974854	0.923449	0.988994	-4.68022
O00629	0.0237714	0.0514844	0.0959115	0.924681	0.988994	-4.68024
Q15695	0.047872	-0.0985219	0.0954306	0.925057	0.988994	-4.68025
A6NDG6	-0.0170573	-0.0679029	-0.095107	0.925311	0.988994	-4.68026
P63241	0.0161471	0.0608265	0.0942251	0.926001	0.988994	-4.68027
P35568	0.023902	0.0253186	0.0895918	0.929629	0.989551	-4.68034
Q9UHQ9	-0.0220465	-0.0623707	-0.087524	0.931249	0.989551	-4.68037
Q96FZ7	-0.0170084	0.0975435	-0.0873073	0.931419	0.989551	-4.68037
Q13501	0.0161636	-0.154055	0.0872517	0.931462	0.989551	-4.68038
Q8NBN7	-0.0204089	-0.0315036	-0.0864493	0.932091	0.989551	-4.68039
P10109	0.0147891	-0.104427	0.0839917	0.934017	0.989551	-4.68042
P30040	-0.0162761	-0.0582336	-0.0838736	0.934109	0.989551	-4.68042
P46926	-0.0151517	-0.137265	-0.0838221	0.93415	0.989551	-4.68042
P15259	-0.0175252	-0.0476707	-0.0831865	0.934648	0.989551	-4.68043
Q9BTT0	0.0183748	-0.164858	0.0831578	0.93467	0.989551	-4.68043
O15371	-0.0173002	0.0456844	-0.0830925	0.934721	0.989551	-4.68043
Q86WC6	0.0184887	-0.344523	0.0828316	0.934926	0.989551	-4.68044
A8K5H9	0.0208021	-0.0819038	0.0815339	0.935943	0.989886	-4.68046
Q86VN1	0.0316775	0.0715433	0.0793563	0.93765	0.989907	-4.68049
Q96EL3	-0.0158995	0.101938	-0.0789246	0.937988	0.989907	-4.68049
P62851	0.0137305	-0.111544	0.0787092	0.938157	0.989907	-4.68049
Q9NSD9	-0.0166402	0.00984333	-0.0779342	0.938765	0.989907	-4.6805
P51553	0.0183798	0.0139796	0.0747995	0.941223	0.991447	-4.68054
C9JG97	-0.0167523	0.0230661	-0.0740977	0.941773	0.991447	-4.68055
Q16543	0.0139966	-0.0306352	0.0712272	0.944025	0.991447	-4.68059
P07451	0.0189343	0.0534619	0.0710895	0.944133	0.991447	-4.68059
Q96HE7	0.0166328	0.152966	0.0698799	0.945082	0.991447	-4.6806
Q7Z434	-0.0144697	-0.02514	-0.0695795	0.945318	0.991447	-4.68061
Q9Y371	0.0154664	0.0527663	0.0694452	0.945423	0.991447	-4.68061
O43772	0.0152256	-0.0309321	0.0680174	0.946543	0.991447	-4.68062
Q53H82	0.0130928	-0.125885	0.067846	0.946678	0.991447	-4.68063
Q3ZCW2	0.0186509	0.0195371	0.0671267	0.947242	0.991447	-4.68063
Q9UDY4	-0.0121237	0.0125532	-0.0650624	0.948862	0.992067	-4.68066
Q9HCC0	-0.0168984	-0.0816226	-0.0645819	0.949239	0.992067	-4.68066
Q14444	-0.014619	-0.191807	-0.0593454	0.95335	0.994346	-4.68072
P11532	-0.0100179	-0.0192307	-0.0588663	0.953726	0.994346	-4.68072
Q9NXA8	-0.0137733	-0.0423139	-0.0579962	0.954409	0.994346	-4.68073
Q9Y3D9	-0.0135739	-0.00180636	-0.057084	0.955125	0.994346	-4.68074
P01871	0.0162467	0.270357	0.0569092	0.955263	0.994346	-4.68074
Q15642	0.0101627	0.023652	0.0564258	0.955642	0.994346	-4.68074
Q5T440	-0.0127051	-0.076524	-0.0545144	0.957143	0.995175	-4.68076
Q9BYD6	-0.0115781	0.0902064	-0.0527209	0.958552	0.995276	-4.68078
P07357	-0.0181785	0.20265	-0.0513435	0.959634	0.995276	-4.68079
Q01469	-0.00993105	-0.172812	-0.0509796	0.959919	0.995276	-4.68079
Q9UQ13	-0.0126613	-0.0412354	-0.0508039	0.960057	0.995276	-4.6808
Q8TDC0	0.0116309	0.0308669	0.049216	0.961305	0.995838	-4.68081
P51970	0.0104723	-0.180478	0.047175	0.962908	0.996769	-4.68082
Q92538	0.0107427	0.0788106	0.0452843	0.964394	0.996794	-4.68084
O94760	0.00907067	-0.0482262	0.0449395	0.964665	0.996794	-4.68084
P02533	-0.0319167	0.505658	-0.0444506	0.965049	0.996794	-4.68085
P02452	0.0150122	0.354998	0.0392641	0.969124	0.998467	-4.68088
P62280	-0.00826509	0.0459696	-0.0379484	0.970159	0.998467	-4.68089
Q9NWB6	-0.00781753	-0.0389454	-0.0378818	0.970211	0.998467	-4.68089
P43686	0.00881733	0.105441	0.0376625	0.970383	0.998467	-4.68089
P13535	0.0272843	0.327769	0.0367871	0.971071	0.998467	-4.6809
P25787	-0.00627282	-0.150052	-0.0320105	0.974826	0.998467	-4.68092
A0A4W9A917	-0.00971271	0.343345	-0.0319585	0.974867	0.998467	-4.68093
Q8N0U4	0.00612887	0.0207718	0.030885	0.975711	0.998467	-4.68093
Q99471	0.0053795	-0.0285518	0.0301237	0.976309	0.998467	-4.68093
P62244	-0.00531623	-0.00715969	-0.027915	0.978046	0.998467	-4.68095
Q9H0V9	-0.00657991	0.0550821	-0.0275646	0.978321	0.998467	-4.68095
P61925	0.00595466	-0.0186826	0.0273358	0.978501	0.998467	-4.68095
Q99447	-0.00684921	-0.103184	-0.0272512	0.978568	0.998467	-4.68095
P63146	-0.00746125	-0.338146	-0.0271188	0.978672	0.998467	-4.68095
Q8TAT6	0.00615133	0.105009	0.0251235	0.980241	0.998467	-4.68096
O75396	-0.00440207	0.0768812	-0.0233398	0.981643	0.998467	-4.68097
Q04760	0.00463757	0.0429714	0.0224003	0.982382	0.998467	-4.68097
O43776	0.00469126	0.115488	0.0223068	0.982456	0.998467	-4.68097
Q9H0N5	0.00459535	-0.143889	0.0214368	0.98314	0.998467	-4.68097
Q96HN2	0.00400342	-0.117203	0.0206531	0.983756	0.998467	-4.68097
Q8WXH0	0.00416205	0.00541334	0.0202722	0.984056	0.998467	-4.68098
Q9H477	0.0041003	-0.0602133	0.0173749	0.986334	0.998467	-4.68099
P49721	-0.00334197	-0.217556	-0.0169983	0.98663	0.998467	-4.68099
Q01432	-0.00389412	-0.0552716	-0.0168347	0.986759	0.998467	-4.68099
Q9H3K6	0.00285959	-0.108198	0.0156789	0.987668	0.998467	-4.68099
Q13155	0.00262397	0.0494862	0.0130561	0.989731	0.998467	-4.681
O14828	0.00288554	0.217065	0.013047	0.989738	0.998467	-4.681
O43896	0.00233926	0.0423309	0.0103646	0.991848	0.998467	-4.681
Q13442	0.00222414	-0.0876879	0.00964241	0.992416	0.998467	-4.681
Q9UNE7	0.0014888	-0.00904763	0.0089466	0.992963	0.998467	-4.681
P53602	0.00219869	0.0446335	0.0082861	0.993482	0.998467	-4.681
P63220	0.00202354	-0.225937	0.00828549	0.993483	0.998467	-4.681
Q13045	0.00170174	0.0153309	0.00812028	0.993613	0.998467	-4.681
P78383	-0.0017523	-0.0367141	-0.00717677	0.994355	0.998467	-4.68101
O14732	0.00136373	0.002914	0.00690489	0.994569	0.998467	-4.68101
Q8N112	-0.0015546	-0.02656	-0.00568213	0.995531	0.998467	-4.68101
Q8IUZ5	-0.00130829	-0.0575585	-0.00513104	0.995964	0.998467	-4.68101
Q96MG2	0.000808806	-0.0489197	0.00421494	0.996685	0.998467	-4.68101
P07942	-0.000887834	0.0191301	-0.00393643	0.996904	0.998467	-4.68101
Q9Y2S7	-0.00092384	0.0365251	-0.00338643	0.997336	0.998467	-4.68101
P48047	0.000872564	-0.0538555	0.00319694	0.997485	0.998467	-4.68101
Q9H0B6	-0.00072771	0.073852	-0.00299798	0.997642	0.998467	-4.68101
P82675	-0.000666484	0.00912561	-0.00283517	0.99777	0.998467	-4.68101
P54725	-0.000383574	-0.113522	-0.00212475	0.998329	0.998467	-4.68101
Q8N4T8	0.000459419	0.0394141	0.00194878	0.998467	0.998467	-4.68101
